# Supplementary material for: Food fraud and the perceived integrity of European food imports into China
Source: PLoS One. 2018 May 23;13(5):e0195817. doi: 10.1371/journal.pone.0195817 (PMC5965827; doi:10.1371/journal.pone.0195817)
Supplement: S1 Dataset — (XLSX) [file pone.0195817.s003.xlsx]

## Sheet: Data View
QrNo1	S1	S4	AGE	S5	S6	S7_1_1	S7_1_2	S7_1_3	S7_1_4	S7_1_5	S7_1_6	S7_1_7	S7_1_9	S7_2_1	S7_2_2	S7_2_3	S7_2_4	S7_2_5	S7_2_6	S7_2_7	S7_2_9	S8_1	S8_2	S8_3	S8_4	S8_5	S8_6	S8_7	S8_8	Q1_1_T1	Q1_1_T2	Q1_1_T3	Q1_1_T4	Q1_1_T5	Q1_1_T6	Q1_1_T7	Q1_1_T8	Q1_1_T9	Q3_3_T1	Q3_3_T2	Q3_3_T3	Q3_3_T4	Q3_3_T5	Q3_3_T6	Q3_3_T7	Q3_3_T8	Q3_4_T1	Q3_4_T2	Q3_4_T3
12001	1	2	33	1	6	1	0	0	0	1	1	0	0	1	0	0	0	1	1	0	0	0	0	0	0	1	1	1	1	4	4	5	5	5	5	5	5	3	2	3	3	5	4	5	2	4	2	4	4
12002	1	1	26	1	5	0	0	0	1	0	0	1	0	1	0	0	1	0	0	0	0	0	0	1	1	0	0	0	0	5	5	5	5	5	5	5	5	5	4	5	5	5	5	4	4	5	5	5	5
12003	1	2	30	1	6	0	0	1	1	0	1	0	0	1	0	1	1	0	1	0	0	1	1	1	1	0	0	1	1	5	5	5	5	5	5	5	5	5	4	5	4	5	4	5	4	4	2	3	3
12004	1	2	32	1	5	1	1	1	0	0	1	1	0	1	1	1	0	0	1	1	0	1	1	0	0	0	0	1	1	5	5	5	5	5	4	5	4	5	4	4	4	4	4	4	4	4	4	4	4
12005	1	1	25	1	5	1	1	0	1	0	1	0	0	1	0	0	1	0	1	0	0	0	0	1	1	0	0	1	1	5	5	5	5	5	5	5	5	5	4	5	4	4	5	5	4	4	4	4	4
12006	1	2	39	2	5	1	0	1	0	1	0	1	0	1	0	1	0	1	0	1	0	1	1	0	0	1	1	0	0	5	5	5	5	5	5	5	5	5	4	2	4	3	4	4	4	3	4	4	5
12007	1	1	37	2	5	1	1	1	1	1	0	1	0	1	1	1	1	1	0	1	0	1	1	1	1	1	1	0	0	5	5	5	5	5	5	5	5	5	3	2	3	4	3	4	3	3	2	3	3
12008	1	2	42	2	5	1	0	0	0	1	0	0	0	1	0	1	0	1	0	0	0	0	1	0	0	1	1	0	0	5	5	5	5	5	5	5	4	5	5	4	5	5	5	5	5	5	3	5	4
12009	1	1	42	2	5	1	0	0	0	1	0	1	0	1	0	0	1	1	0	1	0	0	0	0	1	1	1	0	0	5	5	5	5	5	5	5	5	5	4	4	4	4	5	4	4	4	4	4	4
12010	1	1	38	2	6	1	1	0	1	1	0	0	0	1	1	0	1	1	0	0	0	0	0	1	1	1	1	0	0	5	5	5	5	5	5	5	5	5	4	4	4	4	4	5	4	4	4	4	4
12011	1	1	42	2	5	0	1	1	1	0	0	0	0	0	0	0	1	1	1	0	0	1	0	1	1	0	1	0	1	1	1	1	1	4	1	2	4	1	2	3	4	3	3	4	2	4	4	4	3
12012	1	2	45	2	6	1	0	0	0	1	1	1	0	1	1	0	0	1	1	1	0	0	0	0	0	1	1	1	1	5	4	5	5	4	5	5	3	5	5	4	4	4	4	4	5	5	3	4	3
12013	1	2	27	1	5	0	0	1	0	1	0	0	0	0	0	1	0	1	0	1	0	1	1	0	0	1	1	0	0	5	5	5	5	4	4	3	4	5	2	1	4	4	3	4	2	3	3	4	4
12014	1	1	24	1	5	0	1	0	1	0	0	1	0	1	1	0	0	1	0	0	0	0	0	1	0	0	1	0	0	5	5	5	5	4	5	5	4	4	4	5	4	4	5	5	4	5	5	4	4
12015	1	1	32	1	5	1	0	0	1	0	0	1	0	0	0	0	1	1	0	1	0	0	0	1	1	0	1	0	0	4	4	4	4	4	4	4	4	4	4	4	3	4	4	4	3	4	5	4	4
12016	1	1	23	1	7	0	0	0	0	1	1	0	0	0	0	0	0	1	1	0	0	0	0	0	0	1	1	1	1	5	5	5	5	2	2	5	4	5	3	4	4	3	4	3	3	4	2	4	3
12017	1	1	49	2	5	1	0	1	0	0	0	0	0	1	0	1	0	0	0	0	0	1	1	0	0	0	0	0	0	5	5	5	5	2	4	4	5	3	3	3	5	3	5	3	3	5	3	5	5
12018	1	2	28	1	5	1	0	1	0	1	1	0	0	1	0	1	0	1	0	0	0	1	1	0	0	1	1	1	0	5	4	5	5	5	5	4	5	5	4	4	4	4	4	5	3	5	4	4	4
12019	1	2	27	1	6	1	1	1	0	1	1	1	0	1	1	1	0	1	1	1	0	1	1	0	0	1	1	1	1	5	5	5	5	5	5	5	5	5	5	5	5	5	5	5	5	5	2	5	2
12020	1	2	50	2	6	1	0	0	0	1	0	1	0	1	0	0	1	1	1	0	0	0	0	0	1	1	1	0	1	5	5	5	5	4	4	4	4	5	4	5	5	4	4	3	4	5	3	4	4
12022	1	2	44	2	6	1	0	0	0	1	0	0	0	1	0	0	0	1	0	0	0	0	0	0	0	1	1	0	0	4	3	5	5	4	5	4	4	4	5	4	4	3	4	4	4	5	5	4	3
12024	1	2	34	1	5	1	0	0	0	1	0	1	0	1	0	0	0	1	0	1	0	0	0	0	0	1	1	0	0	5	5	5	5	4	4	5	4	5	4	5	4	4	4	4	4	5	5	5	4
12025	1	2	35	1	6	1	0	1	0	1	0	0	0	1	0	1	0	1	0	0	0	1	1	0	0	1	1	0	0	5	5	5	5	4	4	4	4	5	4	5	4	4	4	4	4	5	4	4	4
12026	1	1	50	2	5	1	0	0	1	1	0	0	0	1	0	0	1	1	0	0	0	0	0	1	1	1	1	0	0	5	4	5	4	4	4	3	4	4	3	4	4	4	4	4	4	4	3	4	5
12027	1	1	37	2	5	0	1	1	0	1	1	1	0	1	1	1	0	1	1	1	0	1	1	0	0	1	1	1	1	5	5	5	5	4	5	5	5	5	5	5	5	5	4	4	5	5	5	5	4
12030	1	1	28	1	6	1	0	1	1	1	0	1	0	1	0	1	1	1	0	1	0	1	1	1	1	1	1	0	0	5	5	4	4	4	5	4	4	4	5	4	4	4	4	5	5	4	5	5	4
12031	1	2	24	1	6	1	0	0	0	1	0	1	0	1	0	0	0	1	0	1	0	0	0	0	0	1	1	0	0	5	5	5	5	4	5	5	5	5	4	5	5	5	5	5	4	4	4	4	5
12032	1	2	42	2	5	1	1	0	1	1	0	1	0	1	1	0	1	1	0	1	0	0	0	1	1	1	1	0	0	5	5	5	5	4	5	5	5	5	4	4	5	3	3	3	2	2	3	4	2
12033	1	2	28	1	5	1	0	1	1	1	0	1	0	1	0	1	1	1	0	1	0	1	1	1	1	1	1	0	0	4	4	4	5	4	5	5	4	4	4	5	5	4	4	5	4	4	4	4	5
12034	1	2	45	2	5	1	0	0	0	1	0	0	0	1	0	0	1	1	0	0	0	0	0	0	1	1	1	0	0	5	5	5	5	4	5	5	4	5	3	2	2	3	4	4	3	2	2	4	4
12035	1	2	35	1	5	1	0	1	0	1	0	0	0	1	0	1	0	1	0	0	0	1	1	0	0	1	1	0	0	5	5	4	5	4	4	5	4	5	4	2	4	4	4	4	4	4	2	4	4
12036	1	1	50	2	7	1	0	0	0	1	0	0	0	1	0	0	1	1	0	0	0	0	0	0	1	1	1	0	0	5	5	5	5	5	5	5	5	5	4	3	4	4	4	5	4	4	2	4	4
12037	1	1	53	2	7	1	1	0	0	1	0	0	0	1	1	0	0	1	0	0	0	0	0	0	0	1	1	0	0	5	5	5	5	5	5	5	5	5	4	4	4	5	4	5	5	4	4	5	5
12038	1	1	43	2	5	1	0	1	0	1	0	1	0	1	0	1	0	1	0	0	0	1	1	0	0	1	1	0	0	5	5	5	5	4	5	5	4	5	2	2	2	2	2	4	2	2	3	4	4
12039	1	1	25	1	5	0	1	0	1	0	1	1	0	0	1	0	1	1	1	0	0	0	0	1	1	0	1	1	1	5	5	5	5	4	5	5	5	4	4	3	4	3	3	4	2	5	2	3	3
12040	1	1	35	1	5	1	0	0	0	1	0	0	0	1	0	0	0	1	0	0	0	0	0	0	0	1	1	0	0	4	5	5	5	4	5	5	5	5	2	2	4	3	4	4	2	3	2	4	4
12041	1	2	54	2	6	1	0	0	0	1	1	1	0	0	0	0	0	1	1	0	0	0	0	0	0	1	1	1	1	5	5	5	5	4	5	5	4	5	5	5	5	5	5	5	5	5	5	4	4
12042	1	2	34	1	5	1	0	1	0	1	0	0	0	1	0	1	0	1	0	0	0	1	1	0	0	1	1	0	0	4	4	4	4	4	4	3	3	4	4	4	5	4	4	4	4	4	5	5	4
12043	1	2	47	2	7	1	1	0	0	1	1	1	0	1	0	0	0	1	1	1	0	0	0	0	0	1	1	1	1	5	5	5	5	4	4	4	5	5	5	5	5	4	4	4	4	5	5	4	3
12045	1	1	28	1	6	1	1	0	1	0	1	0	0	0	1	0	1	1	1	1	0	0	0	1	1	0	1	1	1	5	5	5	4	4	5	5	5	5	4	2	3	2	2	4	2	5	4	5	2
12046	1	1	18	1	5	0	0	0	1	0	0	1	0	0	0	0	1	0	0	1	0	0	0	1	1	0	0	0	0	5	4	5	5	4	5	4	4	5	5	5	4	5	5	5	5	5	5	5	5
12048	1	2	25	1	5	1	0	1	0	1	0	0	0	1	0	1	0	1	0	0	0	1	1	0	0	1	1	0	0	4	5	4	5	5	5	5	4	4	5	5	4	4	5	5	5	4	4	5	4
12050	1	2	23	1	5	1	0	0	1	1	0	1	0	1	0	0	1	1	0	1	0	0	0	1	1	1	1	0	0	4	4	5	5	4	4	4	4	5	5	5	5	5	5	5	5	5	5	5	5
12051	1	2	48	2	5	1	1	0	0	1	1	1	0	1	1	0	0	1	1	1	0	0	0	0	0	1	1	1	1	5	5	5	5	4	4	4	4	5	5	5	5	2	3	3	4	5	4	3	2
12052	1	2	50	2	5	1	1	0	1	0	0	0	0	1	0	0	1	0	0	0	0	0	0	1	1	0	0	0	0	5	5	5	5	4	5	5	5	5	4	3	4	4	4	4	4	4	2	4	4
12053	1	1	38	2	5	1	1	1	0	1	0	0	0	1	1	1	0	1	0	0	0	1	1	0	0	1	1	0	0	4	5	5	5	5	5	5	4	5	3	2	3	3	4	4	3	2	1	3	4
12054	1	2	30	1	5	1	0	1	0	1	0	1	0	1	0	1	0	1	0	0	0	1	1	0	0	1	1	0	0	5	5	5	5	5	5	5	5	5	3	1	3	4	4	4	3	3	3	4	4
12055	1	1	43	2	5	1	0	0	0	1	0	0	0	1	0	1	0	1	0	0	0	0	1	0	0	1	1	0	0	4	5	5	4	5	5	5	4	5	4	2	4	4	4	5	4	4	2	2	4
12056	1	2	26	1	5	1	0	0	0	1	1	1	0	1	0	0	1	1	0	1	0	0	0	0	1	1	1	1	0	5	5	5	4	4	5	5	5	5	1	1	4	4	4	4	4	3	1	4	5
12057	1	1	35	1	5	1	1	1	1	1	1	1	0	1	1	1	1	1	1	1	0	1	1	1	1	1	1	1	1	5	5	5	5	5	5	5	5	5	3	3	5	5	5	5	4	5	3	5	5
12059	1	1	26	1	5	1	0	0	0	1	0	1	0	1	0	0	1	0	0	1	0	0	0	0	1	1	0	0	0	4	4	4	4	5	4	5	4	4	5	4	5	4	5	4	5	4	4	4	4
12060	1	1	20	1	5	0	0	0	0	1	0	1	0	0	0	0	0	1	0	1	0	0	0	0	0	1	1	0	0	4	4	4	4	3	5	3	3	4	3	4	4	4	5	4	2	5	3	4	5
12061	1	1	41	2	6	1	0	0	0	1	1	1	0	1	1	0	0	1	1	1	0	0	0	0	0	1	1	1	1	5	5	5	5	5	5	5	5	5	3	3	3	3	3	5	3	1	3	3	3
12201	1	2	31	1	6	1	1	1	0	1	0	0	0	1	1	1	0	1	0	0	0	1	1	0	0	1	1	0	0	5	5	5	5	5	5	5	2	5	3	1	5	1	3	5	4	3	4	5	4
12203	1	2	23	1	6	1	1	0	0	1	0	1	0	1	1	0	1	1	0	1	0	0	0	0	1	1	1	0	0	5	5	5	5	3	5	4	3	5	3	4	4	4	4	4	2	3	3	4	4
12204	1	2	35	1	6	0	1	0	0	1	0	0	0	0	0	0	0	1	0	0	0	0	0	0	0	1	1	0	0	4	4	4	4	3	4	4	4	4	3	4	4	3	4	4	4	4	4	4	4
12205	1	1	24	1	6	1	0	0	0	1	0	0	0	1	0	0	1	1	0	0	0	0	0	0	1	1	1	0	0	5	5	3	5	1	1	1	3	5	5	5	5	2	2	2	3	5	2	5	5
12206	1	2	50	2	5	1	1	0	0	1	0	1	0	1	1	0	0	1	0	1	0	0	0	0	0	1	1	0	0	5	5	5	5	4	4	5	5	5	5	5	4	4	4	4	4	5	5	5	4
12207	1	1	39	2	5	1	0	0	1	1	0	0	0	1	0	0	1	1	0	0	0	0	0	1	1	1	1	0	0	5	5	4	5	5	4	4	4	5	4	4	4	5	4	5	4	5	4	4	4
12208	1	1	40	2	5	1	0	0	1	1	0	0	0	1	0	0	1	1	0	0	0	0	0	1	1	1	1	0	0	5	5	5	5	5	4	4	4	4	4	4	5	4	5	5	4	5	5	5	4
12209	1	2	38	2	5	1	0	0	0	0	1	0	0	1	0	1	0	1	0	0	0	0	1	0	0	0	1	1	0	4	4	4	4	4	4	4	4	4	4	4	4	4	5	4	5	5	4	5	5
12210	1	2	50	2	7	1	0	0	0	1	0	0	0	1	0	0	1	1	0	0	0	0	0	0	1	1	1	0	0	5	4	5	5	4	4	4	4	5	4	4	4	4	4	4	4	5	4	5	4
12211	1	1	26	1	6	1	1	1	0	1	0	1	0	1	0	1	0	1	0	0	0	1	1	0	0	1	1	0	0	5	5	5	5	5	5	5	5	5	1	1	1	1	1	5	3	2	1	1	3
12212	1	1	27	1	5	0	0	0	1	0	1	0	0	0	0	0	1	0	1	0	0	0	0	1	1	0	0	1	1	5	5	3	4	3	2	5	5	5	3	5	1	5	3	5	1	1	5	4	5
12213	1	1	31	1	5	1	0	0	0	0	0	1	0	1	1	0	0	1	0	0	0	0	0	0	0	0	1	0	0	5	4	5	5	4	3	4	4	5	3	3	4	4	3	5	3	4	3	3	3
12214	1	2	23	1	5	1	0	0	1	1	0	1	0	1	0	0	1	1	0	1	0	0	0	1	1	1	1	0	0	5	5	5	5	5	5	5	5	5	4	4	4	4	4	5	4	4	4	4	4
12215	1	2	21	1	5	1	1	0	0	0	0	1	0	1	1	1	0	0	0	1	0	0	1	0	0	0	0	0	0	5	5	5	5	5	5	5	5	5	3	3	4	4	4	5	3	3	2	3	4
12216	1	1	36	2	5	1	1	0	0	1	1	1	0	1	1	0	1	1	0	1	0	0	0	0	1	1	1	1	0	5	5	5	5	5	5	5	5	5	3	3	3	3	3	3	3	3	4	4	4
12218	1	1	54	2	5	1	0	1	0	1	0	0	0	1	0	1	0	1	0	0	0	1	1	0	0	1	1	0	0	5	5	5	5	5	5	5	5	5	4	4	4	3	5	5	4	4	2	2	4
12219	1	2	36	2	5	1	0	0	0	1	0	0	0	1	0	1	0	1	0	0	0	0	1	0	0	1	1	0	0	5	5	5	5	5	5	5	5	5	4	2	3	4	4	5	3	4	3	4	4
12220	1	2	44	2	5	1	0	0	0	1	0	0	0	1	0	0	0	1	0	0	0	0	0	0	0	1	1	0	0	5	5	4	5	5	4	5	4	5	5	5	4	3	3	3	4	5	2	4	4
12221	1	2	30	1	5	1	1	0	0	1	0	1	0	0	1	1	0	1	0	0	0	0	1	0	0	1	1	0	0	5	5	1	5	2	1	5	5	5	3	5	5	3	3	4	4	3	5	4	3
12222	1	1	42	2	5	0	0	1	0	1	0	0	0	0	0	1	0	1	0	0	0	1	1	0	0	1	1	0	0	4	5	5	5	5	4	4	5	4	4	4	5	5	5	5	4	4	5	5	5
12223	1	1	25	1	6	1	1	0	0	1	0	0	0	1	1	0	0	1	0	1	0	0	0	0	0	1	1	0	0	1	1	1	1	2	1	1	2	1	3	3	3	3	3	4	3	2	3	3	3
12224	1	2	40	2	5	0	1	0	1	0	0	0	0	0	0	0	1	1	1	0	0	0	0	1	1	0	1	0	1	5	5	5	5	5	5	4	5	5	5	5	4	5	5	5	5	4	5	4	5
12225	1	2	48	2	5	1	0	1	1	0	0	0	0	1	0	1	0	0	0	0	0	1	1	1	0	0	0	0	0	3	3	3	2	3	3	3	3	3	2	4	3	1	2	3	4	3	4	4	1
12226	1	2	47	2	5	1	0	0	0	1	0	1	0	0	0	0	1	0	1	0	0	0	0	0	1	1	0	0	1	3	1	3	5	5	1	3	4	1	5	5	5	4	5	5	5	5	5	5	5
12227	1	2	25	1	7	1	1	0	0	1	0	1	0	1	1	0	0	1	0	1	0	0	0	0	0	1	1	0	0	5	5	5	5	5	5	2	5	5	3	3	4	4	4	5	3	3	3	3	4
12228	1	1	43	2	5	1	0	0	1	1	0	1	0	1	0	0	1	0	0	1	0	0	0	1	1	1	0	0	0	5	5	4	5	4	5	4	5	5	4	3	4	4	3	5	4	4	3	5	4
12229	1	2	24	1	6	1	0	1	0	0	0	1	0	1	0	1	0	0	0	1	0	1	1	0	0	0	0	0	0	4	5	5	5	4	5	5	5	5	1	1	3	2	2	4	2	2	1	3	2
12230	1	1	36	2	5	0	0	0	0	1	1	0	0	0	0	0	0	1	0	0	0	0	0	0	0	1	1	1	0	5	5	5	5	5	2	5	5	5	5	5	5	4	4	4	5	5	2	4	4
12231	1	2	39	2	5	1	0	0	0	1	0	1	0	1	1	0	0	1	1	1	0	0	0	0	0	1	1	0	1	1	1	1	1	2	3	1	1	1	4	4	4	5	4	5	4	4	4	3	5
12232	1	2	38	2	5	1	0	0	0	1	1	1	0	1	0	0	0	1	0	0	0	0	0	0	0	1	1	1	0	1	1	1	1	1	1	1	1	1	1	1	5	2	4	4	5	5	1	3	1
12233	1	2	46	2	5	0	1	0	0	1	0	0	0	0	1	0	1	1	0	0	0	0	0	0	1	1	1	0	0	2	2	2	2	3	3	2	2	2	3	3	3	3	3	3	3	3	3	3	4
12234	1	1	25	1	6	1	1	0	1	1	0	1	0	1	1	0	1	1	0	1	0	0	0	1	1	1	1	0	0	1	1	1	2	2	1	2	2	1	3	4	5	4	4	3	3	4	4	5	4
12235	1	1	23	1	5	0	0	0	1	0	0	1	0	0	0	0	1	0	0	1	0	0	0	1	1	0	0	0	0	2	1	1	1	2	1	2	2	1	4	5	4	4	4	3	4	5	3	4	4
12236	1	1	30	1	5	0	1	0	0	1	0	1	0	1	1	0	0	1	0	0	0	0	0	0	0	1	1	0	0	1	1	1	1	1	1	1	1	1	1	4	1	4	1	4	4	1	4	1	4
12237	1	2	23	1	7	1	0	0	0	1	0	1	0	1	0	1	0	0	0	1	0	0	1	0	0	1	0	0	0	2	1	2	2	3	3	2	1	2	3	4	4	4	5	4	4	5	4	4	4
12238	1	1	40	2	5	0	0	1	0	0	0	0	0	1	0	1	0	0	1	0	0	1	1	0	0	0	0	0	1	1	1	1	1	2	1	3	1	1	4	5	4	5	5	5	4	5	4	5	5
12239	1	1	30	1	5	1	0	1	1	1	0	1	0	1	1	0	1	1	1	1	0	1	0	1	1	1	1	0	1	1	1	1	1	4	1	1	1	1	4	4	4	4	4	4	4	4	4	4	4
12240	1	1	36	2	5	1	0	0	1	0	1	1	0	0	0	0	1	0	1	1	0	0	0	1	1	0	0	1	1	1	1	1	2	3	1	1	1	1	5	5	4	4	4	4	4	5	4	4	5
12241	1	1	35	1	5	1	0	1	0	0	0	0	0	0	0	1	0	1	0	1	0	1	1	0	0	0	1	0	0	5	2	3	5	5	2	3	4	4	3	4	4	3	4	2	4	5	3	5	3
12242	1	1	21	1	5	0	0	0	1	0	0	0	0	0	0	0	1	0	0	0	0	0	0	1	1	0	0	0	0	2	4	1	1	2	1	2	1	1	4	2	2	4	4	5	2	2	2	2	4
12243	1	1	40	2	6	1	1	1	0	1	0	0	0	1	0	1	0	0	0	0	0	1	1	0	0	1	0	0	0	5	5	4	3	3	3	4	4	4	3	5	4	4	4	4	5	4	5	4	4
12244	1	2	23	1	6	0	1	0	0	1	0	1	0	1	1	0	0	1	0	1	0	0	0	0	0	1	1	0	0	5	5	5	5	5	5	3	5	5	3	3	3	4	3	5	3	4	3	4	4
12245	1	2	36	2	6	1	1	0	1	1	0	0	0	1	0	0	1	1	0	0	0	0	0	1	1	1	1	0	0	5	5	5	5	5	5	5	5	5	5	5	5	5	4	5	5	5	5	4	5
12246	1	1	22	1	6	1	0	0	0	1	1	1	0	1	1	0	0	0	0	0	0	0	0	0	0	1	0	1	0	5	5	1	5	1	5	1	5	5	5	5	5	5	5	5	5	5	5	4	4
12248	1	2	26	1	6	0	1	1	0	0	0	0	0	1	0	1	0	0	0	0	0	1	1	0	0	0	0	0	0	3	5	4	4	3	5	5	5	5	1	1	1	1	1	4	1	1	1	1	1
12249	1	1	52	2	6	1	0	1	1	0	1	1	0	1	0	0	1	1	0	1	0	1	0	1	1	0	1	1	0	4	3	2	5	1	4	1	4	1	5	4	5	1	4	4	3	4	4	4	4
12250	1	1	40	2	6	0	0	1	0	1	0	0	0	1	0	0	0	1	0	0	0	1	0	0	0	1	1	0	0	5	5	5	5	5	4	4	5	5	5	5	5	5	5	5	5	5	4	5	4
12251	1	1	37	2	5	1	1	1	0	0	0	0	0	1	0	0	0	1	1	0	0	1	0	0	0	0	1	0	1	1	1	1	1	3	2	1	1	1	1	5	4	3	1	5	4	4	5	5	3
12252	1	1	45	2	5	0	0	0	0	1	0	0	0	0	0	0	0	1	0	0	0	0	0	0	0	1	1	0	0	1	1	1	1	2	2	3	1	1	3	4	5	4	4	5	3	5	4	5	3
12253	1	2	22	1	6	0	0	0	1	1	0	0	0	0	0	1	0	0	0	1	0	0	1	1	0	1	0	0	0	1	1	3	1	3	1	3	4	1	4	4	5	3	3	4	5	2	4	5	3
12254	1	2	24	1	6	1	1	0	0	1	0	1	0	1	1	0	0	1	0	0	0	0	0	0	0	1	1	0	0	5	5	5	5	5	5	5	5	5	5	5	5	5	5	5	5	5	5	5	5
12255	1	1	22	1	6	0	0	0	0	1	0	1	0	1	1	0	0	1	0	0	0	0	0	0	0	1	1	0	0	5	4	5	4	3	4	3	5	5	3	3	4	3	3	4	4	5	4	4	3
12256	1	1	24	1	6	1	1	0	1	1	0	0	0	1	1	0	1	0	0	0	0	0	0	1	1	1	0	0	0	1	1	1	1	2	1	1	1	3	5	4	5	5	5	5	4	5	3	4	4
12257	1	2	21	1	6	1	1	0	0	0	0	1	0	1	1	1	0	0	0	1	0	0	1	0	0	0	0	0	0	1	1	1	1	2	2	3	2	1	3	3	4	5	5	4	3	5	3	3	5
12258	1	2	29	1	5	1	1	1	0	1	1	1	0	1	1	1	0	1	1	1	0	1	1	0	0	1	1	1	1	5	5	5	5	5	5	5	5	5	2	2	2	4	4	5	2	2	2	3	4
12259	1	2	45	2	6	0	0	0	0	1	1	1	0	1	0	0	1	0	1	1	0	0	0	0	1	1	0	1	1	1	4	1	2	5	4	3	3	2	2	4	5	4	5	5	5	5	5	4	5
12260	1	2	46	2	5	1	1	0	1	0	0	0	0	1	0	0	1	1	0	0	0	0	0	1	1	0	1	0	0	5	5	5	5	4	5	5	5	5	2	2	2	3	3	3	2	5	2	2	3
12261	1	1	39	2	5	0	0	0	1	0	0	0	0	1	0	0	1	0	0	0	0	0	0	1	1	0	0	0	0	1	1	1	1	3	2	3	1	1	2	2	4	5	4	3	2	5	2	5	5
12262	1	2	40	2	6	0	0	1	0	1	1	0	0	1	0	1	0	0	0	1	0	1	1	0	0	1	0	1	0	5	5	5	5	5	5	3	4	5	4	4	5	4	4	3	3	5	4	4	4
12263	1	1	38	2	7	1	0	1	0	0	1	1	0	1	1	0	0	1	1	1	0	1	0	0	0	0	1	1	1	5	5	5	5	5	3	5	5	5	3	4	4	3	3	5	4	4	4	4	4
12264	1	1	40	2	5	0	0	0	0	1	0	0	0	1	0	0	0	1	0	0	0	0	0	0	0	1	1	0	0	5	4	3	3	4	4	4	3	4	5	5	5	2	2	2	5	4	1	3	4
12265	1	1	25	1	6	0	1	0	1	0	0	1	0	1	1	0	1	0	0	1	0	0	0	1	1	0	0	0	0	5	5	5	5	5	4	3	5	5	3	3	3	3	3	3	4	3	3	3	3
12266	1	2	21	1	6	0	1	0	0	1	0	0	0	1	0	0	0	0	0	1	0	0	0	0	0	1	0	0	0	4	4	3	5	5	5	5	5	5	5	4	5	5	5	5	5	5	1	1	2
12267	1	2	48	2	5	0	0	1	0	1	0	0	0	0	0	1	0	0	0	0	0	1	1	0	0	1	0	0	0	5	5	4	5	4	4	5	5	4	5	5	4	5	5	5	5	4	5	5	5
12268	1	1	18	1	6	1	0	0	1	0	0	0	0	0	0	0	1	0	0	1	0	0	0	1	1	0	0	0	0	5	5	5	5	5	5	5	5	5	1	4	5	5	3	4	4	5	5	5	4
12269	1	2	38	2	6	1	0	1	0	0	1	0	0	1	0	1	0	0	1	0	0	1	1	0	0	0	0	1	1	4	5	5	5	5	5	2	5	5	5	5	2	5	5	2	5	5	4	5	5
12270	1	1	26	1	7	0	0	0	1	1	0	1	0	0	0	0	1	1	0	0	0	0	0	1	1	1	1	0	0	5	4	4	3	4	5	4	3	5	5	4	3	3	5	5	5	4	3	3	3
12271	1	1	44	2	6	0	0	1	1	1	0	0	0	1	0	0	1	1	0	0	0	1	0	1	1	1	1	0	0	5	5	5	5	5	5	5	5	5	4	2	5	2	5	4	5	4	4	5	4
12272	1	2	48	2	6	1	1	1	1	1	1	1	0	1	1	0	0	1	1	1	0	1	0	1	0	1	1	1	1	5	5	5	5	5	5	5	5	5	2	3	4	2	2	4	2	3	3	5	4
12273	1	1	30	1	6	1	0	1	0	1	0	0	0	0	0	1	0	0	0	1	0	1	1	0	0	1	0	0	0	4	4	4	4	4	4	4	4	4	4	4	4	4	4	4	4	4	4	4	4
12275	1	2	45	2	5	1	0	0	0	1	0	0	0	0	0	0	0	1	0	0	0	0	0	0	0	1	1	0	0	5	5	5	5	5	5	5	5	5	5	4	5	5	5	5	5	5	4	5	5
12276	1	2	33	1	6	0	0	1	0	1	0	1	0	0	0	1	0	1	0	0	0	1	1	0	0	1	1	0	0	5	5	4	4	5	5	4	5	4	4	3	2	2	3	3	4	4	4	3	2
12277	1	2	31	1	5	0	1	1	0	0	0	0	0	0	0	1	0	0	1	0	0	1	1	0	0	0	0	0	1	5	5	4	4	5	5	5	5	5	3	3	4	3	3	3	3	3	3	3	3
12278	1	1	19	1	5	1	1	0	0	1	1	1	0	1	1	0	1	1	1	1	0	0	0	0	1	1	1	1	1	5	4	4	5	3	4	3	5	4	5	5	5	5	5	5	5	5	5	5	5
12280	1	2	36	2	5	0	0	1	0	0	0	0	0	0	0	1	0	0	0	0	0	1	1	0	0	0	0	0	0	5	5	5	5	5	5	5	5	5	4	4	4	4	4	5	4	4	4	5	5
12281	1	2	37	2	5	1	1	1	1	1	1	1	0	1	1	1	1	1	1	1	0	1	1	1	1	1	1	1	1	5	5	5	5	5	5	5	5	5	5	5	5	5	5	5	5	5	5	5	5
12282	1	1	23	1	6	0	0	0	1	1	0	0	0	0	0	0	1	1	0	0	0	0	0	1	1	1	1	0	0	5	5	5	5	4	4	5	4	4	5	4	4	4	4	4	4	4	4	4	3
12283	1	1	53	2	6	1	0	0	0	1	1	0	0	1	0	0	0	1	1	0	0	0	0	0	0	1	1	1	1	4	4	4	5	4	4	5	5	5	5	5	5	4	5	5	5	5	5	3	4
12284	1	1	36	2	5	1	1	1	0	1	1	1	0	1	1	1	0	1	1	1	0	1	1	0	0	1	1	1	1	5	5	4	4	4	4	4	5	4	5	5	5	4	5	5	5	5	5	5	5
12285	1	1	50	2	6	1	0	0	0	1	1	0	0	1	0	0	0	1	1	0	0	0	0	0	0	1	1	1	1	3	3	3	4	3	3	3	3	3	3	3	3	3	3	3	3	3	3	3	3
12286	1	1	21	1	6	0	0	0	1	0	1	0	0	0	0	1	1	0	1	0	0	0	1	1	1	0	0	1	1	4	5	5	5	4	3	2	4	4	1	2	3	5	2	4	3	3	3	3	4
12287	1	2	45	2	5	1	0	1	0	1	1	0	0	1	0	1	0	1	1	1	0	1	1	0	0	1	1	1	1	5	4	4	5	4	5	4	5	5	5	5	5	5	5	4	5	5	2	4	3
12288	1	2	39	2	7	1	0	0	1	1	0	0	0	1	0	0	1	1	0	0	0	0	0	1	1	1	1	0	0	4	5	5	5	5	5	5	5	5	5	3	5	3	3	5	3	4	4	5	5
12289	1	2	33	1	5	1	0	1	0	1	0	1	0	1	0	1	0	1	0	0	0	1	1	0	0	1	1	0	0	4	4	5	5	5	4	5	5	5	4	4	4	4	4	5	4	4	4	5	5
12290	1	1	23	1	6	1	1	0	0	1	0	1	0	1	1	0	0	1	0	1	0	0	0	0	0	1	1	0	0	5	5	5	5	5	5	5	5	5	4	4	4	5	5	5	5	5	4	4	5
12402	1	2	39	2	7	0	0	1	1	1	1	0	0	0	0	1	1	0	1	0	0	1	1	1	1	1	0	1	1	1	1	2	1	2	2	1	1	2	3	3	3	3	2	4	3	4	3	4	3
12403	1	1	41	2	7	1	0	0	1	1	0	1	0	1	0	0	1	1	0	1	0	0	0	1	1	1	1	0	0	3	3	4	4	4	4	3	4	3	4	4	5	4	5	5	5	4	4	4	4
12404	1	2	48	2	7	1	0	0	1	1	1	1	0	1	0	0	1	1	1	1	0	0	0	1	1	1	1	1	1	5	4	5	5	4	5	4	5	5	2	3	5	3	4	5	3	4	3	4	3
12405	1	2	27	1	5	1	1	0	0	1	0	1	0	1	0	0	0	1	1	0	0	0	0	0	0	1	1	0	1	4	5	5	5	4	5	4	4	5	5	4	5	4	4	4	4	4	4	5	5
12406	1	2	37	2	7	0	1	1	0	1	1	0	0	1	1	1	0	1	1	0	0	1	1	0	0	1	1	1	1	5	4	5	4	4	4	4	5	5	5	5	4	5	5	5	5	4	4	5	4
12407	1	2	30	1	5	1	0	1	0	1	1	1	0	1	0	1	0	1	0	0	0	1	1	0	0	1	1	1	0	5	4	5	5	4	4	5	5	5	3	3	4	3	4	4	4	3	4	4	4
12408	1	2	50	2	6	1	1	1	1	1	0	0	0	1	0	1	1	1	0	0	0	1	1	1	1	1	1	0	0	5	4	4	4	5	4	4	5	5	3	3	4	3	4	4	3	4	5	4	4
12409	1	1	50	2	7	1	0	0	1	1	0	0	0	1	0	0	1	1	0	0	0	0	0	1	1	1	1	0	0	4	4	5	5	4	5	5	4	5	4	4	5	5	5	5	4	5	5	4	5
12410	1	1	29	1	5	0	1	0	0	1	0	1	0	1	1	0	0	1	0	0	0	0	0	0	0	1	1	0	0	5	5	5	5	5	5	4	4	5	4	4	3	3	5	5	4	5	4	5	3
12411	1	2	22	1	6	1	0	0	0	1	1	0	0	1	0	0	0	1	1	0	0	0	0	0	0	1	1	1	1	4	5	5	5	5	5	5	4	5	2	1	4	4	3	2	4	5	2	5	5
12412	1	1	39	2	7	1	0	1	1	0	0	0	0	1	0	1	1	0	0	1	0	1	1	1	1	0	0	0	0	5	4	5	5	4	5	4	5	5	3	2	4	4	4	5	3	4	2	4	3
12413	1	1	48	2	7	0	0	1	1	0	0	0	0	0	0	1	1	0	0	0	0	1	1	1	1	0	0	0	0	5	5	5	4	5	5	4	5	4	1	3	4	3	3	5	3	4	3	4	3
12414	1	1	32	1	7	1	0	1	1	1	1	1	0	1	1	1	1	1	1	1	0	1	1	1	1	1	1	1	1	5	4	5	5	5	5	4	4	4	2	1	5	3	2	5	3	4	2	4	3
12415	1	2	35	1	7	1	0	0	0	1	0	1	0	1	0	0	0	1	0	0	0	0	0	0	0	1	1	0	0	5	5	5	4	5	5	4	5	5	5	5	4	4	5	4	5	5	5	4	5
12416	1	1	53	2	7	1	0	1	1	1	1	1	0	1	0	1	1	1	1	1	0	1	1	1	1	1	1	1	1	4	5	5	5	5	5	5	5	4	2	2	4	3	4	5	3	5	2	3	3
12417	1	2	28	1	7	1	0	1	1	1	1	0	0	1	0	1	1	1	1	0	0	1	1	1	1	1	1	1	1	4	5	5	5	4	5	5	5	5	1	1	4	2	3	5	2	4	1	4	3
12418	1	2	23	1	7	1	1	0	0	1	1	1	0	1	1	0	0	1	0	1	0	0	0	0	0	1	1	1	0	5	5	5	5	5	5	5	5	5	2	5	5	5	5	5	4	5	2	4	5
12419	1	1	25	1	6	1	1	0	1	1	1	1	0	1	1	0	1	1	1	1	0	0	0	1	1	1	1	1	1	5	5	4	5	2	4	4	3	5	3	4	4	3	4	5	4	4	4	5	4
12420	1	1	28	1	7	0	1	0	1	1	0	1	0	0	1	0	1	1	0	1	0	0	0	1	1	1	1	0	0	4	4	5	4	5	5	4	4	4	3	5	4	4	4	5	3	3	4	4	5
12421	1	2	26	1	5	1	1	0	0	1	0	1	0	1	1	0	0	1	0	1	0	0	0	0	0	1	1	0	0	2	1	1	1	3	1	3	1	1	3	4	4	4	4	3	3	5	4	4	5
12422	1	1	28	1	7	1	1	0	1	1	0	1	0	1	1	0	0	1	1	1	0	0	0	1	0	1	1	0	1	3	3	3	4	3	5	5	4	4	3	3	3	4	3	4	4	3	3	4	3
12423	1	2	38	2	6	1	0	1	0	1	1	1	0	1	0	1	0	1	0	0	0	1	1	0	0	1	1	1	0	5	4	5	4	4	5	4	5	5	4	4	4	5	5	5	4	4	4	4	5
12424	1	1	29	1	5	1	0	0	1	1	0	1	0	1	0	0	0	1	0	1	0	0	0	1	0	1	1	0	0	4	5	4	4	5	5	5	4	5	4	4	5	5	4	5	4	5	4	5	5
12425	1	1	25	1	6	1	1	0	1	0	0	0	0	1	1	0	1	0	0	0	0	0	0	1	1	0	0	0	0	5	4	1	5	1	5	5	4	5	5	4	4	5	5	4	5	5	4	4	5
12426	1	2	37	2	6	1	1	1	0	1	0	0	0	1	0	1	0	1	0	0	0	1	1	0	0	1	1	0	0	5	5	5	4	4	5	5	5	4	5	5	4	5	5	5	5	5	4	5	4
12427	1	2	42	2	6	1	0	0	0	1	0	1	0	1	0	0	0	1	1	1	0	0	0	0	0	1	1	0	1	5	5	4	5	5	4	5	4	5	4	5	4	4	5	5	5	5	5	4	5
12428	1	2	50	2	7	1	0	0	0	1	0	1	0	1	1	0	0	1	0	1	0	0	0	0	0	1	1	0	0	4	4	5	4	5	5	5	4	4	4	4	4	5	4	5	4	5	4	5	4
12429	1	2	40	2	5	1	1	0	0	1	1	1	0	1	0	0	0	1	0	0	0	0	0	0	0	1	1	1	0	5	5	5	4	5	5	5	5	5	4	4	3	5	4	4	4	4	4	4	4
12430	1	2	37	2	7	1	0	0	0	1	1	1	0	1	0	0	0	1	1	1	0	0	0	0	0	1	1	1	1	5	5	5	5	4	3	5	5	5	3	3	4	4	4	4	4	4	3	3	4
12431	1	1	45	2	7	1	1	0	1	1	1	1	0	1	0	0	1	1	0	0	0	0	0	1	1	1	1	1	0	5	5	5	5	5	4	5	4	5	4	4	4	4	4	5	4	5	4	5	4
12432	1	1	39	2	6	1	1	1	0	0	0	1	0	1	1	1	1	0	0	1	0	1	1	0	1	0	0	0	0	4	5	5	5	5	4	4	4	5	4	4	5	5	5	5	4	4	5	5	5
12433	1	1	38	2	6	1	1	0	0	1	0	0	0	1	1	1	0	1	0	1	0	0	1	0	0	1	1	0	0	4	5	5	5	4	5	5	5	4	4	4	5	5	4	5	5	5	4	5	4
12434	1	2	35	1	6	1	0	1	1	1	0	0	0	1	0	1	1	1	1	0	0	1	1	1	1	1	1	0	1	5	4	5	5	4	4	4	5	5	5	5	5	4	4	5	5	5	5	5	4
12435	1	1	41	2	6	1	0	0	0	1	0	1	0	0	1	0	1	0	1	1	0	0	0	0	1	1	0	0	1	4	5	4	4	5	4	4	5	5	5	4	5	5	4	5	4	5	5	4	4
12436	1	2	33	1	5	1	0	0	0	1	0	1	0	1	0	0	1	1	0	1	0	0	0	0	1	1	1	0	0	5	5	5	4	5	4	5	4	4	5	5	5	4	4	4	5	5	5	5	5
12437	1	2	30	1	5	1	1	0	0	0	0	1	0	1	1	0	0	1	0	0	0	0	0	0	0	0	1	0	0	5	5	5	5	5	4	3	5	5	3	3	4	4	4	4	3	3	3	4	4
12438	1	1	36	2	6	1	1	0	1	1	0	0	0	0	0	0	1	1	1	1	0	0	0	1	1	1	1	0	1	5	4	5	4	5	5	5	4	4	5	5	5	5	4	4	5	4	5	5	5
12439	1	1	32	1	7	1	0	1	0	0	0	1	0	0	1	1	1	0	0	0	0	1	1	0	1	0	0	0	0	4	5	4	5	4	5	5	5	4	5	5	5	4	4	4	5	5	4	4	5
12440	1	1	31	1	7	1	0	1	0	1	0	1	0	1	1	1	0	1	0	1	0	1	1	0	0	1	1	0	0	5	5	5	4	5	4	5	5	5	5	5	5	5	5	4	5	5	4	5	5
12501	1	2	52	2	5	1	1	1	1	1	1	1	0	1	1	1	1	1	1	1	0	1	1	1	1	1	1	1	1	5	5	5	5	5	5	5	5	5	5	5	5	5	5	5	5	5	5	5	5
12502	1	2	29	1	6	1	1	1	0	1	0	1	0	1	1	1	0	1	1	1	0	1	1	0	0	1	1	0	1	5	5	5	5	4	5	5	5	5	5	5	5	4	4	4	4	5	5	5	4
12503	1	1	45	2	5	1	0	0	1	1	0	0	0	1	0	0	0	1	1	0	0	0	0	1	0	1	1	0	1	5	5	2	5	5	5	5	5	1	5	5	5	5	5	5	5	5	5	5	5
12504	1	1	31	1	7	1	0	0	1	1	0	0	0	1	0	0	0	0	0	0	0	0	0	1	0	1	0	0	0	5	5	4	5	5	4	5	5	5	1	1	1	3	1	3	1	1	1	2	3
12505	1	1	30	1	6	1	0	1	1	1	1	1	0	1	0	1	1	1	1	1	0	1	1	1	1	1	1	1	1	5	5	5	5	4	5	4	5	5	5	5	5	5	5	5	5	5	5	5	5
12506	1	2	23	1	6	1	1	0	1	1	1	1	0	1	1	0	1	1	1	1	0	0	0	1	1	1	1	1	1	5	5	5	5	5	3	3	5	5	4	4	4	4	4	5	3	3	4	4	4
12507	1	1	47	2	7	1	1	0	0	1	0	1	0	1	0	0	1	0	0	1	0	0	0	0	1	1	0	0	0	5	5	5	5	5	5	5	5	5	5	4	5	5	4	5	5	5	5	5	5
12508	1	2	23	1	6	1	1	1	0	1	1	0	0	1	1	1	0	1	1	1	0	1	1	0	0	1	1	1	1	5	4	5	5	4	4	5	5	5	4	4	4	4	4	5	4	5	4	4	4
12510	1	2	22	1	6	1	1	1	0	0	0	1	0	1	1	1	0	1	1	1	0	1	1	0	0	0	1	0	1	5	5	5	5	4	5	3	5	5	4	4	5	4	5	5	4	3	4	4	5
12511	1	1	18	1	6	1	1	0	1	0	0	1	0	0	0	0	1	1	1	0	0	0	0	1	1	0	1	0	1	5	5	5	5	5	5	5	5	5	5	5	5	5	5	5	5	5	5	5	5
12512	1	1	23	1	7	1	0	1	1	1	1	0	0	0	0	0	1	1	0	0	0	1	0	1	1	1	1	1	0	5	4	5	5	5	5	5	5	4	5	5	5	5	5	5	5	5	5	5	5
12513	1	2	25	1	7	1	1	1	1	1	1	1	0	1	1	1	1	1	1	1	0	1	1	1	1	1	1	1	1	4	5	5	5	4	4	5	5	5	5	5	5	5	5	5	5	5	5	5	5
12514	1	1	28	1	6	1	1	1	1	1	1	1	0	0	1	0	1	1	1	1	0	1	0	1	1	1	1	1	1	5	5	5	5	4	4	4	5	5	4	4	4	4	4	5	4	4	3	4	4
12515	1	2	47	2	5	1	1	0	0	1	1	1	0	1	1	1	0	1	1	1	0	0	1	0	0	1	1	1	1	5	5	5	5	5	5	5	5	5	5	4	5	5	5	5	5	5	5	5	5
12516	1	2	26	1	5	1	0	1	0	1	1	1	0	1	0	1	0	1	0	1	0	1	1	0	0	1	1	1	0	5	4	4	5	4	5	5	5	5	4	4	5	4	5	5	4	4	3	4	3
12517	1	1	23	1	6	1	0	0	1	0	0	1	0	1	1	0	1	0	0	1	0	0	0	1	1	0	0	0	0	5	5	5	5	4	5	5	5	5	5	5	5	5	5	5	5	5	5	5	5
12518	1	2	23	1	6	1	0	0	0	1	0	1	0	0	1	1	0	0	0	0	0	0	1	0	0	1	0	0	0	5	5	5	5	5	5	4	5	5	4	5	4	4	5	5	5	5	4	5	5
12519	1	2	24	1	6	1	1	0	1	0	1	0	0	0	1	0	0	1	1	1	0	0	0	1	0	0	1	1	1	4	5	4	5	4	4	5	4	5	4	4	5	4	4	5	5	4	4	4	4
12520	1	1	36	2	5	0	0	1	0	1	0	0	0	1	0	0	0	1	0	0	0	1	0	0	0	1	1	0	0	5	5	4	5	3	3	3	4	5	2	2	2	3	3	4	4	2	2	4	4
12521	1	2	21	1	5	1	0	0	0	1	0	0	0	0	1	0	0	0	0	0	0	0	0	0	0	1	0	0	0	2	1	1	1	1	1	1	1	1	4	4	3	3	4	4	4	4	4	4	3
12522	1	1	24	1	5	0	0	0	1	0	1	0	0	1	1	0	0	0	0	0	0	0	0	1	0	0	0	1	0	2	1	1	1	2	2	1	2	1	1	5	3	1	3	5	2	4	4	3	3
12523	1	1	43	2	5	0	1	0	1	0	1	0	0	0	1	0	1	0	1	0	0	0	0	1	1	0	0	1	1	5	5	4	4	5	4	5	5	4	2	2	4	1	3	4	3	4	2	4	2
12524	1	2	22	1	5	1	1	1	1	1	1	1	0	1	1	0	0	0	1	1	0	1	0	1	0	1	0	1	1	1	2	1	1	2	2	1	1	1	2	2	3	3	4	4	3	4	2	5	4
12525	1	1	38	2	6	1	0	1	1	0	0	0	0	1	0	1	0	1	0	0	0	1	1	1	0	0	1	0	0	5	5	5	5	4	5	5	5	5	2	2	3	3	3	5	2	2	2	2	3
12526	1	1	28	1	5	1	0	0	1	0	0	1	0	1	0	0	1	0	0	0	0	0	0	1	1	0	0	0	0	1	1	1	1	2	1	1	1	1	5	4	5	3	3	3	5	5	1	3	1
12527	1	2	42	2	5	1	0	1	0	1	0	0	0	0	0	1	0	1	0	0	0	1	1	0	0	1	1	0	0	1	1	1	1	1	1	4	1	1	5	5	5	5	5	5	5	5	5	5	5
12528	1	2	28	1	5	0	0	1	1	0	1	0	0	0	0	1	1	0	1	0	0	1	1	1	1	0	0	1	1	5	5	5	5	5	5	5	5	5	4	4	5	4	5	4	4	5	4	5	5
12529	1	2	25	1	5	1	1	1	1	1	1	1	0	1	0	1	1	1	0	0	0	1	1	1	1	1	1	1	0	5	5	5	5	5	5	5	5	5	3	5	4	5	2	5	4	5	5	4	5
12530	1	1	22	1	6	0	1	0	1	0	1	0	0	0	0	0	1	0	1	0	0	0	0	1	1	0	0	1	1	2	1	2	1	3	2	4	2	1	4	4	4	4	4	4	3	4	4	4	4
12531	1	1	21	1	5	0	0	0	1	0	0	0	0	0	0	0	1	0	0	0	0	0	0	1	1	0	0	0	0	1	2	1	1	2	3	3	1	1	3	2	4	3	4	4	2	4	2	4	3
12532	1	1	36	2	5	1	0	1	1	1	0	1	0	0	0	1	1	1	0	0	0	1	1	1	1	1	1	0	0	2	3	1	1	2	2	2	2	1	3	4	2	2	4	2	2	4	3	2	4
12533	1	2	37	2	5	1	0	1	0	1	1	1	0	1	0	1	0	1	0	0	0	1	1	0	0	1	1	1	0	5	5	5	5	5	5	5	5	5	5	5	5	5	5	5	5	5	5	5	5
12534	1	1	26	1	6	1	1	0	0	1	0	1	0	1	1	0	0	1	0	1	0	0	0	0	0	1	1	0	0	5	5	5	5	4	5	5	4	5	3	4	4	4	4	5	4	4	4	4	4
12535	1	2	23	1	7	1	0	1	0	0	0	1	0	1	1	1	0	0	0	0	0	1	1	0	0	0	0	0	0	5	5	5	5	5	5	5	4	5	3	4	4	4	4	4	2	5	5	4	5
12537	1	2	36	2	6	1	0	0	0	1	1	0	0	0	0	0	0	0	1	1	0	0	0	0	0	1	0	1	1	5	5	5	5	5	5	4	5	5	5	5	5	5	5	5	5	5	5	5	5
12538	1	1	50	2	5	1	0	1	0	0	0	0	0	1	0	1	0	0	0	0	0	1	1	0	0	0	0	0	0	5	5	5	5	4	5	5	5	5	4	4	4	4	4	4	4	4	4	4	4
12541	1	2	36	2	6	1	1	0	1	1	0	1	0	1	1	0	0	1	0	0	0	0	0	1	0	1	1	0	0	5	5	5	5	5	5	5	4	5	3	2	4	4	3	5	3	3	3	4	4
12542	1	1	25	1	5	1	0	0	0	1	0	0	0	1	0	0	0	0	1	1	0	0	0	0	0	1	0	0	1	4	4	4	5	3	3	3	4	3	3	3	3	3	3	4	3	3	3	3	3
12543	1	1	37	2	5	0	0	0	0	1	1	0	0	1	1	0	0	1	0	0	0	0	0	0	0	1	1	1	0	5	5	5	4	4	4	4	5	5	4	4	4	4	4	5	4	5	4	4	4
12544	1	1	38	2	6	1	1	0	0	1	0	1	0	1	1	0	0	1	0	1	0	0	0	0	0	1	1	0	0	5	5	4	5	4	5	5	4	5	2	1	1	2	2	3	2	2	5	5	2
12545	1	2	52	2	5	1	0	1	0	0	0	1	0	0	0	1	0	1	0	0	0	1	1	0	0	0	1	0	0	5	5	5	5	4	5	5	5	5	5	5	5	5	5	5	5	5	5	5	5
12550	1	1	36	2	6	1	1	1	1	1	1	1	0	1	1	1	1	1	1	0	0	1	1	1	1	1	1	1	1	4	4	4	5	4	4	3	4	4	2	5	4	4	2	2	4	5	2	4	4
12551	1	2	36	2	6	1	1	1	0	1	1	0	0	1	1	1	0	1	1	0	0	1	1	0	0	1	1	1	1	5	5	5	5	5	5	5	5	5	5	5	5	5	5	5	5	5	5	5	5
12552	1	1	23	1	6	0	0	0	1	1	0	1	0	0	1	0	1	0	0	1	0	0	0	1	1	1	0	0	0	5	5	5	5	5	4	5	5	5	3	4	5	5	4	5	4	4	4	5	4
12553	1	2	18	1	5	1	0	1	0	1	0	1	0	1	1	1	1	1	1	1	0	1	1	0	1	1	1	0	1	4	4	5	5	4	4	5	4	5	4	4	4	4	4	4	4	4	4	4	4
12554	1	1	36	2	6	1	1	1	0	1	1	1	0	1	1	1	0	1	1	1	0	1	1	0	0	1	1	1	1	5	5	5	5	5	5	5	5	5	3	2	4	4	4	4	3	3	2	4	4
12555	1	1	40	2	6	1	0	0	1	1	1	1	0	0	0	0	1	1	1	0	0	0	0	1	1	1	1	1	1	5	5	5	5	5	5	5	5	5	2	2	4	1	4	5	5	5	4	4	3
12556	1	2	37	2	5	1	1	0	0	1	0	0	0	1	0	0	0	1	1	0	0	0	0	0	0	1	1	0	1	5	5	5	5	5	5	5	5	5	4	4	4	4	4	5	4	4	4	4	4
12557	1	2	36	2	5	1	1	1	0	1	0	1	0	1	1	0	0	1	1	1	0	1	0	0	0	1	1	0	1	5	5	5	5	5	5	5	5	5	5	5	5	5	5	5	5	5	5	5	5
12558	1	2	36	2	5	1	1	0	1	1	1	0	0	1	1	0	1	1	1	0	0	0	0	1	1	1	1	1	1	5	5	5	4	4	3	3	5	5	2	3	3	3	2	4	3	2	3	4	3
12560	1	1	40	2	5	1	1	0	0	1	1	1	0	1	1	0	0	1	1	0	0	0	0	0	0	1	1	1	1	1	1	2	1	1	1	1	1	1	4	2	4	5	4	5	4	4	2	4	5
12562	1	2	36	2	5	0	0	1	0	1	0	0	0	0	0	1	0	1	0	0	0	1	1	0	0	1	1	0	0	1	1	1	1	1	1	1	2	1	5	4	5	5	4	5	4	5	5	5	5
12564	1	2	45	2	5	1	1	1	0	1	1	0	0	0	0	1	0	1	0	0	0	1	1	0	0	1	1	1	0	1	1	1	1	3	3	3	2	1	5	5	5	5	5	4	5	5	5	5	5
12565	1	2	36	2	5	1	1	0	0	1	0	0	0	1	0	0	0	1	0	1	0	0	0	0	0	1	1	0	0	4	5	5	5	4	5	5	5	5	5	5	5	4	4	5	5	5	2	4	4
12601	1	2	40	2	6	1	1	0	0	1	1	1	0	1	1	0	0	1	0	1	0	0	0	0	0	1	1	1	0	1	1	1	1	2	1	1	1	1	5	5	4	4	5	5	5	5	5	5	5
12602	1	2	33	1	6	1	0	0	0	1	0	1	0	1	1	0	0	1	0	1	0	0	0	0	0	1	1	0	0	5	5	5	5	5	5	5	5	5	5	5	5	5	5	4	5	5	5	5	5
12603	1	1	40	2	6	1	1	1	1	1	1	1	0	1	1	1	1	1	1	1	0	1	1	1	1	1	1	1	1	4	4	5	4	4	5	5	5	5	5	4	5	4	4	5	5	4	5	5	5
12604	1	1	23	1	5	1	0	1	0	1	0	1	0	1	1	1	0	0	0	1	0	1	1	0	0	1	0	0	0	5	5	5	5	5	5	5	4	5	4	5	5	5	5	5	5	5	5	5	5
12605	1	2	26	1	6	1	1	1	1	1	1	1	0	0	1	1	0	0	1	1	0	1	1	1	0	1	0	1	1	5	5	5	5	4	5	5	5	5	5	5	5	4	5	5	5	5	5	5	4
12607	1	1	30	1	7	0	0	0	0	1	0	1	0	0	0	0	0	1	0	1	0	0	0	0	0	1	1	0	0	5	5	4	5	4	4	5	5	5	4	4	4	3	3	4	3	2	4	2	2
12608	1	2	40	2	7	0	0	0	1	1	0	1	0	1	0	0	1	1	0	1	0	0	0	1	1	1	1	0	0	4	5	5	4	5	4	4	4	5	4	5	4	5	4	4	4	4	4	5	4
12609	1	2	33	1	5	1	0	0	0	1	0	1	0	1	0	0	0	1	0	1	0	0	0	0	0	1	1	0	0	5	5	5	5	5	5	5	4	5	4	4	4	4	5	4	5	5	5	5	5
12610	1	1	40	2	6	1	0	0	1	1	0	1	0	1	0	0	1	1	0	1	0	0	0	1	1	1	1	0	0	4	5	5	5	4	5	5	4	4	4	4	5	4	5	5	5	5	4	5	5
12611	1	1	45	2	6	1	0	1	0	1	0	1	0	1	0	1	0	1	1	1	0	1	1	0	0	1	1	0	1	5	5	4	4	5	4	4	4	4	5	5	5	5	5	5	5	5	5	5	5
12612	1	2	36	2	7	1	1	1	1	1	1	1	0	1	1	1	1	1	1	1	0	1	1	1	1	1	1	1	1	4	5	5	5	4	5	4	4	5	5	4	5	5	5	5	5	5	4	5	4
12613	1	1	43	2	7	1	1	0	1	1	1	1	0	1	0	0	1	1	1	1	0	0	0	1	1	1	1	1	1	5	5	5	5	5	5	5	5	5	5	5	5	5	4	5	5	5	5	5	5
12614	1	1	50	2	6	1	0	0	1	1	1	1	0	0	1	0	1	1	0	1	0	0	0	1	1	1	1	1	0	5	5	5	5	5	4	5	4	4	4	4	4	5	4	4	4	5	4	4	4
12615	1	2	24	1	5	1	0	1	1	1	1	1	0	1	1	1	1	1	1	1	0	1	1	1	1	1	1	1	1	4	5	5	5	4	4	5	4	4	5	5	4	3	3	5	3	3	3	5	5
12616	1	1	25	1	6	1	1	1	1	1	0	0	0	1	0	1	0	1	0	1	0	1	1	1	0	1	1	0	0	5	4	4	5	5	5	4	4	4	4	4	4	5	4	4	4	5	4	4	5
12618	1	2	48	2	6	1	0	1	1	1	1	1	0	1	0	1	0	1	1	1	0	1	1	1	0	1	1	1	1	5	4	5	4	4	4	5	4	5	5	5	5	4	4	5	5	5	5	5	5
12619	1	1	25	1	6	1	0	0	0	1	0	1	0	1	0	0	0	1	0	1	0	0	0	0	0	1	1	0	0	5	4	5	4	5	4	4	5	5	5	4	4	4	4	5	5	4	5	4	4
12620	1	2	27	1	6	1	1	1	1	1	1	1	0	1	1	1	1	1	1	1	0	1	1	1	1	1	1	1	1	5	4	4	5	5	5	5	5	5	5	5	5	4	5	5	5	4	4	4	5
12630	1	1	37	2	5	1	1	1	1	1	1	1	0	1	1	1	1	1	1	1	0	1	1	1	1	1	1	1	1	1	1	1	1	1	1	1	1	1	4	5	4	3	3	4	3	5	4	5	4
12631	1	1	38	2	5	1	1	1	1	1	1	1	0	1	1	1	1	1	1	1	0	1	1	1	1	1	1	1	1	5	5	5	4	4	5	5	4	4	5	5	5	4	4	5	4	4	5	5	4
12632	1	2	26	1	5	1	1	0	0	1	1	1	0	1	1	0	0	1	1	1	0	0	0	0	0	1	1	1	1	4	4	5	5	4	5	4	4	5	4	4	4	5	5	4	5	5	5	5	4
12633	1	1	48	2	5	1	0	0	1	1	1	1	0	1	0	0	1	1	1	1	0	0	0	1	1	1	1	1	1	4	4	4	5	5	5	5	5	5	3	3	5	4	5	4	4	5	4	5	5
12634	1	1	22	1	5	1	1	0	1	0	0	1	0	1	0	0	1	0	0	1	0	0	0	1	1	0	0	0	0	5	4	4	5	4	5	5	5	4	4	2	4	5	5	5	5	4	4	4	5
12635	1	1	25	1	7	1	1	0	0	1	0	1	0	1	1	0	0	1	0	1	0	0	0	0	0	1	1	0	0	5	5	5	4	4	4	4	5	5	1	1	3	4	3	5	3	3	3	4	4
12636	1	1	28	1	5	1	1	1	1	1	1	1	0	1	1	1	1	1	1	1	0	1	1	1	1	1	1	1	1	4	5	4	4	3	5	4	3	3	3	3	3	4	4	4	4	3	3	4	4
12637	1	2	27	1	5	1	0	1	0	1	1	1	0	1	1	0	0	1	1	1	0	1	0	0	0	1	1	1	1	4	4	4	4	5	4	5	5	5	3	3	4	4	4	5	4	4	5	4	4
12638	1	1	30	1	5	1	1	1	1	1	1	0	0	1	0	0	0	1	0	1	0	1	0	1	0	1	1	1	0	5	5	4	4	5	4	3	4	4	4	4	4	4	5	5	5	5	5	5	4
12639	1	2	41	2	6	1	1	1	0	1	1	1	0	1	1	1	0	1	1	1	0	1	1	0	0	1	1	1	1	4	5	4	5	5	4	4	4	5	4	4	4	5	5	4	4	5	5	4	4
12640	1	2	37	2	6	1	1	1	0	1	1	1	0	1	1	1	0	1	1	1	0	1	1	0	0	1	1	1	1	5	4	4	4	5	5	5	5	4	5	5	4	4	5	4	4	5	3	5	4
12641	1	2	36	2	6	1	1	1	0	1	1	1	0	1	1	1	0	1	1	1	0	1	1	0	0	1	1	1	1	5	4	5	5	5	4	4	4	5	4	5	5	5	4	5	4	4	4	4	5
12642	1	2	24	1	5	1	1	0	0	1	1	1	0	1	1	0	0	1	1	1	0	0	0	0	0	1	1	1	1	5	5	4	4	5	4	5	4	4	4	4	4	5	5	5	5	4	5	4	5
12643	1	1	52	2	7	1	1	0	1	1	1	1	0	1	1	0	1	1	1	1	0	0	0	1	1	1	1	1	1	4	4	5	4	5	4	5	5	5	5	4	4	4	4	5	5	4	5	5	4
12644	1	2	30	1	6	1	1	1	0	1	1	1	0	1	1	1	0	1	1	1	0	1	1	0	0	1	1	1	1	4	5	5	4	4	4	5	4	5	5	4	4	4	5	5	4	5	4	5	5
12645	1	1	36	2	6	1	1	1	1	1	1	1	0	1	1	1	1	1	1	1	0	1	1	1	1	1	1	1	1	4	4	4	5	4	4	5	5	5	5	4	4	4	5	5	4	4	4	4	5
12646	1	1	37	2	6	1	1	1	1	1	1	1	0	1	1	1	1	1	1	1	0	1	1	1	1	1	1	1	1	5	5	4	5	4	4	5	4	5	4	5	5	5	4	5	4	4	4	4	5
12647	1	2	29	1	6	1	1	1	1	1	1	1	0	1	1	1	1	1	1	1	0	1	1	1	1	1	1	1	1	4	5	5	4	5	4	4	4	5	5	5	4	4	5	4	5	5	5	4	5
12648	1	2	37	2	6	1	1	1	0	1	1	1	0	1	1	1	0	1	1	1	0	1	1	0	0	1	1	1	1	4	5	5	4	4	4	5	5	5	4	4	5	4	5	5	4	5	5	5	4
12649	1	2	36	2	6	1	1	1	1	1	1	1	0	1	1	1	1	1	1	1	0	1	1	1	1	1	1	1	1	5	4	5	5	4	4	4	5	5	5	4	4	5	5	4	4	5	4	5	4
12671	1	1	42	2	7	1	0	0	0	1	0	1	0	1	0	0	0	1	1	1	0	0	0	0	0	1	1	0	1	5	4	4	4	5	5	5	5	4	4	4	5	5	4	5	5	5	4	4	5
12760	1	1	25	1	6	1	1	0	1	1	0	1	0	1	1	0	1	1	0	1	0	0	0	1	1	1	1	0	0	4	4	3	3	3	3	3	4	4	4	3	4	4	4	4	3	4	4	5	4
12761	1	1	55	2	5	1	0	1	0	1	0	0	0	1	0	1	0	1	0	0	0	1	1	0	0	1	1	0	0	3	5	4	4	5	4	4	4	5	4	5	2	2	4	5	5	4	4	4	3
12762	1	1	34	1	7	0	1	0	1	1	0	0	0	0	1	0	1	1	0	0	0	0	0	1	1	1	1	0	0	2	1	1	2	1	1	1	3	1	4	4	4	4	4	4	4	4	4	4	4
12763	1	2	41	2	5	1	0	0	0	1	0	0	0	1	0	0	0	1	0	0	0	0	0	0	0	1	1	0	0	4	5	4	4	5	5	4	4	5	4	5	4	4	4	5	4	4	2	4	4
12764	1	2	18	1	5	1	0	0	0	1	0	1	0	1	0	0	0	1	0	1	0	0	0	0	0	1	1	0	0	4	4	5	5	5	4	4	5	4	4	4	5	4	4	5	4	5	4	4	4
12765	1	2	54	2	5	1	1	1	0	1	0	1	0	1	1	1	0	1	0	1	0	1	1	0	0	1	1	0	0	5	4	5	4	4	3	4	4	4	4	4	4	4	4	5	4	5	5	4	4
12766	1	1	18	1	5	1	0	0	0	1	0	1	0	1	0	0	0	1	0	1	0	0	0	0	0	1	1	0	0	4	5	5	4	4	4	4	4	5	4	4	5	4	4	5	5	5	4	5	4
12770	1	1	52	2	5	1	1	0	0	0	0	0	0	0	0	0	0	1	0	0	0	0	0	0	0	0	1	0	0	4	4	5	5	5	5	5	4	4	5	3	3	4	4	4	5	5	5	4	5
12771	1	2	55	2	6	1	0	1	0	1	0	0	0	1	0	1	0	0	0	0	0	1	1	0	0	1	0	0	0	4	4	4	5	3	4	4	5	5	5	4	4	4	4	4	5	5	4	5	5
12772	1	2	50	2	5	0	0	1	0	1	0	0	0	0	0	0	0	1	0	0	0	1	0	0	0	1	1	0	0	5	5	5	5	5	5	4	5	5	5	5	4	4	4	5	4	4	4	5	4
12773	1	2	29	1	5	1	1	0	0	0	0	0	0	1	0	0	0	1	0	1	0	0	0	0	0	0	1	0	0	2	3	3	3	3	3	2	2	3	3	4	5	4	4	3	4	5	4	4	4
12774	1	1	24	1	7	0	0	0	0	1	0	0	0	1	0	0	0	0	0	0	0	0	0	0	0	1	0	0	0	5	5	5	5	5	5	5	5	5	5	5	5	5	5	5	5	5	3	3	3
12775	1	1	23	1	7	1	1	0	0	0	0	1	0	1	1	0	0	1	0	1	0	0	0	0	0	0	1	0	0	4	5	4	4	4	5	4	5	5	3	4	4	4	4	5	4	4	1	4	3
12776	1	1	18	1	7	0	0	0	0	0	0	0	1	1	0	0	0	1	0	1	0	0	0	0	0	0	1	0	0	4	5	4	4	4	5	5	4	4	2	2	3	3	3	4	3	3	4	4	3
22001	2	2	29	1	5	1	0	1	0	1	0	1	0	1	0	1	0	1	0	0	0	1	1	0	0	1	1	0	0	5	5	5	5	4	5	4	4	5	4	4	4	5	5	4	4	5	5	4	4
22002	2	1	32	1	6	0	1	0	1	0	0	0	0	0	0	0	1	0	0	0	0	0	0	1	1	0	0	0	0	5	4	5	5	4	4	4	5	4	2	2	4	4	3	5	4	4	2	4	4
22003	2	2	44	2	6	0	0	0	0	1	1	0	0	0	0	0	0	1	0	0	0	0	0	0	0	1	1	1	0	4	5	5	5	5	5	4	4	5	2	2	3	4	5	4	4	4	5	4	3
22004	2	2	30	1	6	1	0	1	0	0	0	1	0	1	0	1	0	0	0	0	0	1	1	0	0	0	0	0	0	5	5	5	5	4	4	4	4	5	4	4	4	4	5	5	4	5	4	5	4
22005	2	1	48	2	7	0	0	0	1	0	0	0	0	0	0	0	1	0	0	0	0	0	0	1	1	0	0	0	0	4	4	5	5	5	5	5	4	4	3	4	4	4	4	5	4	4	4	4	4
22006	2	2	32	1	6	1	0	1	0	1	0	0	0	1	1	1	0	1	0	0	0	1	1	0	0	1	1	0	0	4	4	5	5	5	5	5	4	5	4	5	5	5	4	4	4	5	5	4	4
22007	2	1	28	1	7	1	0	0	1	0	0	0	0	0	0	0	1	0	0	0	0	0	0	1	1	0	0	0	0	4	5	5	5	4	5	4	5	4	4	5	4	5	5	4	4	4	4	5	4
22008	2	1	39	2	6	0	0	0	1	0	0	0	0	0	0	0	1	0	0	0	0	0	0	1	1	0	0	0	0	5	4	5	5	4	4	4	5	4	4	4	5	4	4	5	4	5	5	4	4
22009	2	2	46	2	5	1	0	0	0	1	0	0	0	1	0	0	0	1	0	1	0	0	0	0	0	1	1	0	0	4	5	4	5	5	4	4	5	5	2	3	5	4	4	4	4	5	3	4	4
22010	2	2	28	1	6	1	1	1	0	1	0	0	0	1	0	1	0	1	0	1	0	1	1	0	0	1	1	0	0	5	4	4	5	5	5	4	4	5	4	4	5	4	5	4	3	4	2	4	4
22011	2	2	31	1	5	1	0	1	0	1	0	0	0	1	1	1	0	1	0	0	0	1	1	0	0	1	1	0	0	5	4	4	4	5	4	4	4	4	4	4	4	4	4	4	5	5	4	5	4
22012	2	1	30	1	6	1	0	1	0	0	0	0	0	1	0	1	1	0	0	0	0	1	1	0	1	0	0	0	0	5	4	4	4	5	5	5	4	5	4	4	4	5	4	4	4	5	4	4	5
22013	2	1	33	1	6	0	1	1	1	0	0	0	0	0	1	1	1	0	0	0	0	1	1	1	1	0	0	0	0	5	5	3	4	3	5	4	3	4	1	2	4	4	4	5	4	5	2	4	4
22014	2	2	40	2	5	1	0	0	0	1	0	0	0	1	0	0	0	1	0	0	0	0	0	0	0	1	1	0	0	5	5	5	5	4	4	5	4	5	2	3	4	4	3	2	4	4	4	4	3
22015	2	1	32	1	7	1	0	0	1	0	0	0	0	0	0	0	1	1	0	0	0	0	0	1	1	0	1	0	0	4	5	4	5	4	5	5	4	5	3	5	4	4	5	4	5	5	4	4	5
22016	2	2	26	1	6	1	0	1	0	1	0	0	0	1	0	1	0	1	0	0	0	1	1	0	0	1	1	0	0	5	4	4	5	4	5	4	5	5	5	5	4	4	4	4	4	5	5	5	4
22017	2	2	50	2	5	1	0	0	0	1	0	0	0	1	0	1	0	1	0	0	0	0	1	0	0	1	1	0	0	5	4	5	5	4	5	5	4	4	4	4	4	5	4	5	4	4	4	4	4
22018	2	2	49	2	6	1	0	0	0	1	0	0	0	1	0	0	0	1	0	0	0	0	0	0	0	1	1	0	0	4	5	5	5	5	4	5	5	5	3	3	4	4	5	4	4	4	4	5	4
22019	2	1	28	1	5	0	0	1	1	0	0	0	0	0	0	1	1	0	0	0	0	1	1	1	1	0	0	0	0	5	4	5	5	4	5	5	5	4	2	2	4	4	4	4	4	5	3	4	4
22020	2	1	33	1	7	1	0	0	1	0	0	0	0	0	0	0	1	0	0	0	0	0	0	1	1	0	0	0	0	4	4	5	4	5	5	4	5	5	4	5	5	4	5	4	5	4	3	4	4
22021	2	2	37	2	6	1	0	0	0	1	1	0	0	1	1	0	0	1	1	0	0	0	0	0	0	1	1	1	1	5	4	4	5	4	4	5	5	5	3	3	3	4	4	4	4	4	4	4	4
22022	2	1	45	2	6	1	0	0	1	0	0	0	0	1	0	0	1	0	0	0	0	0	0	1	1	0	0	0	0	5	5	4	5	5	5	5	4	5	5	5	5	4	4	4	4	4	4	4	4
22023	2	2	44	2	5	1	0	0	0	1	0	0	0	1	0	0	0	1	0	0	0	0	0	0	0	1	1	0	0	5	5	5	5	4	4	5	5	5	5	4	4	4	5	4	5	4	3	3	3
22024	2	1	27	1	6	0	0	0	1	0	0	0	0	0	0	0	1	0	0	0	0	0	0	1	1	0	0	0	0	4	4	4	5	5	5	5	4	5	3	5	5	4	4	4	4	5	4	4	4
22026	2	1	30	1	7	1	0	1	1	0	0	0	0	0	0	1	1	0	0	0	0	1	1	1	1	0	0	0	0	5	4	5	5	4	5	4	5	5	2	3	5	4	4	4	4	4	3	4	3
22027	2	2	26	1	5	1	0	1	0	0	0	0	0	1	0	1	0	0	0	0	0	1	1	0	0	0	0	0	0	5	5	5	5	5	4	4	4	5	4	4	3	3	5	4	5	4	3	4	4
22028	2	1	43	2	6	0	0	0	1	0	0	0	0	0	0	0	1	0	0	0	0	0	0	1	1	0	0	0	0	4	5	5	5	5	5	4	4	5	3	3	4	4	4	4	5	5	5	5	4
22029	2	2	30	1	6	1	0	1	0	1	0	0	0	1	0	1	0	1	0	0	0	1	1	0	0	1	1	0	0	5	5	5	5	4	4	4	4	4	2	2	4	3	3	4	3	4	3	4	3
22030	2	1	42	2	7	1	0	0	1	0	0	0	0	1	0	0	1	0	0	0	0	0	0	1	1	0	0	0	0	4	5	4	5	5	5	5	4	5	2	3	3	3	3	5	4	4	3	4	4
22031	2	2	27	1	5	1	0	1	0	1	0	0	0	1	0	1	0	1	1	0	0	1	1	0	0	1	1	0	1	4	5	5	5	5	5	5	4	5	2	3	4	4	4	4	4	5	4	5	4
22032	2	2	53	2	5	1	0	0	0	1	0	0	0	1	0	0	0	1	0	0	0	0	0	0	0	1	1	0	0	5	5	5	5	5	4	5	4	4	3	4	4	4	4	3	3	4	4	5	4
22033	2	2	34	1	6	1	0	1	0	1	0	0	0	1	0	1	0	1	0	0	0	1	1	0	0	1	1	0	0	4	4	5	5	4	5	4	4	4	3	4	4	4	5	4	4	5	3	4	4
22035	2	1	43	2	7	0	0	0	1	0	0	0	0	0	0	0	1	0	0	0	0	0	0	1	1	0	0	0	0	5	5	5	4	4	4	5	4	5	4	4	4	4	4	5	5	4	4	4	5
22036	2	1	39	2	6	0	0	0	1	1	0	0	0	0	0	0	1	1	0	0	0	0	0	1	1	1	1	0	0	5	5	5	5	4	4	4	5	4	4	5	5	4	4	4	4	5	5	5	4
22039	2	2	28	1	7	1	0	1	0	1	0	0	0	1	0	1	0	1	0	0	0	1	1	0	0	1	1	0	0	5	4	4	4	4	5	5	4	4	4	5	4	4	4	4	5	5	4	4	4
22040	2	1	29	1	7	1	0	1	0	0	0	0	0	1	0	1	0	0	0	0	0	1	1	0	0	0	0	0	0	5	4	5	5	5	4	4	5	5	4	4	4	4	5	4	5	5	3	5	4
22041	2	1	23	1	6	1	0	0	1	0	0	0	0	1	0	0	1	0	0	0	0	0	0	1	1	0	0	0	0	2	2	1	4	3	3	4	2	1	4	4	4	5	4	4	4	5	4	4	5
22042	2	1	41	2	5	0	1	0	0	1	0	1	0	0	1	0	0	1	0	1	0	0	0	0	0	1	1	0	0	5	5	5	5	4	4	5	5	5	4	5	4	3	4	4	3	5	3	2	3
22044	2	2	18	1	5	1	0	1	0	1	0	1	0	1	0	1	0	1	0	0	0	1	1	0	0	1	1	0	0	5	4	4	4	3	3	5	5	4	4	5	5	5	4	4	4	4	4	5	5
22045	2	2	54	2	5	1	1	1	1	1	0	0	0	1	1	1	0	1	1	0	0	1	1	1	0	1	1	0	1	5	5	4	5	5	4	5	4	5	4	4	5	4	5	4	5	4	5	5	5
22046	2	2	19	1	7	1	0	0	0	1	0	1	0	1	0	0	0	1	0	0	0	0	0	0	0	1	1	0	0	4	4	4	4	4	4	4	4	1	5	5	5	4	4	4	5	5	5	5	5
22047	2	1	40	2	7	1	1	1	1	1	1	1	0	1	1	1	1	1	1	1	0	1	1	1	1	1	1	1	1	5	5	5	5	4	5	4	5	4	4	4	4	5	5	4	3	4	5	5	4
22048	2	1	30	1	5	0	0	1	1	0	0	0	0	0	0	1	1	0	0	0	0	1	1	1	1	0	0	0	0	4	5	3	4	4	4	4	3	4	4	3	3	4	3	3	3	4	4	3	4
22049	2	2	42	2	5	1	0	1	1	1	0	0	0	1	0	1	1	1	0	0	0	1	1	1	1	1	1	0	0	4	4	4	5	3	4	3	4	4	3	3	3	4	4	4	2	3	3	3	4
22051	2	2	33	1	5	1	1	1	1	1	0	0	0	1	1	1	1	1	0	1	0	1	1	1	1	1	1	0	0	3	5	4	4	4	5	3	4	4	4	4	3	3	4	4	4	4	3	4	5
22052	2	1	32	1	7	1	1	1	1	1	1	1	0	1	1	1	1	1	1	1	0	1	1	1	1	1	1	1	1	4	3	4	4	3	4	4	5	3	3	3	4	4	3	5	4	4	3	4	5
22053	2	1	37	2	6	1	1	0	1	0	0	0	0	1	1	0	1	0	0	1	0	0	0	1	1	0	0	0	0	4	3	4	3	5	4	4	3	4	3	4	4	3	4	4	4	3	4	3	4
22054	2	2	40	2	5	1	1	0	0	1	0	1	0	1	1	0	1	1	0	1	0	0	0	0	1	1	1	0	0	3	5	4	3	4	4	4	4	4	4	5	3	3	4	4	4	3	3	3	4
22055	2	1	39	2	6	1	0	0	1	1	0	1	0	1	1	0	1	0	0	1	0	0	0	1	1	1	0	0	0	4	3	5	3	4	5	4	4	4	4	4	5	4	3	3	4	4	4	3	5
22056	2	1	43	2	5	1	1	0	1	1	0	1	0	1	1	0	1	1	0	1	0	0	0	1	1	1	1	0	0	3	4	3	4	4	4	5	3	4	4	4	3	4	5	3	4	4	4	5	4
22057	2	1	31	1	5	1	0	0	1	1	0	1	0	1	0	0	1	1	0	1	0	0	0	1	1	1	1	0	0	3	4	4	4	3	5	4	4	4	4	3	3	5	4	4	4	3	3	4	5
22058	2	2	30	1	6	1	1	1	0	1	0	1	0	1	0	1	1	1	0	1	0	1	1	0	1	1	1	0	0	4	4	5	3	3	4	4	3	4	3	3	4	3	4	4	4	5	4	3	4
22059	2	1	29	1	6	1	1	1	0	1	0	1	0	1	1	1	1	1	0	1	0	1	1	0	1	1	1	0	0	4	3	4	4	3	4	3	4	4	3	4	4	3	4	3	4	4	3	4	3
22060	2	2	50	2	7	1	0	0	0	1	0	0	0	1	1	0	0	1	0	1	0	0	0	0	0	1	1	0	0	4	3	5	3	4	4	4	3	4	4	4	3	4	4	3	4	5	5	3	4
22061	2	1	30	1	6	1	0	1	0	1	0	1	0	1	1	1	0	1	0	0	0	1	1	0	0	1	1	0	0	5	4	4	4	4	5	3	3	4	4	4	4	3	3	4	4	4	5	4	3
22062	2	1	33	1	7	1	0	1	1	1	1	0	0	1	1	1	1	1	0	1	0	1	1	1	1	1	1	1	0	2	3	4	3	3	4	4	4	4	4	4	4	3	4	4	5	3	4	4	3
22063	2	1	35	1	5	1	0	1	1	1	0	0	0	1	1	1	1	1	0	1	0	1	1	1	1	1	1	0	0	3	4	4	4	4	3	4	4	4	4	3	4	4	3	4	4	3	3	4	4
22064	2	2	33	1	5	1	0	1	0	1	0	1	0	1	0	1	0	1	0	1	0	1	1	0	0	1	1	0	0	4	4	4	4	4	3	5	3	4	4	3	4	3	4	4	3	5	4	4	4
22065	2	2	30	1	6	1	1	1	0	1	0	0	0	1	0	1	0	1	0	1	0	1	1	0	0	1	1	0	0	4	5	4	3	3	4	3	4	4	3	4	4	4	5	4	3	4	4	4	4
22067	2	2	29	1	7	1	1	0	1	1	0	1	0	1	1	0	1	1	0	1	0	0	0	1	1	1	1	0	0	3	4	4	3	4	3	4	5	4	5	3	4	4	4	3	4	5	3	5	4
22068	2	1	23	1	6	0	1	0	1	0	0	1	0	0	1	0	1	0	0	1	0	0	0	1	1	0	0	0	0	4	5	3	4	3	4	4	4	5	4	5	4	4	5	4	3	3	5	3	4
22069	2	1	27	1	6	1	1	0	1	1	0	1	0	1	1	0	1	1	0	1	0	0	0	1	1	1	1	0	0	3	4	4	4	3	4	4	3	3	3	3	4	4	4	5	5	4	4	4	3
22071	2	2	50	2	7	1	0	0	0	1	0	0	0	1	0	0	0	1	0	1	0	0	0	0	0	1	1	0	0	4	3	4	4	4	4	4	3	4	4	4	3	5	4	5	4	4	5	4	4
22072	2	2	45	2	6	1	1	0	0	1	0	1	0	1	0	0	0	1	0	0	0	0	0	0	0	1	1	0	0	4	3	5	4	4	4	4	4	3	4	3	4	5	4	4	4	3	5	3	4
22073	2	1	53	2	6	1	1	0	1	0	0	0	0	1	1	0	1	0	0	0	0	0	0	1	1	0	0	0	0	4	4	3	4	4	3	5	5	4	4	4	3	4	3	4	4	5	3	4	5
22074	2	1	37	2	6	1	1	0	1	0	0	0	0	1	1	0	1	0	0	0	0	0	0	1	1	0	0	0	0	5	5	4	3	4	4	3	4	4	4	3	5	4	3	4	4	4	3	4	4
22075	2	2	32	1	6	0	0	1	0	1	0	0	0	1	0	1	0	1	0	1	0	1	1	0	0	1	1	0	0	4	4	3	3	3	4	3	4	4	4	4	4	3	3	4	5	3	4	4	4
22076	2	1	39	2	5	1	1	0	0	1	0	1	0	1	0	0	0	1	0	0	0	0	0	0	0	1	1	0	0	4	4	4	4	4	3	3	5	3	3	4	4	2	2	4	3	4	4	3	3
22077	2	1	24	1	6	0	0	0	1	1	0	0	0	1	0	0	1	0	0	0	0	0	0	1	1	1	0	0	0	3	4	2	4	4	5	2	3	3	4	4	3	5	3	4	5	4	5	4	4
22078	2	2	40	2	5	1	0	0	0	1	0	0	0	1	0	0	0	1	0	0	0	0	0	0	0	1	1	0	0	3	4	3	4	4	3	4	4	5	5	4	4	3	4	3	4	3	3	5	2
22079	2	2	31	1	7	1	0	1	0	1	0	0	0	1	0	1	0	1	0	1	0	1	1	0	0	1	1	0	0	4	3	5	3	2	3	2	3	4	2	3	2	3	2	3	4	4	4	4	4
22080	2	2	30	1	6	0	0	1	0	1	0	0	0	1	0	1	0	1	0	0	0	1	1	0	0	1	1	0	0	4	4	4	3	4	3	5	3	3	3	5	3	4	4	2	4	3	3	4	4
22081	2	1	50	2	5	1	0	0	0	1	0	0	0	1	1	0	0	1	0	0	0	0	0	0	0	1	1	0	0	4	3	5	4	4	3	5	4	4	4	4	4	4	3	5	5	3	5	3	4
22082	2	1	27	1	6	0	0	0	1	0	0	0	0	0	1	0	0	0	0	0	0	0	0	1	0	0	0	0	0	5	3	4	3	5	4	4	4	3	3	4	3	5	4	5	4	4	4	4	3
22083	2	1	33	1	6	1	1	0	1	0	0	0	0	1	0	0	0	0	0	1	0	0	0	1	0	0	0	0	0	4	4	3	3	4	4	3	4	4	4	4	3	3	4	4	4	3	3	3	3
22084	2	1	30	1	6	1	0	0	1	0	0	1	0	1	0	0	1	0	0	1	0	0	0	1	1	0	0	0	0	3	4	4	3	4	4	4	3	4	3	5	3	4	4	3	4	4	3	4	4
22085	2	2	28	1	6	1	0	1	0	0	0	1	0	1	0	1	0	0	0	0	0	1	1	0	0	0	0	0	0	4	4	4	3	3	3	3	4	4	4	3	4	3	4	3	3	4	4	4	3
22086	2	2	33	1	6	1	1	1	0	1	0	0	0	1	0	1	0	1	0	0	0	1	1	0	0	1	1	0	0	4	4	4	4	4	3	3	5	3	4	3	4	3	4	5	4	3	4	4	5
22087	2	2	30	1	7	1	0	1	0	0	0	0	0	1	0	1	0	1	0	1	0	1	1	0	0	0	1	0	0	3	3	2	4	4	4	3	2	5	4	3	3	4	3	5	4	4	4	4	4
22089	2	1	39	2	6	1	0	0	0	1	0	0	0	1	0	0	0	1	0	0	0	0	0	0	0	1	1	0	0	3	3	3	4	4	5	4	4	4	4	4	3	4	4	5	3	4	3	3	5
22090	2	1	41	2	5	0	1	0	1	0	0	1	0	1	1	0	1	1	0	1	0	0	0	1	1	0	1	0	0	4	3	3	4	4	4	4	3	3	4	3	4	4	4	3	4	5	4	5	3
22091	2	1	50	2	6	0	1	0	0	1	0	0	0	0	1	0	0	1	0	0	0	0	0	0	0	1	1	0	0	4	3	4	4	4	4	4	3	3	3	4	4	3	5	5	4	4	4	3	5
22092	2	1	51	2	6	1	0	0	0	1	0	1	0	1	0	0	0	1	0	0	0	0	0	0	0	1	1	0	0	5	5	5	4	3	4	4	4	4	3	5	4	3	4	4	5	4	3	3	4
22093	2	1	49	2	6	1	1	0	0	1	0	0	0	1	1	0	1	1	0	0	0	0	0	0	1	1	1	0	0	5	4	3	4	3	4	3	4	4	4	5	3	5	3	4	4	4	4	3	5
22094	2	2	37	2	5	1	0	0	0	1	0	0	0	1	1	0	0	0	0	0	0	0	0	0	0	1	0	0	0	4	3	4	4	3	3	3	5	4	5	4	4	3	4	4	3	3	3	5	4
22095	2	2	39	2	7	1	0	0	0	1	0	1	0	1	0	0	0	1	0	0	0	0	0	0	0	1	1	0	0	3	4	3	3	4	5	4	4	4	3	3	5	4	4	3	4	4	3	4	4
22096	2	2	51	2	5	1	0	0	0	1	0	1	0	1	0	0	1	1	0	0	0	0	0	0	1	1	1	0	0	4	4	5	4	5	3	4	5	3	3	4	4	3	3	4	4	4	3	4	5
22097	2	2	52	2	6	1	0	0	0	1	0	1	0	1	0	0	0	1	0	0	0	0	0	0	0	1	1	0	0	3	5	4	4	3	5	4	3	4	4	4	4	3	4	5	4	3	5	4	4
22098	2	2	53	2	6	1	0	0	0	1	0	0	0	1	0	0	1	1	0	0	0	0	0	0	1	1	1	0	0	4	4	4	4	4	3	4	3	3	4	3	4	3	5	4	4	4	4	5	3
22099	2	2	47	2	6	1	0	0	0	1	0	1	0	1	0	0	0	1	0	0	0	0	0	0	0	1	1	0	0	3	5	4	4	3	4	4	3	4	3	4	4	5	4	4	4	3	4	4	4
22101	2	1	43	2	6	1	1	0	1	1	0	1	0	1	0	0	1	1	0	1	0	0	0	1	1	1	1	0	0	5	5	4	4	5	5	5	5	4	4	3	3	4	3	3	4	3	5	3	5
22103	2	1	33	1	5	1	0	0	1	0	0	1	0	1	0	0	1	0	0	0	0	0	0	1	1	0	0	0	0	4	5	4	4	3	4	4	4	4	4	5	4	3	4	3	4	4	4	4	4
22104	2	2	33	1	7	1	0	1	1	1	0	0	0	1	1	1	1	1	0	0	0	1	1	1	1	1	1	0	0	3	4	4	5	4	4	3	4	4	4	4	3	4	4	5	4	4	4	4	4
22105	2	1	40	2	6	1	0	0	0	1	0	0	0	1	0	0	1	1	0	0	0	0	0	0	1	1	1	0	0	4	3	4	4	4	4	3	4	3	4	4	3	5	4	4	3	3	4	3	4
22106	2	1	41	2	7	0	1	0	0	1	0	0	0	0	0	0	1	1	0	0	0	0	0	0	1	1	1	0	0	4	3	4	4	4	4	4	5	3	4	5	3	4	4	4	4	3	5	3	4
22107	2	1	36	2	7	1	0	0	0	1	0	0	0	1	0	0	1	1	0	0	0	0	0	0	1	1	1	0	0	5	3	4	3	4	4	3	5	4	4	3	4	4	4	3	5	4	4	3	3
22108	2	1	28	1	7	1	0	0	0	1	0	0	0	1	0	0	1	1	0	0	0	0	0	0	1	1	1	0	0	3	4	3	5	4	3	4	4	4	4	3	4	4	3	5	4	3	4	3	4
22109	2	2	30	1	7	1	0	1	0	1	0	1	0	1	0	1	0	1	0	0	0	1	1	0	0	1	1	0	0	3	4	3	4	3	4	4	3	5	4	4	5	3	4	5	3	4	4	5	4
22110	2	2	37	2	5	1	1	0	0	1	0	1	0	1	0	0	1	1	0	1	0	0	0	0	1	1	1	0	0	5	4	4	4	3	4	4	3	3	4	4	4	3	4	3	3	4	4	3	4
22111	2	2	38	2	6	1	1	1	0	1	0	0	0	1	1	1	0	1	0	1	0	1	1	0	0	1	1	0	0	4	4	4	3	4	3	4	5	4	4	4	4	3	3	4	5	4	3	4	4
22112	2	2	31	1	5	1	0	1	0	1	0	0	0	1	1	1	0	1	0	1	0	1	1	0	0	1	1	0	0	5	4	3	4	3	3	4	4	4	4	3	4	5	3	3	5	4	3	4	4
22113	2	1	24	1	6	1	1	1	1	0	0	1	0	0	1	1	1	0	0	1	0	1	1	1	1	0	0	0	0	4	5	4	5	5	5	5	5	5	4	5	3	5	4	4	3	3	4	4	4
22114	2	2	42	2	6	1	0	1	0	1	0	1	0	1	0	1	0	1	0	1	0	1	1	0	0	1	1	0	0	5	5	5	5	4	4	5	5	5	5	4	3	4	3	3	3	5	5	5	4
22115	2	2	41	2	5	1	0	0	0	1	0	1	0	1	0	0	0	1	0	0	0	0	0	0	0	1	1	0	0	4	5	5	5	4	5	4	5	5	5	5	4	3	4	3	4	3	5	4	3
22116	2	1	53	2	5	1	0	0	1	1	0	1	0	1	0	0	1	1	0	0	0	0	0	1	1	1	1	0	0	5	4	4	5	5	5	5	4	4	5	5	4	4	4	5	5	3	5	4	5
22117	2	1	43	2	6	1	1	0	1	1	0	1	0	1	0	0	1	1	0	1	0	0	0	1	1	1	1	0	0	5	5	5	5	5	4	4	5	5	4	5	4	4	3	3	3	4	4	5	4
22118	2	1	22	1	6	1	1	0	0	1	0	1	0	1	1	0	1	0	0	1	0	0	0	0	1	1	0	0	0	5	4	5	5	5	4	5	4	5	4	4	5	5	4	4	3	3	5	5	4
22120	2	2	25	1	5	1	1	1	0	0	0	1	0	1	1	1	0	0	0	1	0	1	1	0	0	0	0	0	0	5	5	5	5	5	5	5	4	5	5	4	5	4	4	4	5	3	5	5	5
22121	2	2	22	1	5	1	1	1	1	0	0	1	0	1	0	1	1	0	0	1	0	1	1	1	1	0	0	0	0	4	5	5	4	4	4	5	5	4	5	5	4	4	4	4	5	3	4	5	5
22122	2	2	25	1	5	1	0	1	0	1	0	0	0	1	0	1	0	0	0	0	0	1	1	0	0	1	0	0	0	5	4	5	4	5	5	5	3	4	3	4	4	4	4	4	4	3	2	3	4
22123	2	2	38	2	5	1	1	1	1	1	1	1	0	1	1	1	0	1	0	1	0	1	1	1	0	1	1	1	0	4	4	3	4	4	4	3	4	4	4	4	4	4	4	5	4	4	4	4	5
22124	2	2	42	2	5	1	1	1	0	1	1	1	0	1	0	1	0	1	0	0	0	1	1	0	0	1	1	1	0	5	4	5	5	5	4	5	5	4	3	4	4	5	5	5	5	1	3	5	4
22125	2	2	39	2	5	1	0	0	0	1	0	1	0	1	0	0	0	1	0	1	0	0	0	0	0	1	1	0	0	5	4	4	5	4	5	5	4	5	5	4	4	5	5	3	4	4	4	4	5
22126	2	1	39	2	5	1	0	0	1	1	0	0	0	1	0	0	1	0	0	0	0	0	0	1	1	1	0	0	0	5	4	5	5	5	4	4	5	5	5	5	4	4	4	3	3	4	5	4	4
22127	2	2	37	2	5	1	0	0	0	1	0	0	0	1	1	0	0	1	0	0	0	0	0	0	0	1	1	0	0	4	5	4	4	4	5	5	5	5	5	5	5	4	4	3	4	5	5	4	4
22128	2	1	19	1	5	1	0	0	1	0	0	1	0	1	0	0	1	0	0	0	0	0	0	1	1	0	0	0	0	4	5	4	5	4	4	5	4	5	5	4	5	3	3	3	3	3	5	5	4
22129	2	1	41	2	5	1	1	0	1	0	0	1	0	0	1	0	1	0	0	1	0	0	0	1	1	0	0	0	0	4	4	5	5	4	4	5	5	5	4	4	4	3	4	4	5	5	4	4	3
22130	2	2	22	1	5	1	0	0	0	1	0	1	0	1	1	0	0	1	0	0	0	0	0	0	0	1	1	0	0	5	5	5	5	4	5	5	5	4	4	4	3	3	3	4	4	3	4	5	3
22131	2	1	30	1	5	1	0	0	1	0	0	0	0	1	0	0	1	0	0	0	0	0	0	1	1	0	0	0	0	5	3	5	4	3	3	3	5	4	3	2	4	4	4	2	3	1	2	2	4
22132	2	1	48	2	6	1	1	0	1	1	0	0	0	1	0	0	1	1	0	0	0	0	0	1	1	1	1	0	0	5	4	4	4	4	5	5	4	4	3	4	3	3	3	4	2	3	4	3	4
22133	2	2	27	1	5	1	0	1	0	1	0	0	0	1	0	1	0	1	0	1	0	1	1	0	0	1	1	0	0	5	4	4	5	4	4	5	4	4	5	5	3	4	3	4	4	4	4	2	3
22135	2	1	23	1	5	1	0	0	1	0	0	0	0	1	0	0	0	0	0	0	0	0	0	1	0	0	0	0	0	5	5	5	5	4	5	4	4	5	3	4	3	3	4	4	5	5	3	4	4
22136	2	2	45	2	6	1	1	0	0	1	0	0	0	1	0	0	0	1	0	0	0	0	0	0	0	1	1	0	0	5	5	5	5	5	4	4	4	5	4	5	3	4	5	4	4	5	4	4	4
22137	2	1	47	2	6	0	0	0	1	0	0	0	0	1	0	0	1	0	0	0	0	0	0	1	1	0	0	0	0	4	4	4	5	3	5	5	4	5	4	5	4	5	5	4	4	4	5	4	4
22138	2	2	27	1	5	1	0	1	0	1	0	0	0	1	0	1	0	1	0	1	0	1	1	0	0	1	1	0	0	4	4	5	4	5	4	4	4	5	4	4	5	4	5	4	4	4	4	4	5
22139	2	1	25	1	5	1	0	0	1	0	0	0	0	0	0	0	1	1	0	0	0	0	0	1	1	0	1	0	0	5	5	4	4	5	4	5	4	4	4	5	3	5	4	4	4	4	4	5	5
22141	2	2	28	1	7	1	0	0	1	1	0	1	0	0	0	0	1	1	0	1	0	0	0	1	1	1	1	0	0	5	5	5	4	4	4	4	5	5	4	5	5	5	4	4	4	5	5	5	5
22143	2	2	24	1	5	1	1	0	1	0	0	1	0	1	0	1	1	0	0	1	0	0	1	1	1	0	0	0	0	5	5	5	5	4	5	5	4	5	2	2	4	4	2	4	4	4	3	4	4
22144	2	2	41	2	6	1	1	1	0	1	0	1	0	0	1	1	0	0	0	1	0	1	1	0	0	1	0	0	0	4	5	4	5	5	5	5	5	5	4	5	5	2	4	4	5	3	5	5	3
22145	2	1	45	2	5	1	0	0	1	0	0	1	0	1	0	0	1	0	0	1	0	0	0	1	1	0	0	0	0	5	4	5	5	4	4	3	4	5	3	5	4	4	3	4	3	4	5	5	5
22146	2	2	18	1	5	1	1	1	0	0	0	1	0	1	1	1	0	0	0	1	0	1	1	0	0	0	0	0	0	5	5	5	4	5	4	4	4	5	4	5	4	3	4	5	4	2	4	5	3
22147	2	1	24	1	6	1	0	0	1	1	0	1	0	1	1	0	1	0	0	1	0	0	0	1	1	1	0	0	0	5	5	4	5	5	4	4	4	4	5	4	3	3	3	4	3	4	5	3	2
22148	2	1	32	1	6	1	1	1	1	0	0	1	0	1	0	0	0	1	0	1	0	1	0	1	0	0	1	0	0	5	5	4	4	5	4	4	3	5	5	4	4	4	2	3	4	4	5	4	5
22149	2	2	30	1	5	1	1	1	0	1	0	1	0	1	0	1	0	1	0	1	0	1	1	0	0	1	1	0	0	5	4	5	5	5	4	5	4	4	1	2	4	1	3	5	4	2	2	4	3
22150	2	1	26	1	5	1	1	1	0	1	0	1	0	1	0	1	0	1	0	1	0	1	1	0	0	1	1	0	0	5	5	5	5	5	5	5	5	5	3	5	4	4	4	5	4	4	2	4	4
22151	2	2	24	1	5	1	1	1	0	0	0	1	0	1	0	1	0	1	0	1	0	1	1	0	0	0	1	0	0	4	5	4	5	4	4	5	5	5	5	5	5	4	4	5	4	4	4	4	3
22152	2	1	20	1	5	1	0	0	1	0	0	1	0	1	1	0	1	0	0	1	0	0	0	1	1	0	0	0	0	5	5	5	5	5	5	4	5	5	4	5	3	5	5	3	4	4	5	4	5
22153	2	1	20	1	6	1	1	1	1	1	1	1	0	0	0	0	1	0	0	0	0	1	0	1	1	1	0	1	0	5	5	5	5	5	5	5	5	5	5	4	4	4	3	5	3	3	5	5	3
22154	2	2	18	1	6	1	1	0	0	1	0	1	0	1	1	0	0	1	0	1	0	0	0	0	0	1	1	0	0	5	5	5	5	5	5	5	5	5	3	3	4	4	3	5	4	4	4	4	4
22155	2	2	26	1	5	1	0	1	0	1	0	0	0	1	0	1	0	1	0	0	0	1	1	0	0	1	1	0	0	4	5	4	5	5	4	4	5	5	4	5	3	4	4	5	4	4	5	4	4
22156	2	1	42	2	5	1	0	0	1	0	0	1	0	1	0	0	1	0	0	1	0	0	0	1	1	0	0	0	0	5	5	5	5	5	5	5	5	5	4	5	4	4	5	5	4	3	4	4	4
22157	2	1	39	2	6	1	1	0	1	0	0	0	0	1	0	0	1	0	0	1	0	0	0	1	1	0	0	0	0	5	5	5	5	5	5	5	5	5	3	2	2	4	4	5	3	4	4	4	4
22158	2	2	52	2	5	1	0	0	0	1	0	1	0	1	0	0	0	1	0	0	0	0	0	0	0	1	1	0	0	5	5	4	4	5	4	5	5	5	5	4	5	4	4	5	4	4	4	3	4
22160	2	1	45	2	6	1	1	0	1	0	0	1	0	1	1	0	1	0	0	0	0	0	0	1	1	0	0	0	0	4	5	5	5	5	4	5	5	5	5	5	4	4	4	5	4	2	4	5	4
22161	2	2	48	2	5	1	1	0	0	1	0	1	0	1	0	0	0	1	0	0	0	0	0	0	0	1	1	0	0	5	5	4	4	4	5	4	5	5	4	3	4	4	3	5	4	3	4	4	4
22162	2	2	42	2	5	1	0	0	0	1	0	1	0	1	1	1	0	1	0	1	0	0	1	0	0	1	1	0	0	5	5	5	5	5	5	5	5	5	4	3	4	4	5	5	5	4	4	5	3
22163	2	2	22	1	5	1	1	1	0	0	0	1	0	1	1	1	0	0	0	1	0	1	1	0	0	0	0	0	0	5	5	5	5	4	5	4	4	5	3	3	4	3	4	5	5	4	3	4	3
22164	2	1	46	2	5	0	1	0	1	1	0	1	0	1	0	0	1	0	0	0	0	0	0	1	1	1	0	0	0	4	5	5	5	4	5	4	4	5	4	3	5	3	4	5	2	4	4	5	4
22165	2	2	40	2	6	1	1	0	1	1	0	1	0	1	0	0	1	1	0	1	0	0	0	1	1	1	1	0	0	5	5	5	5	5	5	5	5	5	3	3	4	4	4	4	5	3	3	4	4
22166	2	2	39	2	5	1	1	0	0	1	0	1	0	1	1	0	0	1	0	1	0	0	0	0	0	1	1	0	0	5	5	5	5	5	5	5	5	5	3	3	4	4	4	5	4	4	3	4	4
22167	2	2	19	1	5	1	1	0	0	1	0	1	0	1	0	0	0	1	0	1	0	0	0	0	0	1	1	0	0	5	4	5	4	5	5	5	5	4	3	4	5	4	4	4	4	3	4	4	4
22168	2	1	35	1	7	0	0	0	1	0	0	1	0	0	0	0	1	0	0	1	0	0	0	1	1	0	0	0	0	3	4	5	3	4	3	3	1	4	5	5	5	4	5	5	4	4	3	5	3
22171	2	2	19	1	5	1	0	0	1	1	0	1	0	1	1	0	1	1	0	1	0	0	0	1	1	1	1	0	0	5	5	5	5	5	5	5	5	4	4	4	5	4	5	5	4	5	4	5	4
22172	2	1	22	1	5	0	0	0	1	1	1	1	0	0	0	0	1	1	1	1	0	0	0	1	1	1	1	1	1	1	5	1	5	4	5	5	1	5	5	3	5	4	4	3	4	4	3	4	3
22173	2	2	28	1	7	0	1	1	1	1	0	0	0	0	1	1	1	1	0	1	0	1	1	1	1	1	1	0	0	5	4	5	4	4	4	4	5	4	4	4	4	4	5	5	4	3	5	4	4
22174	2	2	46	2	7	1	1	1	1	1	1	0	0	1	1	1	1	1	1	1	0	1	1	1	1	1	1	1	1	4	5	5	5	5	5	4	5	5	5	4	5	4	4	4	3	4	5	5	4
22175	2	1	37	2	6	1	0	0	0	1	0	0	0	1	1	0	0	1	1	0	0	0	0	0	0	1	1	0	1	1	1	1	1	3	1	1	1	1	4	4	4	4	4	4	4	4	4	5	4
22176	2	1	35	1	5	0	0	1	0	1	0	0	0	0	0	1	0	0	0	0	0	1	1	0	0	1	0	0	0	5	4	3	3	4	3	3	4	4	5	5	5	4	4	3	4	5	2	4	4
22178	2	1	20	1	5	1	1	0	1	1	1	1	0	1	1	0	1	1	1	1	0	0	0	1	1	1	1	1	1	5	4	5	5	5	4	5	5	5	3	3	3	4	4	5	4	3	3	3	4
22179	2	1	55	2	5	1	0	0	0	1	1	1	0	1	0	1	0	1	1	1	0	0	1	0	0	1	1	1	1	4	4	5	5	4	4	3	4	5	4	4	5	4	4	4	5	5	5	5	4
22180	2	2	38	2	6	1	0	0	0	1	1	1	0	1	0	0	0	1	1	1	0	0	0	0	0	1	1	1	1	5	5	5	5	5	5	1	3	5	4	5	4	5	5	5	4	5	4	5	5
22182	2	1	22	1	5	1	0	0	1	1	0	0	0	1	0	0	1	1	0	0	0	0	0	1	1	1	1	0	0	4	5	5	5	4	4	4	5	5	3	3	4	5	5	4	5	4	2	4	5
22184	2	1	37	2	7	1	1	0	1	1	0	1	0	0	1	0	1	1	0	1	0	0	0	1	1	1	1	0	0	4	5	5	4	5	3	2	5	4	4	4	4	4	4	5	5	3	4	5	5
22185	2	1	38	2	6	0	0	0	1	1	0	0	0	1	0	0	0	1	0	0	0	0	0	1	0	1	1	0	0	4	1	4	5	3	2	4	4	5	4	3	4	5	2	4	4	1	3	4	4
22186	2	2	40	2	7	1	0	1	0	1	0	1	0	1	0	1	0	1	0	0	0	1	1	0	0	1	1	0	0	4	5	5	5	4	4	5	5	5	4	5	5	3	3	3	4	4	5	4	3
22187	2	2	39	2	7	1	0	0	0	1	0	0	0	1	0	0	0	1	0	0	0	0	0	0	0	1	1	0	0	5	5	5	4	4	4	5	4	4	4	4	4	5	4	5	4	4	3	4	5
22191	2	1	26	1	6	1	0	0	0	1	0	0	0	1	0	0	0	1	0	1	0	0	0	0	0	1	1	0	0	1	1	1	1	1	2	1	2	1	2	2	3	3	4	3	3	3	2	2	3
22192	2	2	36	2	5	1	0	0	0	1	0	1	0	1	0	0	0	0	0	1	0	0	0	0	0	1	0	0	0	1	1	1	1	1	1	3	1	1	3	1	3	3	3	3	2	3	3	3	3
22193	2	2	30	1	5	1	0	1	0	1	0	0	0	0	0	1	0	0	1	0	0	1	1	0	0	1	0	0	1	1	1	1	1	1	1	1	1	1	5	5	5	5	5	5	5	5	5	5	5
22194	2	1	19	1	5	1	1	0	0	0	0	1	0	1	1	0	1	0	0	0	0	0	0	0	1	0	0	0	0	4	4	3	3	4	4	3	3	4	2	2	2	4	4	4	2	2	3	4	4
22195	2	2	25	1	5	1	0	0	0	1	1	0	0	1	0	1	0	1	0	0	0	0	1	0	0	1	1	1	0	1	1	1	1	1	3	1	1	1	3	3	4	4	4	4	3	4	3	4	4
22196	2	2	47	2	7	1	0	1	0	1	1	1	0	1	0	1	0	1	1	1	0	1	1	0	0	1	1	1	1	5	5	4	5	5	4	5	4	5	4	4	4	3	3	4	5	5	3	4	4
22197	2	2	42	2	5	1	0	1	0	1	1	0	0	1	0	0	0	1	1	1	0	1	0	0	0	1	1	1	1	1	1	1	4	3	4	1	2	1	2	2	3	3	3	3	4	4	4	4	3
22198	2	1	50	2	7	1	0	1	0	1	0	0	0	1	0	1	0	1	0	0	0	1	1	0	0	1	1	0	0	5	5	5	5	4	3	5	5	5	2	2	4	4	4	4	3	4	3	4	5
22199	2	2	19	1	5	1	0	0	0	0	0	1	0	1	0	0	0	1	0	1	0	0	0	0	0	0	1	0	0	4	4	5	5	4	3	3	3	4	4	4	3	3	3	2	2	4	3	4	3
22200	2	1	31	1	5	1	0	0	0	1	0	0	0	1	0	0	0	1	0	0	0	0	0	0	0	1	1	0	0	1	1	1	1	1	1	3	1	1	1	1	3	2	2	5	4	5	2	3	3
22201	2	1	45	2	5	1	1	0	0	1	1	1	0	1	0	0	0	1	0	1	0	0	0	0	0	1	1	1	0	3	4	4	4	5	1	5	4	4	3	2	4	3	4	4	3	3	2	4	4
22203	2	1	37	2	5	1	1	0	0	1	1	1	0	1	1	0	1	1	0	1	0	0	0	0	1	1	1	1	0	5	5	4	5	5	4	3	1	5	3	2	4	3	4	4	2	3	2	4	4
22204	2	2	25	1	6	1	0	1	0	0	0	0	0	1	0	0	0	1	0	0	0	1	0	0	0	0	1	0	0	1	3	1	2	3	2	2	1	1	3	5	4	5	3	5	5	5	4	5	5
22205	2	1	36	2	5	1	1	1	0	1	0	0	0	0	1	1	0	1	0	0	0	1	1	0	0	1	1	0	0	1	1	1	1	3	3	3	2	1	4	5	5	5	4	5	3	5	4	5	5
22207	2	2	37	2	5	1	0	1	0	1	0	1	0	1	0	1	0	1	0	0	0	1	1	0	0	1	1	0	0	4	4	4	4	4	4	3	4	4	3	4	4	3	5	4	4	5	4	4	4
22211	2	2	32	1	5	0	0	1	0	0	0	0	0	0	0	1	0	0	0	0	0	1	1	0	0	0	0	0	0	5	4	4	4	5	4	4	4	5	4	5	4	4	3	3	4	5	2	3	3
22212	2	1	47	2	5	0	0	0	1	0	1	0	0	1	1	0	1	1	0	1	0	0	0	1	1	0	1	1	0	4	5	4	5	4	4	4	4	5	4	4	4	3	3	4	5	3	4	3	4
22213	2	2	54	2	5	1	0	0	0	1	1	1	0	1	0	0	0	0	1	1	0	0	0	0	0	1	0	1	1	4	4	4	4	4	3	4	5	5	4	5	4	3	4	3	5	4	3	3	3
22214	2	2	43	2	5	1	1	0	0	1	1	1	0	1	1	0	0	0	1	1	0	0	0	0	0	1	0	1	1	4	4	5	4	4	5	4	5	4	5	5	5	4	3	3	4	5	5	4	5
22215	2	1	26	1	6	1	0	0	1	0	0	1	0	1	1	0	1	0	0	1	0	0	0	1	1	0	0	0	0	4	4	5	5	4	5	5	4	4	3	4	4	4	4	3	5	4	4	5	4
22216	2	2	27	1	6	1	1	1	0	1	0	1	0	1	1	1	0	1	0	1	0	1	1	0	0	1	1	0	0	4	4	4	4	5	4	4	5	4	4	5	4	3	5	4	4	4	4	4	5
22217	2	1	52	2	6	1	0	0	1	0	0	0	0	1	1	0	1	0	0	1	0	0	0	1	1	0	0	0	0	4	4	4	5	3	4	4	5	5	5	3	4	4	5	3	4	4	4	5	4
22218	2	2	29	1	5	1	1	1	0	1	0	0	0	1	0	1	0	1	0	0	0	1	1	0	0	1	1	0	0	5	3	4	5	5	4	4	4	3	3	5	3	3	3	4	4	4	4	4	4
22219	2	1	33	1	6	1	0	1	0	1	0	0	0	1	0	1	0	1	0	0	0	1	1	0	0	1	1	0	0	5	4	4	4	5	5	4	4	5	5	4	3	3	3	4	4	4	4	3	5
22220	2	1	40	2	6	1	0	0	1	1	0	0	0	1	0	0	1	1	1	0	0	0	0	1	1	1	1	0	1	4	4	4	4	4	3	4	5	5	3	3	4	3	4	4	4	3	3	4	4
22231	2	2	33	1	5	1	0	0	0	1	0	0	0	1	0	0	0	1	0	0	0	0	0	0	0	1	1	0	0	1	1	1	1	3	2	1	1	1	3	1	3	3	3	4	4	3	4	4	3
22232	2	2	34	1	5	1	0	1	0	1	0	0	0	1	0	1	0	1	0	0	0	1	1	0	0	1	1	0	0	1	1	1	1	2	2	1	1	1	4	5	4	3	3	3	3	5	2	2	3
22233	2	2	30	1	5	1	1	0	0	0	0	1	0	1	1	1	0	1	1	1	0	0	1	0	0	0	1	0	1	1	1	1	1	2	2	1	1	1	5	5	4	4	4	2	4	5	3	3	3
22234	2	1	45	2	5	1	0	0	1	1	0	1	0	1	1	0	0	0	1	0	0	0	0	1	0	1	0	0	1	1	1	1	1	2	2	2	2	1	3	4	4	4	4	5	4	4	4	4	4
22235	2	2	42	2	5	1	0	0	0	1	0	0	0	1	0	0	0	1	0	1	0	0	0	0	0	1	1	0	0	2	2	1	2	2	2	1	2	2	4	4	3	4	4	4	3	4	4	3	4
22236	2	2	45	2	5	1	0	0	0	1	0	0	0	1	0	0	0	1	0	0	0	0	0	0	0	1	1	0	0	1	2	1	1	2	4	2	2	2	3	4	1	5	5	4	5	4	4	4	5
22237	2	2	22	1	7	1	0	0	0	1	0	1	0	1	1	0	0	1	0	1	0	0	0	0	0	1	1	0	0	1	1	2	1	1	2	2	2	2	4	4	4	4	4	4	4	4	2	4	4
22238	2	2	32	1	7	1	0	1	0	1	0	1	0	1	0	1	0	1	0	1	0	1	1	0	0	1	1	0	0	2	2	2	2	2	3	3	2	2	4	3	4	4	5	5	4	4	3	4	4
22239	2	1	20	1	5	1	1	0	1	1	0	1	0	1	1	0	1	1	0	1	0	0	0	1	1	1	1	0	0	3	4	2	1	3	5	4	1	2	4	3	4	2	3	5	4	4	3	4	2
22240	2	1	25	1	6	1	1	0	1	0	0	1	0	1	1	0	1	0	0	1	0	0	0	1	1	0	0	0	0	4	3	4	3	4	4	3	3	4	4	3	3	3	4	4	4	3	3	4	3
22241	2	1	37	2	5	1	1	0	1	0	0	1	0	1	1	0	1	0	0	1	0	0	0	1	1	0	0	0	0	4	5	5	5	4	4	3	2	4	3	3	3	4	4	4	4	3	4	4	4
22242	2	2	39	2	7	1	0	1	0	1	0	1	0	1	0	1	0	1	0	1	0	1	1	0	0	1	1	0	0	2	1	1	1	3	2	1	1	2	3	3	3	4	4	4	4	4	3	3	3
22243	2	2	40	2	7	1	0	0	0	1	0	1	0	1	0	0	0	1	0	1	0	0	0	0	0	1	1	0	0	4	5	4	5	4	4	4	5	4	2	2	4	4	3	5	4	3	2	4	4
22244	2	1	38	2	5	1	1	0	1	0	0	1	0	1	1	0	1	0	0	1	0	0	0	1	1	0	0	0	0	4	4	5	5	4	4	4	5	4	4	3	4	4	4	4	4	4	5	3	4
22245	2	1	36	2	7	1	0	0	1	0	0	1	0	1	0	0	1	0	0	1	0	0	0	1	1	0	0	0	0	1	1	1	1	2	2	3	1	1	3	2	2	3	3	3	3	3	1	2	4
22246	2	1	42	2	7	1	1	0	1	1	0	0	0	1	1	0	1	1	0	0	0	0	0	1	1	1	1	0	0	3	4	3	5	4	5	4	4	4	3	4	4	4	4	4	3	4	4	3	3
22271	2	1	25	1	6	1	1	0	0	0	0	1	0	1	0	0	1	0	0	1	0	0	0	0	1	0	0	0	0	3	4	4	4	5	4	4	5	3	4	4	3	4	3	4	3	4	4	4	3
22272	2	1	24	1	7	1	1	0	0	0	0	1	0	1	1	0	0	1	0	1	0	0	0	0	0	0	1	0	0	4	4	4	4	4	3	3	4	5	5	4	4	3	5	4	4	3	4	4	3
22273	2	1	34	1	7	1	0	0	0	1	0	1	0	1	1	0	1	1	0	1	0	0	0	0	1	1	1	0	0	3	4	3	5	4	3	4	4	4	3	4	3	4	4	3	5	4	4	4	5
22274	2	2	29	1	7	1	0	0	0	1	0	1	0	1	0	0	0	1	0	1	0	0	0	0	0	1	1	0	0	3	4	4	4	5	3	3	4	4	5	4	4	5	4	3	4	3	4	3	5
22275	2	2	29	1	7	1	0	1	0	1	0	1	0	1	0	1	0	1	0	1	0	1	1	0	0	1	1	0	0	4	3	4	4	3	4	3	4	5	3	5	4	3	3	4	4	4	3	4	4
22276	2	2	30	1	7	1	0	1	0	1	0	1	0	1	1	1	0	1	0	1	0	1	1	0	0	1	1	0	0	4	4	5	4	3	3	3	4	3	3	4	3	4	4	3	4	5	3	5	4
22277	2	2	27	1	6	1	0	1	0	1	0	0	0	1	0	1	0	1	0	1	0	1	1	0	0	1	1	0	0	3	4	3	4	4	4	4	5	3	4	5	3	4	5	4	3	4	5	4	4
22278	2	1	37	2	7	1	0	0	1	0	0	1	0	1	0	0	1	0	0	1	0	0	0	1	1	0	0	0	0	4	3	5	4	4	3	3	4	4	4	3	4	4	5	5	4	5	5	5	4
22279	2	1	40	2	5	1	0	0	0	1	0	0	0	1	0	0	0	1	0	0	0	0	0	0	0	1	1	0	0	4	4	4	5	3	4	5	5	3	5	4	5	3	4	4	4	3	4	3	4
22280	2	2	50	2	5	1	0	0	0	1	0	0	0	1	0	0	0	1	0	1	0	0	0	0	0	1	1	0	0	4	3	4	4	4	4	5	3	4	4	5	4	3	4	3	4	4	5	3	3
22281	2	2	42	2	6	1	0	0	0	1	0	0	0	1	0	0	0	1	0	1	0	0	0	0	0	1	1	0	0	4	4	3	3	5	4	4	3	5	4	4	3	5	2	4	3	3	2	5	2
22282	2	2	39	2	5	1	1	0	0	1	0	1	0	1	1	0	0	1	0	1	0	0	0	0	0	1	1	0	0	4	4	5	3	4	4	3	4	4	3	5	4	4	4	3	4	2	5	4	4
22283	2	2	30	1	6	1	0	1	0	1	0	0	0	1	0	1	0	1	0	1	0	1	1	0	0	1	1	0	0	4	4	4	3	3	4	3	5	5	3	4	3	2	4	3	4	4	3	4	5
22284	2	1	47	2	6	1	0	0	1	0	0	0	0	0	0	0	1	0	0	1	0	0	0	1	1	0	0	0	0	4	4	4	3	4	3	3	4	4	4	4	3	3	4	3	2	3	3	4	3
22285	2	2	36	2	5	1	0	0	0	1	0	1	0	1	0	0	0	1	0	1	0	0	0	0	0	1	1	0	0	4	5	4	4	3	4	4	5	5	3	3	5	5	5	5	5	5	3	5	5
22286	2	2	40	2	5	1	0	0	0	1	0	0	0	1	0	0	0	1	0	0	0	0	0	0	0	1	1	0	0	1	3	4	2	1	4	1	5	4	5	4	5	2	5	4	4	1	5	4	5
22287	2	1	18	1	5	0	0	1	1	0	0	0	0	0	1	1	0	0	0	1	0	1	1	1	0	0	0	0	0	5	5	5	4	3	5	3	4	5	4	3	4	4	4	4	3	3	3	4	3
22288	2	2	50	2	5	1	0	0	0	1	1	0	0	1	0	0	0	1	1	0	0	0	0	0	0	1	1	1	1	5	5	5	5	5	5	4	5	5	4	1	5	2	3	5	3	5	1	2	3
22289	2	1	26	1	5	1	1	0	0	1	0	1	0	1	0	0	0	1	0	1	0	0	0	0	0	1	1	0	0	5	4	5	5	4	4	3	4	5	2	2	3	3	3	4	4	3	2	3	2
22290	2	1	38	2	7	1	0	1	1	1	0	0	0	1	0	1	1	1	0	0	0	1	1	1	1	1	1	0	0	5	4	5	5	4	4	4	3	5	4	4	5	5	5	3	5	4	4	4	5
22295	2	1	26	1	6	1	1	1	0	0	0	1	0	1	1	1	0	0	0	1	0	1	1	0	0	0	0	0	0	5	4	5	4	3	5	4	4	5	5	5	5	5	5	4	5	5	5	4	4
22296	2	2	40	2	5	0	0	1	0	1	0	0	0	0	0	1	0	1	0	0	0	1	1	0	0	1	1	0	0	5	4	4	5	5	4	5	5	5	4	4	5	4	3	5	4	4	5	5	4
22297	2	2	45	2	5	1	1	0	0	1	0	0	0	1	0	0	0	1	0	0	0	0	0	0	0	1	1	0	0	4	4	4	5	5	4	5	4	5	4	5	5	4	4	5	4	5	5	4	4
22298	2	2	40	2	5	1	0	0	0	1	0	0	0	1	0	0	0	1	0	0	0	0	0	0	0	1	1	0	0	4	4	5	5	4	4	5	5	4	4	5	5	5	5	4	4	4	5	4	4
22300	2	2	34	1	5	1	0	0	0	1	0	0	0	1	0	0	0	1	0	0	0	0	0	0	0	1	1	0	0	5	5	4	5	4	5	4	4	4	4	4	5	4	5	4	5	4	5	5	4
22500	2	1	25	1	5	1	1	0	0	1	0	1	0	1	1	1	0	1	0	1	0	0	1	0	0	1	1	0	0	4	2	4	2	3	5	4	3	4	2	2	4	1	4	4	4	1	1	3	2
22501	2	2	31	1	5	1	1	0	0	1	0	1	0	1	0	0	0	1	0	1	0	0	0	0	0	1	1	0	0	4	4	4	4	4	4	2	4	4	5	5	5	5	5	5	4	4	4	4	5
22502	2	1	35	1	5	1	1	0	1	0	0	0	0	1	0	0	1	1	0	0	0	0	0	1	1	0	1	0	0	4	4	3	5	4	4	3	4	4	3	4	5	4	2	4	5	4	4	3	5
22503	2	2	29	1	5	1	1	0	0	1	1	1	0	0	1	0	0	1	1	1	0	0	0	0	0	1	1	1	1	5	5	4	4	4	5	5	4	4	4	4	4	4	5	5	5	5	4	4	4
22504	2	1	36	2	7	1	1	0	1	1	1	1	0	1	1	0	1	1	0	0	0	0	0	1	1	1	1	1	0	4	5	4	2	5	4	4	4	3	4	4	4	5	5	5	3	4	5	4	4
22505	2	1	23	1	5	1	0	0	1	1	0	0	0	0	0	0	1	1	0	0	0	0	0	1	1	1	1	0	0	1	1	1	2	4	4	3	2	1	5	4	4	4	4	4	4	5	4	4	4
22506	2	2	36	2	6	1	0	1	1	1	0	0	0	1	0	1	1	0	0	0	0	1	1	1	1	1	0	0	0	5	4	4	5	4	3	5	4	5	5	4	5	4	5	5	5	5	5	4	5
22507	2	2	29	1	5	1	0	1	0	1	0	0	0	1	0	1	0	1	0	0	0	1	1	0	0	1	1	0	0	4	5	4	5	5	5	4	5	5	5	4	5	5	4	4	4	4	5	4	4
22508	2	1	37	2	5	1	0	0	0	1	1	1	0	1	0	0	0	1	1	1	0	0	0	0	0	1	1	1	1	5	5	3	4	4	4	4	4	3	4	5	4	4	5	4	5	5	5	4	5
22509	2	1	38	2	6	0	0	0	1	1	0	1	0	0	0	0	1	1	0	0	0	0	0	1	1	1	1	0	0	5	5	4	4	5	4	4	5	4	4	5	5	4	5	5	4	4	4	4	4
22510	2	2	24	1	5	1	0	1	0	1	0	0	0	1	0	1	0	1	0	0	0	1	1	0	0	1	1	0	0	2	2	1	1	4	4	4	4	2	5	4	4	4	4	5	4	5	4	4	5
22511	2	1	20	1	6	0	0	0	1	0	0	1	0	1	1	0	1	0	0	0	0	0	0	1	1	0	0	0	0	3	5	5	5	2	3	4	4	4	5	4	5	5	5	4	5	5	4	5	4
22512	2	1	27	1	7	1	0	0	1	1	0	0	0	1	0	0	1	0	0	1	0	0	0	1	1	1	0	0	0	4	4	5	4	4	5	4	4	4	5	5	4	5	4	4	5	4	4	5	4
22513	2	1	26	1	5	0	1	0	0	1	0	1	0	0	0	0	0	1	0	0	0	0	0	0	0	1	1	0	0	2	2	2	1	3	2	2	3	1	3	3	4	4	4	4	4	3	3	3	4
22514	2	1	43	2	5	0	1	0	1	1	0	0	0	0	1	0	1	1	0	0	0	0	0	1	1	1	1	0	0	4	5	4	4	4	2	5	3	4	5	5	4	5	4	5	4	4	5	5	5
22515	2	2	45	2	5	0	1	0	0	1	0	1	0	0	0	0	0	1	0	0	0	0	0	0	0	1	1	0	0	5	4	4	4	5	5	5	4	4	3	5	4	4	5	4	4	3	3	4	4
22516	2	1	36	2	5	1	0	0	1	1	0	0	0	0	0	0	1	1	0	1	0	0	0	1	1	1	1	0	0	4	4	4	5	4	4	5	3	4	4	4	3	5	5	5	4	4	4	4	4
22517	2	1	38	2	5	0	0	1	1	1	0	0	0	1	1	1	1	1	0	0	0	1	1	1	1	1	1	0	0	3	4	5	4	4	3	2	4	4	4	4	3	3	4	5	4	3	4	4	4
22518	2	2	38	2	5	1	1	1	1	1	0	1	0	1	1	1	1	1	0	1	0	1	1	1	1	1	1	0	0	4	4	5	5	4	4	3	4	4	5	4	5	5	4	4	5	4	5	4	4
22519	2	1	34	1	7	1	0	1	0	1	0	0	0	1	0	1	0	1	0	0	0	1	1	0	0	1	1	0	0	3	4	5	4	5	4	4	4	5	4	4	4	3	3	4	3	5	4	3	3
22520	2	1	36	2	6	1	0	1	0	0	0	0	0	1	0	1	0	0	0	0	0	1	1	0	0	0	0	0	0	4	5	5	5	4	5	4	5	5	3	4	4	4	4	5	5	4	4	4	4
22521	2	1	34	1	7	1	0	1	0	1	0	1	0	1	0	1	0	1	0	0	0	1	1	0	0	1	1	0	0	4	4	5	5	4	4	2	4	5	4	4	5	5	4	4	5	3	5	5	4
22522	2	2	45	2	5	1	0	0	0	1	0	0	0	0	0	0	0	1	0	0	0	0	0	0	0	1	1	0	0	3	3	4	5	2	4	3	4	4	4	5	4	4	5	5	5	4	4	5	4
22523	2	2	34	1	5	0	0	1	1	1	0	0	0	1	0	1	1	1	0	0	0	1	1	1	1	1	1	0	0	5	5	5	5	4	5	5	4	5	5	4	5	4	4	3	5	4	5	4	4
22525	2	1	53	2	5	1	1	0	0	1	0	0	0	1	1	0	0	1	0	0	0	0	0	0	0	1	1	0	0	5	5	5	5	5	5	5	5	5	3	3	5	5	4	4	4	4	2	4	4
22526	2	2	41	2	5	1	0	1	0	1	0	1	0	1	0	0	0	1	0	1	0	1	0	0	0	1	1	0	0	5	5	5	4	5	4	5	4	4	4	5	5	4	4	5	4	4	3	4	4
22528	2	1	46	2	7	1	0	0	1	0	0	0	0	1	0	0	1	0	0	0	0	0	0	1	1	0	0	0	0	5	5	4	4	5	5	4	4	4	4	4	4	4	4	5	5	4	4	4	5
22529	2	2	31	1	6	0	0	1	0	1	0	0	0	1	0	1	0	0	0	0	0	1	1	0	0	1	0	0	0	4	4	5	4	4	5	5	4	4	3	3	5	3	3	3	4	5	4	5	5
22530	2	1	28	1	6	1	0	1	0	0	0	0	0	1	1	1	1	0	0	0	0	1	1	0	1	0	0	0	0	5	4	5	4	5	5	4	5	4	5	5	4	4	4	4	5	4	5	5	4
22531	2	1	49	2	7	1	0	0	0	1	0	0	0	1	0	0	0	1	0	0	0	0	0	0	0	1	1	0	0	5	4	5	5	5	4	5	5	4	4	5	4	4	5	5	5	4	5	4	4
22532	2	1	40	2	5	0	1	0	1	0	0	0	0	0	0	0	1	0	0	0	0	0	0	1	1	0	0	0	0	4	5	4	5	5	4	5	4	4	5	4	4	4	4	4	4	5	4	4	4
22533	2	1	32	1	6	1	0	1	0	0	0	0	0	1	0	1	0	0	0	0	0	1	1	0	0	0	0	0	0	4	5	4	5	5	4	4	5	5	4	5	4	5	4	4	4	4	4	4	4
22534	2	2	37	2	5	1	0	0	0	1	0	0	0	1	0	0	0	1	1	0	0	0	0	0	0	1	1	0	1	4	5	4	5	5	4	5	4	5	5	5	4	4	5	4	5	4	5	4	4
22535	2	2	49	2	6	1	0	1	0	1	0	0	0	1	0	1	0	1	0	0	0	1	1	0	0	1	1	0	0	5	5	4	4	5	4	4	5	5	4	5	4	4	4	4	5	4	4	5	4
22536	2	1	33	1	6	1	0	1	0	0	0	0	0	1	0	1	0	0	0	0	0	1	1	0	0	0	0	0	0	5	5	5	4	4	5	5	4	5	4	4	5	4	4	4	4	5	4	5	4
22537	2	2	38	2	5	1	0	1	0	1	0	0	0	1	0	1	0	1	0	0	0	1	1	0	0	1	1	0	0	1	1	1	1	2	2	1	1	1	3	4	3	3	4	3	4	3	4	3	3
22538	2	2	32	1	6	1	0	1	0	1	0	0	0	1	0	1	0	1	0	0	0	1	1	0	0	1	1	0	0	1	2	1	1	1	1	2	1	1	4	4	4	3	4	4	3	4	4	4	3
22540	2	2	44	2	7	1	0	0	0	1	0	0	0	1	0	0	0	1	0	0	0	0	0	0	0	1	1	0	0	3	1	1	1	1	3	1	2	1	3	3	3	3	3	4	4	3	3	3	3
22541	2	1	30	1	5	1	0	1	0	1	0	1	0	1	0	1	0	1	0	0	0	1	1	0	0	1	1	0	0	1	1	1	4	4	1	1	1	1	4	1	1	4	1	5	3	2	1	2	4
22542	2	2	35	1	5	1	1	1	0	1	0	1	0	1	1	0	0	1	0	1	0	1	0	0	0	1	1	0	0	4	3	4	5	3	3	4	3	5	3	3	4	4	4	4	4	4	3	4	3
22543	2	1	36	2	7	1	1	1	0	1	0	0	0	1	1	1	0	1	0	0	0	1	1	0	0	1	1	0	0	5	5	4	4	4	4	4	4	4	3	2	3	3	4	4	3	3	3	3	3
22544	2	1	25	1	6	1	1	0	1	0	0	1	0	1	1	0	1	0	0	1	0	0	0	1	1	0	0	0	0	4	3	4	3	3	4	4	3	4	3	4	3	3	3	4	4	4	3	3	4
22545	2	1	45	2	5	1	0	0	0	1	0	1	0	1	0	0	0	1	0	1	0	0	0	0	0	1	1	0	0	2	1	1	2	2	2	2	2	1	3	3	4	4	4	4	3	4	3	3	4
22546	2	2	42	2	5	1	0	0	0	1	0	0	0	1	0	0	0	1	0	0	0	0	0	0	0	1	1	0	0	2	2	1	1	2	2	2	1	1	3	3	3	4	4	4	3	4	3	4	4
22547	2	2	38	2	6	1	0	0	0	1	0	1	0	1	0	0	0	1	0	1	0	0	0	0	0	1	1	0	0	1	3	2	1	4	2	2	4	4	4	3	4	4	4	4	4	3	2	3	4
22548	2	2	52	2	6	1	0	1	0	1	0	1	0	1	0	1	0	1	0	1	0	1	1	0	0	1	1	0	0	2	1	1	1	2	2	1	2	1	3	3	3	4	4	4	4	4	3	4	4
22549	2	1	25	1	5	1	0	0	1	0	0	1	0	1	1	0	1	1	0	1	0	0	0	1	1	0	1	0	0	2	2	2	1	2	1	1	2	1	3	3	3	4	4	4	4	4	3	3	4
22550	2	1	35	1	5	1	0	0	1	1	0	0	0	1	0	0	1	1	0	1	0	0	0	1	1	1	1	0	0	1	2	2	2	1	1	2	2	2	3	3	3	4	3	4	4	4	3	3	4
22551	2	1	31	1	5	1	0	0	0	1	0	1	0	1	0	0	0	1	0	0	0	0	0	0	0	1	1	0	0	1	1	1	1	2	3	1	2	1	1	1	4	5	5	3	5	1	1	4	4
22552	2	1	36	2	5	1	0	0	1	0	0	1	0	1	0	0	1	0	0	1	0	0	0	1	1	0	0	0	0	2	1	1	1	2	2	1	2	1	3	5	5	5	3	3	3	5	4	4	5
22553	2	2	30	1	7	1	0	0	0	1	0	1	0	1	0	0	0	1	0	1	0	0	0	0	0	1	1	0	0	4	5	5	4	3	5	4	3	4	4	4	4	4	5	5	3	3	4	4	4
32001	3	2	18	1	7	1	1	0	0	1	1	0	0	1	0	0	0	1	0	0	0	0	0	0	0	1	1	1	0	4	3	4	5	4	4	3	3	4	1	1	2	5	5	2	2	2	1	1	5
32002	3	1	25	1	5	1	0	0	0	1	0	0	0	1	0	0	0	1	0	0	0	0	0	0	0	1	1	0	0	3	3	3	5	4	3	3	4	4	3	3	3	4	4	4	3	4	3	3	4
32003	3	2	25	1	4	1	1	0	0	1	0	1	0	1	1	0	0	1	0	1	0	0	0	0	0	1	1	0	0	4	4	5	5	4	4	3	4	3	4	3	4	4	4	4	4	4	3	4	4
32004	3	1	52	2	5	1	0	0	0	1	1	0	0	1	0	0	0	1	1	0	0	0	0	0	0	1	1	1	1	5	5	4	5	3	4	3	4	5	2	2	2	2	3	3	2	2	3	2	3
32005	3	1	23	1	5	1	1	0	0	0	0	1	0	1	1	0	1	0	0	1	0	0	0	0	1	0	0	0	0	4	5	4	5	4	3	3	4	5	2	2	3	3	3	4	4	2	3	3	2
32006	3	1	24	1	4	0	0	0	0	1	0	0	0	1	0	0	0	1	0	0	0	0	0	0	0	1	1	0	0	2	3	3	2	4	3	2	3	2	4	4	3	4	5	5	4	5	5	4	4
32007	3	1	28	1	5	0	1	0	0	1	0	1	0	1	0	0	0	1	0	0	0	0	0	0	0	1	1	0	0	1	2	3	1	3	4	4	2	1	2	4	5	3	3	5	4	5	2	4	5
32008	3	2	21	1	5	1	1	0	0	1	0	0	0	1	1	0	0	0	0	1	0	0	0	0	0	1	0	0	0	5	4	3	5	5	4	3	3	5	2	2	3	4	4	3	4	2	3	3	5
32009	3	1	53	2	4	1	0	0	0	1	0	0	0	1	0	0	0	1	0	0	0	0	0	0	0	1	1	0	0	4	4	4	4	3	3	5	3	4	2	2	2	2	3	4	3	3	2	2	4
32010	3	1	19	1	4	0	0	0	0	0	0	0	1	0	0	0	1	0	0	1	0	0	0	0	1	0	0	0	0	2	2	3	1	2	4	4	1	2	3	1	3	4	4	3	2	3	2	3	4
32011	3	1	28	1	5	1	1	0	0	0	0	1	0	1	1	0	1	0	0	1	0	0	0	0	1	0	0	0	0	1	1	2	1	2	1	2	1	1	3	4	3	3	4	5	4	3	3	4	3
32012	3	1	29	1	5	1	0	1	1	1	1	0	0	0	0	1	1	1	1	0	0	1	1	1	1	1	1	1	1	5	5	5	5	4	4	4	4	5	4	4	3	3	3	2	3	3	5	4	3
32013	3	1	25	1	4	1	0	0	1	0	0	0	0	1	0	0	1	0	0	0	0	0	0	1	1	0	0	0	0	5	5	5	5	4	5	2	5	5	4	5	4	4	4	4	4	5	5	4	4
32014	3	2	35	1	4	1	1	1	0	1	1	1	0	1	1	1	0	1	1	1	0	1	1	0	0	1	1	1	1	5	5	5	5	4	5	5	5	5	2	3	3	3	3	4	3	3	3	3	3
32016	3	2	39	2	4	1	0	1	0	1	0	0	0	1	0	1	0	1	0	0	0	1	1	0	0	1	1	0	0	5	5	4	5	4	3	4	4	5	1	1	4	3	4	4	4	3	1	4	4
32017	3	2	34	1	4	0	1	1	0	0	0	0	0	0	0	0	0	1	1	0	0	1	0	0	0	0	1	0	1	1	1	1	1	2	2	2	1	1	4	5	4	3	4	3	3	4	3	3	3
32018	3	1	18	1	4	1	1	0	1	0	0	1	0	1	1	0	1	0	0	1	0	0	0	1	1	0	0	0	0	4	4	4	5	3	4	3	3	5	2	2	4	4	3	4	2	3	2	4	4
32019	3	2	26	1	4	1	0	1	0	1	0	1	0	1	0	0	0	1	0	0	0	1	0	0	0	1	1	0	0	5	4	4	4	5	5	5	5	5	2	3	4	4	5	4	4	5	3	4	5
32020	3	1	20	1	6	0	0	0	1	0	0	0	0	1	1	0	1	0	0	0	0	0	0	1	1	0	0	0	0	5	5	5	5	5	5	5	5	5	1	1	1	1	1	5	3	1	1	5	3
32021	3	2	47	2	5	1	0	1	0	1	0	1	0	0	0	1	0	1	0	0	0	1	1	0	0	1	1	0	0	4	4	5	5	3	4	5	4	5	4	4	5	4	4	5	5	5	5	5	5
32022	3	2	30	1	4	1	0	1	0	1	0	0	0	1	0	1	0	1	0	0	0	1	1	0	0	1	1	0	0	5	5	5	5	5	4	5	5	5	5	5	5	5	5	5	5	5	5	5	5
32023	3	2	53	2	4	0	0	1	0	1	0	0	0	0	0	1	0	1	1	0	0	1	1	0	0	1	1	0	1	5	5	5	5	5	5	5	5	5	5	5	5	5	5	5	5	5	4	4	4
32024	3	2	27	1	4	0	0	1	0	1	0	0	0	0	0	1	0	1	0	0	0	1	1	0	0	1	1	0	0	5	4	5	5	5	5	4	5	5	4	4	4	5	4	5	3	5	5	4	4
32025	3	1	54	2	4	1	0	0	1	0	1	1	0	0	0	0	1	0	0	0	0	0	0	1	1	0	0	1	0	4	4	4	4	3	4	4	4	4	4	3	3	3	4	3	4	4	4	4	4
32026	3	1	40	2	5	1	0	0	1	1	0	0	0	1	0	0	1	0	0	0	0	0	0	1	1	1	0	0	0	5	5	5	5	5	5	5	5	5	4	5	5	4	5	5	4	5	4	4	4
32027	3	1	22	1	4	1	0	0	1	1	0	1	0	1	0	0	0	1	1	0	0	0	0	1	0	1	1	0	1	4	4	4	5	4	5	5	5	5	5	5	5	5	5	5	5	5	5	4	5
32028	3	2	50	2	5	1	0	1	0	1	0	0	0	1	0	1	0	1	0	0	0	1	1	0	0	1	1	0	0	5	5	5	5	4	5	5	4	5	5	4	5	5	5	4	4	5	4	4	5
32029	3	2	38	2	4	0	0	1	0	1	0	1	0	0	0	1	0	1	0	1	0	1	1	0	0	1	1	0	0	5	4	5	4	4	4	4	4	5	4	5	4	5	4	5	5	5	5	4	5
32030	3	2	47	2	6	0	1	1	1	1	0	1	0	1	1	0	1	0	0	1	0	1	0	1	1	1	0	0	0	5	5	5	5	5	5	5	5	5	4	4	5	5	5	5	4	5	5	5	5
32031	3	2	48	2	4	1	1	1	0	0	0	1	0	1	0	1	0	0	0	0	0	1	1	0	0	0	0	0	0	4	4	4	4	4	4	4	4	4	5	5	4	4	5	4	5	4	5	5	4
32032	3	2	53	2	4	0	0	0	1	1	0	0	0	0	0	0	1	1	0	0	0	0	0	1	1	1	1	0	0	5	5	5	5	4	4	5	5	5	5	4	5	5	4	4	4	4	5	5	5
32033	3	2	35	1	4	0	0	1	0	1	0	0	0	0	0	1	0	1	0	0	0	1	1	0	0	1	1	0	0	5	5	5	5	5	5	5	5	5	5	5	4	5	5	5	4	4	5	4	5
32034	3	1	20	1	4	1	0	0	1	1	0	0	0	0	0	0	1	0	0	0	0	0	0	1	1	1	0	0	0	5	5	5	5	5	5	5	4	5	5	5	5	5	5	5	5	5	5	5	5
32035	3	1	25	1	7	1	1	1	0	0	0	1	0	1	1	1	0	0	0	0	0	1	1	0	0	0	0	0	0	5	5	5	5	5	5	5	5	5	5	5	4	5	5	5	4	5	5	4	5
32036	3	2	28	1	4	1	1	1	0	1	0	1	0	1	1	0	0	1	0	1	0	1	0	0	0	1	1	0	0	5	5	5	5	5	5	5	5	5	4	5	4	5	5	5	4	5	5	4	5
32037	3	2	35	1	4	1	0	1	0	1	0	1	0	1	1	1	1	1	0	1	0	1	1	0	1	1	1	0	0	4	5	5	4	4	5	5	5	5	4	4	5	5	4	4	4	4	4	4	5
32038	3	2	25	1	5	1	1	1	0	1	1	1	0	1	1	1	0	1	1	1	0	1	1	0	0	1	1	1	1	5	4	5	4	4	4	4	4	5	3	3	3	5	5	4	3	4	3	4	5
32039	3	2	55	2	4	1	0	1	0	1	1	0	0	1	0	0	0	1	1	0	0	1	0	0	0	1	1	1	1	5	5	5	4	4	5	5	5	5	5	5	5	4	4	5	4	4	4	5	4
32040	3	2	42	2	4	1	0	1	0	1	0	0	0	0	0	1	0	1	0	0	0	1	1	0	0	1	1	0	0	5	5	5	5	5	5	5	5	5	5	5	5	4	5	5	3	4	3	5	4
32041	3	1	35	1	5	1	0	0	0	1	0	0	0	1	0	0	0	1	0	1	0	0	0	0	0	1	1	0	0	5	5	5	5	4	5	4	5	5	2	1	3	3	2	4	3	2	2	3	3
32042	3	1	36	2	6	1	0	1	0	1	0	1	0	0	0	1	0	1	0	1	0	1	1	0	0	1	1	0	0	5	4	4	5	4	4	3	5	5	2	3	4	4	3	4	4	3	1	3	4
32043	3	2	47	2	4	1	1	0	0	0	1	1	0	1	1	0	0	1	0	0	0	0	0	0	0	0	1	1	0	5	3	4	4	4	5	5	5	5	4	4	4	4	4	4	3	4	3	3	4
32044	3	2	42	2	4	0	1	1	0	0	0	0	0	0	0	1	0	1	0	1	0	1	1	0	0	0	1	0	0	4	4	5	5	4	4	4	4	4	1	1	3	3	3	2	2	2	3	4	4
32045	3	2	50	2	4	1	0	0	0	1	0	0	0	1	0	0	0	0	0	0	0	0	0	0	0	1	0	0	0	5	4	5	5	4	4	4	3	4	1	1	4	3	4	4	3	2	1	2	4
32046	3	2	35	1	4	1	1	0	0	1	0	1	0	1	1	0	0	1	0	1	0	0	0	0	0	1	1	0	0	5	5	5	5	4	5	5	4	5	2	2	2	3	3	4	2	3	1	4	4
32047	3	1	24	1	4	0	0	0	0	1	1	1	0	1	0	0	0	1	1	0	0	0	0	0	0	1	1	1	1	3	4	5	3	5	4	4	4	3	3	3	4	3	4	4	3	4	3	3	3
32048	3	1	45	2	4	1	0	0	0	1	0	0	0	1	0	0	0	1	0	0	0	0	0	0	0	1	1	0	0	4	4	5	4	4	4	4	4	4	4	4	3	4	3	4	3	4	4	4	4
32049	3	1	19	1	5	0	0	0	0	0	0	0	1	1	0	0	0	1	0	0	0	0	0	0	0	0	1	0	0	5	4	5	5	4	3	3	4	5	3	3	4	4	4	4	3	4	3	4	4
32050	3	1	45	2	4	1	0	0	1	1	1	0	0	1	1	0	0	1	0	0	0	0	0	1	0	1	1	1	0	5	5	5	5	4	5	5	5	5	4	4	5	4	4	4	5	4	4	4	4
32051	3	1	24	1	4	0	0	0	1	1	0	0	0	1	0	0	0	1	0	0	0	0	0	1	0	1	1	0	0	5	5	4	5	4	4	4	5	5	3	3	4	3	4	4	4	4	3	4	4
32052	3	2	41	2	4	0	0	1	0	1	0	0	0	0	0	1	0	1	0	0	0	1	1	0	0	1	1	0	0	5	4	5	4	4	4	4	4	5	3	1	4	3	3	4	3	3	1	4	3
32053	3	2	20	1	4	1	1	1	0	1	1	1	0	0	1	1	1	0	0	0	0	1	1	0	1	1	0	1	0	4	3	2	5	3	3	2	3	3	3	1	4	3	4	4	3	4	2	4	3
32054	3	2	40	2	5	1	0	1	0	1	0	0	0	1	0	1	0	1	0	0	0	1	1	0	0	1	1	0	0	5	5	5	5	3	5	5	5	4	3	3	3	3	4	4	3	3	3	4	4
32055	3	2	48	2	5	1	0	1	1	1	1	0	0	1	0	1	0	1	1	0	0	1	1	1	0	1	1	1	1	4	3	5	5	4	4	3	4	4	3	1	3	3	4	4	3	3	2	4	3
32056	3	1	50	2	5	1	0	0	1	0	0	0	0	1	1	0	1	0	0	0	0	0	0	1	1	0	0	0	0	4	4	5	5	3	4	3	4	4	2	1	3	3	4	3	3	3	2	4	3
32057	3	1	32	1	4	1	0	0	1	0	0	1	0	1	1	0	1	0	0	0	0	0	0	1	1	0	0	0	0	3	4	5	5	3	2	4	4	5	2	4	4	3	3	3	2	4	2	4	4
32058	3	2	29	1	5	1	1	1	0	0	0	1	0	1	0	1	0	0	0	0	0	1	1	0	0	0	0	0	0	4	4	5	4	4	4	3	4	4	2	1	4	3	3	3	3	3	2	4	3
32059	3	1	26	1	5	0	1	0	1	0	0	1	0	0	1	0	1	0	0	0	0	0	0	1	1	0	0	0	0	4	4	4	4	3	4	4	4	4	3	3	4	3	4	4	3	3	3	4	3
32060	3	1	28	1	5	1	0	0	1	0	0	1	0	0	1	0	1	0	0	1	0	0	0	1	1	0	0	0	0	5	5	5	5	5	4	5	5	5	1	1	3	1	1	1	4	4	1	1	4
32061	3	2	45	2	4	1	1	1	0	1	0	0	0	1	1	1	0	1	0	1	0	1	1	0	0	1	1	0	0	5	4	4	4	4	4	4	4	5	4	4	4	4	4	4	4	4	4	5	4
32062	3	2	45	2	5	0	0	1	0	1	0	1	0	1	0	1	0	1	0	0	0	1	1	0	0	1	1	0	0	5	4	5	5	4	5	5	5	5	4	1	4	4	4	4	1	1	1	4	4
32063	3	2	55	2	5	0	0	1	0	1	0	0	0	1	0	1	0	1	0	0	0	1	1	0	0	1	1	0	0	5	5	5	5	5	5	5	5	5	3	4	3	4	4	4	4	4	2	4	3
32064	3	2	54	2	4	1	0	1	0	1	0	0	0	0	0	1	0	1	0	1	0	1	1	0	0	1	1	0	0	5	5	5	5	5	5	5	4	5	4	4	4	5	4	4	4	5	4	4	4
32065	3	2	18	1	4	1	0	0	0	1	0	1	0	1	0	0	0	1	0	1	0	0	0	0	0	1	1	0	0	5	5	5	5	4	5	5	4	5	5	5	5	5	4	5	4	5	5	4	4
32066	3	2	36	2	5	0	0	1	0	1	0	0	0	0	0	1	0	1	0	0	0	1	1	0	0	1	1	0	0	5	5	5	4	5	5	5	5	4	4	3	3	4	4	4	3	3	4	4	4
32067	3	2	35	1	6	1	0	0	0	1	0	0	0	1	0	0	0	1	0	0	0	0	0	0	0	1	1	0	0	5	5	4	4	5	4	4	4	5	5	4	4	4	5	5	5	4	4	5	5
32068	3	1	18	1	4	0	1	0	1	1	0	1	0	0	1	0	1	1	0	0	0	0	0	1	1	1	1	0	0	5	4	5	5	5	5	4	4	5	5	5	5	5	4	4	5	5	4	5	5
32069	3	2	32	1	4	1	1	1	0	0	1	1	0	1	0	0	0	0	1	1	0	1	0	0	0	0	0	1	1	5	5	4	5	4	5	5	4	5	4	5	4	5	5	4	5	5	4	5	5
32070	3	2	33	1	4	1	0	0	1	1	1	1	0	1	0	0	1	1	1	1	0	0	0	1	1	1	1	1	1	5	5	4	5	4	3	3	5	5	4	4	4	5	5	5	5	4	4	5	5
32071	3	2	33	1	5	1	0	0	0	1	0	1	0	1	0	0	0	1	0	1	0	0	0	0	0	1	1	0	0	5	5	5	5	4	4	5	4	5	4	5	4	5	5	5	4	5	4	5	5
32072	3	2	34	1	4	1	0	1	0	1	0	0	0	1	0	1	0	1	0	0	0	1	1	0	0	1	1	0	0	5	4	5	5	4	4	5	4	5	5	4	5	4	5	4	5	4	4	5	5
32073	3	1	28	1	4	1	0	0	0	1	0	0	0	1	0	0	0	1	0	0	0	0	0	0	0	1	1	0	0	5	5	5	5	4	3	3	4	5	4	4	4	4	4	5	4	5	4	4	4
32074	3	2	18	1	6	1	0	1	0	1	0	0	0	0	1	1	0	1	0	0	0	1	1	0	0	1	1	0	0	5	5	4	4	4	5	4	5	5	4	5	4	5	5	5	4	4	4	4	4
32076	3	1	38	2	7	1	0	0	1	1	0	0	0	1	0	0	1	1	0	0	0	0	0	1	1	1	1	0	0	5	5	4	5	4	5	4	5	4	4	4	5	5	5	5	5	5	5	4	5
32077	3	1	43	2	4	0	1	0	0	1	0	1	0	1	1	0	0	1	0	0	0	0	0	0	0	1	1	0	0	5	5	5	5	5	4	5	5	5	3	4	5	4	4	4	5	4	3	5	4
32078	3	2	33	1	4	1	0	0	0	1	0	1	0	1	0	0	0	1	0	0	0	0	0	0	0	1	1	0	0	5	5	4	5	5	4	4	5	5	5	4	5	4	5	5	4	4	4	5	4
32079	3	1	32	1	4	0	0	0	1	0	1	0	0	0	1	0	0	1	1	0	0	0	0	1	0	0	1	1	1	5	4	3	5	4	4	5	5	5	5	5	5	5	5	5	5	5	4	4	5
32080	3	2	23	1	4	1	0	0	0	1	0	1	0	1	0	0	0	1	0	0	0	0	0	0	0	1	1	0	0	5	5	5	5	4	4	4	5	5	4	4	4	5	5	5	4	5	5	4	5
32081	3	2	40	2	4	0	0	0	0	1	1	0	0	0	0	0	0	1	1	0	0	0	0	0	0	1	1	1	1	1	1	1	1	1	1	1	5	1	3	5	5	4	5	3	5	5	4	5	5
32082	3	1	52	2	5	0	0	0	1	1	0	0	0	0	0	0	0	0	1	0	0	0	0	1	0	1	0	0	1	3	4	3	3	4	4	4	3	4	4	3	4	4	4	3	3	4	3	3	3
32084	3	1	26	1	4	1	0	0	0	1	0	0	0	1	1	0	0	1	1	0	0	0	0	0	0	1	1	0	1	4	4	4	4	4	4	4	5	5	3	3	4	3	3	3	3	4	2	3	3
32085	3	2	23	1	4	0	0	0	0	1	0	0	0	0	0	0	0	1	0	0	0	0	0	0	0	1	1	0	0	4	4	4	5	4	4	4	5	4	3	3	3	4	3	3	4	4	3	3	4
32086	3	1	54	2	5	0	0	0	1	1	0	0	0	0	0	0	1	0	0	0	0	0	0	1	1	1	0	0	0	4	5	5	4	4	4	5	5	4	4	5	3	4	4	5	4	4	2	4	2
32087	3	1	51	2	4	1	0	0	0	1	0	0	0	1	0	0	0	1	0	0	0	0	0	0	0	1	1	0	0	2	5	5	3	5	5	4	4	5	4	4	3	3	3	3	4	3	4	4	3
32089	3	1	22	1	6	1	0	1	1	1	1	1	0	1	1	0	1	1	1	1	0	1	0	1	1	1	1	1	1	5	5	5	5	3	3	3	5	5	3	3	4	4	2	5	3	2	3	4	3
32090	3	1	40	2	4	0	0	0	0	1	0	0	0	0	0	0	0	1	0	0	0	0	0	0	0	1	1	0	0	4	4	2	4	4	3	4	4	5	4	4	4	3	3	3	4	3	3	4	3
32091	3	2	18	1	4	1	0	0	0	1	0	1	0	1	0	0	0	1	0	1	0	0	0	0	0	1	1	0	0	4	4	3	4	3	4	3	4	4	3	4	4	4	3	4	4	3	3	3	4
32092	3	1	53	2	4	1	0	0	1	1	0	0	0	1	0	0	1	1	0	0	0	0	0	1	1	1	1	0	0	5	5	4	4	4	4	5	4	4	3	4	5	3	4	2	3	5	4	3	4
32093	3	2	18	1	5	1	1	0	0	1	0	1	0	1	1	0	0	1	0	1	0	0	0	0	0	1	1	0	0	4	3	4	5	3	4	3	4	4	3	3	2	3	5	5	4	1	4	3	1
32094	3	1	20	1	5	1	1	0	1	0	0	1	0	1	1	0	1	0	0	1	0	0	0	1	1	0	0	0	0	4	4	5	5	4	4	3	5	5	3	4	2	4	3	4	3	3	3	3	4
32096	3	1	30	1	4	0	0	0	1	1	1	0	0	0	0	0	1	1	1	0	0	0	0	1	1	1	1	1	1	3	1	4	3	4	5	3	2	2	3	1	5	2	2	5	2	4	2	4	3
32097	3	2	20	1	5	1	0	1	0	0	0	1	0	1	0	1	0	1	0	1	0	1	1	0	0	0	1	0	0	5	5	5	5	3	4	5	4	5	2	3	4	4	4	4	2	3	2	4	4
32098	3	2	19	1	7	1	1	0	1	1	1	1	0	1	1	0	1	1	1	1	0	0	0	1	1	1	1	1	1	4	4	4	5	4	3	4	5	5	3	3	4	5	3	5	4	1	4	4	5
32099	3	2	26	1	5	1	1	1	0	1	0	1	0	1	1	1	1	0	0	1	0	1	1	0	1	1	0	0	0	5	5	5	3	4	3	2	3	3	3	2	4	4	5	4	5	4	3	4	4
32100	3	2	38	2	5	0	0	1	0	1	0	1	0	1	0	1	0	1	0	1	0	1	1	0	0	1	1	0	0	4	4	5	5	3	4	4	4	4	4	4	4	4	3	3	3	3	3	4	3
32101	3	1	18	1	4	0	1	0	1	1	0	1	0	0	1	0	1	1	0	1	0	0	0	1	1	1	1	0	0	5	5	5	5	4	4	5	5	5	3	4	5	5	4	5	4	5	3	5	5
32102	3	1	29	1	6	0	0	1	1	0	0	0	0	0	0	1	1	0	0	0	0	1	1	1	1	0	0	0	0	4	4	4	4	4	3	5	4	4	3	3	4	4	3	5	4	3	1	4	3
32103	3	2	32	1	7	1	1	1	1	0	0	0	0	1	1	1	1	0	0	0	0	1	1	1	1	0	0	0	0	5	4	5	5	3	4	5	5	5	4	5	3	5	4	3	4	3	3	3	5
32105	3	2	44	2	5	1	1	1	1	1	1	1	0	0	0	1	1	1	0	0	0	1	1	1	1	1	1	1	0	5	4	4	4	3	4	5	3	5	2	2	3	4	3	5	1	1	3	3	4
32106	3	2	52	2	5	0	0	1	1	1	0	0	0	0	0	1	1	1	0	0	0	1	1	1	1	1	1	0	0	4	5	5	4	4	5	4	4	5	5	4	4	4	4	4	4	3	1	3	1
32107	3	1	26	1	5	1	1	0	0	1	0	1	0	0	0	0	0	1	0	0	0	0	0	0	0	1	1	0	0	5	5	5	5	4	4	3	5	5	1	1	1	1	1	4	1	1	1	1	1
32108	3	2	21	1	5	1	0	0	0	1	0	1	0	1	0	0	0	1	0	0	0	0	0	0	0	1	1	0	0	4	5	5	4	4	5	5	4	5	5	4	4	3	3	3	3	4	4	3	3
32109	3	1	19	1	5	1	0	0	0	1	0	1	0	1	1	0	0	1	1	0	0	0	0	0	0	1	1	0	1	4	4	5	5	4	5	4	4	5	4	4	5	5	5	5	4	4	4	5	5
32110	3	1	38	2	5	1	0	0	0	1	0	0	0	1	0	0	0	1	0	0	0	0	0	0	0	1	1	0	0	5	5	5	5	4	4	4	5	5	4	4	5	4	4	5	4	4	4	5	4
32111	3	1	19	1	4	1	0	0	0	1	0	1	0	1	0	0	0	1	0	0	0	0	0	0	0	1	1	0	0	5	5	5	5	5	5	4	4	5	5	4	5	5	5	5	4	5	4	5	5
32112	3	1	18	1	4	1	0	0	0	1	0	1	0	1	1	0	0	1	0	0	0	0	0	0	0	1	1	0	0	5	4	5	5	3	5	4	4	5	4	4	5	4	5	5	4	4	4	5	5
32113	3	1	45	2	4	1	0	0	0	1	1	1	0	1	1	0	0	1	0	1	0	0	0	0	0	1	1	1	0	5	5	5	5	5	5	5	5	5	4	4	3	3	3	4	5	4	4	3	3
32114	3	1	50	2	5	0	1	0	0	1	1	0	0	1	0	0	0	1	0	0	0	0	0	0	0	1	1	1	0	5	4	5	4	5	5	4	4	5	4	4	5	5	5	5	4	5	4	4	5
32116	3	1	54	2	5	1	1	1	1	1	0	1	0	1	1	0	1	1	0	1	0	1	0	1	1	1	1	0	0	5	5	5	5	4	4	5	5	5	4	4	5	4	4	4	4	5	4	5	5
32117	3	2	55	2	5	1	1	1	0	1	0	0	0	0	0	1	0	1	0	0	0	1	1	0	0	1	1	0	0	4	4	5	4	5	4	4	4	5	3	4	4	4	5	4	4	5	4	4	4
32118	3	2	29	1	5	1	1	1	0	1	0	1	0	1	0	1	0	1	0	1	0	1	1	0	0	1	1	0	0	5	5	5	5	5	5	5	5	4	5	4	4	4	5	4	4	5	4	4	5
32119	3	2	38	2	5	1	1	1	0	1	1	1	0	1	1	1	0	1	0	0	0	1	1	0	0	1	1	1	0	5	5	4	5	4	4	5	5	5	4	5	3	4	5	3	2	5	5	4	4
32120	3	2	18	1	4	1	1	0	1	1	1	1	0	0	0	0	0	0	0	0	1	0	0	1	0	1	0	1	0	1	1	1	1	2	2	1	1	1	4	4	4	4	4	4	4	4	1	2	1
32121	3	1	27	1	7	1	1	0	1	1	1	1	0	1	1	0	1	1	1	1	0	0	0	1	1	1	1	1	1	5	5	5	5	5	5	4	5	5	2	2	2	2	2	4	3	2	2	2	2
32122	3	2	29	1	7	1	1	0	0	1	0	1	0	1	1	0	0	1	1	0	0	0	0	0	0	1	1	0	1	5	5	5	5	5	5	5	5	5	3	3	5	4	5	5	4	4	4	5	4
32123	3	2	51	2	5	1	0	1	0	1	1	0	0	1	0	1	0	1	1	0	0	1	1	0	0	1	1	1	1	5	5	5	5	4	4	5	5	5	4	3	4	5	5	4	4	5	5	3	4
32124	3	2	23	1	5	1	1	0	0	1	0	1	0	1	1	0	0	1	1	0	0	0	0	0	0	1	1	0	1	5	5	4	5	5	5	3	5	5	1	1	4	3	3	2	3	4	2	4	4
32125	3	1	40	2	4	1	0	0	0	1	0	0	0	1	0	0	0	1	0	0	0	0	0	0	0	1	1	0	0	5	5	5	5	5	5	5	5	5	4	4	4	3	3	4	3	3	3	3	3
32126	3	2	53	2	5	1	0	0	0	1	0	0	0	1	0	0	0	1	0	0	0	0	0	0	0	1	1	0	0	4	2	3	4	3	4	3	4	4	4	3	4	4	3	5	4	5	4	4	4
32127	3	2	20	1	5	1	1	0	0	1	0	1	0	1	1	0	1	1	0	1	0	0	0	0	1	1	1	0	0	5	5	5	5	4	4	4	4	5	3	3	4	4	4	4	3	3	2	4	4
32128	3	2	51	2	4	0	0	0	0	1	1	0	0	1	0	0	0	1	1	0	0	0	0	0	0	1	1	1	1	4	4	4	5	5	5	5	5	4	3	3	4	3	4	5	4	4	3	3	3
32129	3	2	51	2	5	1	1	0	0	1	0	0	0	1	1	0	0	1	1	0	0	0	0	0	0	1	1	0	1	5	5	5	5	5	5	5	5	5	4	4	4	4	5	4	4	4	4	4	4
32130	3	1	23	1	6	1	0	0	0	1	0	0	0	1	1	0	0	1	0	1	0	0	0	0	0	1	1	0	0	5	5	4	5	4	4	4	5	4	5	5	5	4	4	5	5	5	5	5	4
32131	3	2	18	1	4	1	0	0	0	1	0	1	0	1	0	0	0	1	0	0	0	0	0	0	0	1	1	0	0	5	5	5	5	3	5	5	5	5	2	3	5	2	3	5	4	2	1	4	1
32132	3	2	20	1	4	1	0	1	0	1	0	0	0	1	0	0	1	0	0	0	0	1	0	0	1	1	0	0	0	5	4	3	5	4	3	3	4	5	5	3	4	3	5	4	3	3	3	4	5
32133	3	2	53	2	4	1	0	1	0	0	1	0	0	1	0	1	0	0	1	0	0	1	1	0	0	0	0	1	1	5	5	5	5	5	5	5	5	5	4	3	3	3	3	4	3	4	3	4	3
32134	3	2	52	2	5	1	1	1	0	1	1	0	0	1	1	1	0	1	1	0	0	1	1	0	0	1	1	1	1	5	5	5	5	4	5	5	4	5	4	5	4	5	5	4	4	4	5	4	5
32135	3	2	55	2	6	1	1	1	0	1	1	1	0	0	0	1	0	1	0	1	0	1	1	0	0	1	1	1	0	5	5	5	5	4	4	5	5	5	3	5	4	5	5	4	4	4	4	4	5
32136	3	1	45	2	5	1	0	0	1	1	0	1	0	1	0	0	1	1	0	0	0	0	0	1	1	1	1	0	0	4	5	5	4	4	5	5	5	4	5	5	4	4	5	5	4	5	4	4	4
32137	3	2	36	2	4	1	1	0	0	1	0	0	0	1	1	0	0	1	0	0	0	0	0	0	0	1	1	0	0	4	5	5	5	4	5	5	5	4	4	5	4	5	5	4	4	5	4	4	5
32138	3	2	39	2	5	1	1	0	1	1	0	1	0	1	0	0	1	1	0	0	0	0	0	1	1	1	1	0	0	5	5	5	5	5	5	5	4	5	5	5	4	5	5	4	4	5	5	4	5
32139	3	2	45	2	5	1	0	1	0	1	0	0	0	1	1	0	0	1	1	0	0	1	0	0	0	1	1	0	1	5	4	5	5	5	5	5	5	5	4	5	5	5	4	4	3	5	5	5	5
32140	3	1	24	1	5	1	0	0	1	1	0	1	0	1	1	0	1	1	0	0	0	0	0	1	1	1	1	0	0	5	5	5	5	5	4	5	4	5	3	4	4	5	4	4	3	5	5	4	5
32141	3	2	40	2	4	1	0	1	0	1	0	1	0	1	0	1	0	1	0	1	0	1	1	0	0	1	1	0	0	4	5	5	5	5	5	5	5	5	3	4	4	5	4	5	4	5	5	4	5
32142	3	1	21	1	5	1	0	0	1	1	0	1	0	1	0	0	1	1	0	1	0	0	0	1	1	1	1	0	0	4	5	5	5	5	5	4	4	5	3	3	4	4	3	4	3	4	3	4	4
32143	3	1	52	2	5	1	1	0	1	1	0	1	0	1	1	0	1	1	0	1	0	0	0	1	1	1	1	0	0	4	5	5	5	5	5	5	4	5	4	5	5	5	5	4	5	5	5	5	4
32144	3	2	32	1	4	1	0	1	0	1	0	1	0	1	1	1	0	1	0	0	0	1	1	0	0	1	1	0	0	5	5	5	5	5	4	5	4	5	5	5	4	4	4	4	4	4	5	4	5
32145	3	1	45	2	5	1	1	0	1	1	0	1	0	1	1	0	1	1	0	1	0	0	0	1	1	1	1	0	0	4	4	5	5	5	5	5	5	5	4	5	4	5	5	5	4	5	4	4	5
32146	3	2	29	1	5	1	0	1	0	1	0	1	0	0	0	1	0	1	0	0	0	1	1	0	0	1	1	0	0	5	5	5	5	4	4	4	4	5	4	3	3	5	5	4	4	5	4	4	5
32147	3	2	45	2	4	1	0	1	0	1	1	1	0	1	0	0	0	1	0	0	0	1	0	0	0	1	1	1	0	5	5	5	5	5	5	5	5	5	4	5	4	5	4	5	5	5	5	4	4
32148	3	2	21	1	4	1	1	0	0	1	0	1	0	1	0	0	1	1	0	1	0	0	0	0	1	1	1	0	0	5	4	5	5	5	5	5	4	5	4	4	5	5	5	4	3	5	4	5	5
32149	3	1	41	2	5	1	0	0	0	1	1	1	0	0	0	0	0	1	0	1	0	0	0	0	0	1	1	1	0	5	5	4	5	4	5	4	4	5	4	4	5	5	5	5	4	5	5	4	5
32150	3	2	18	1	4	1	1	0	0	1	0	1	0	1	1	0	0	1	0	1	0	0	0	0	0	1	1	0	0	4	4	5	5	3	3	3	3	5	4	4	4	3	4	5	3	4	3	4	3
32151	3	2	36	2	5	1	0	1	0	1	0	1	0	1	0	1	0	1	1	0	0	1	1	0	0	1	1	0	1	4	4	4	4	4	4	5	3	4	3	4	4	4	3	4	3	4	3	4	4
32152	3	2	34	1	5	1	1	1	0	1	0	1	0	1	1	1	0	1	0	1	0	1	1	0	0	1	1	0	0	4	4	4	5	5	4	4	4	4	5	4	4	5	4	4	3	5	4	4	5
32154	3	2	30	1	4	1	1	1	1	1	1	1	0	1	0	0	0	0	0	0	0	1	0	1	0	1	0	1	0	5	5	5	5	5	5	5	5	5	1	1	2	5	2	5	3	3	5	5	5
32155	3	1	54	2	4	1	0	0	0	1	1	1	0	1	0	0	0	1	1	0	0	0	0	0	0	1	1	1	1	5	5	5	5	5	4	4	4	5	5	5	4	5	4	4	5	5	3	4	4
32157	3	1	27	1	4	1	1	0	0	1	0	1	0	1	1	0	0	1	0	1	0	0	0	0	0	1	1	0	0	4	5	5	5	4	4	4	4	5	3	3	3	3	2	4	3	2	3	3	4
32158	3	1	18	1	5	1	1	0	0	1	0	1	0	1	1	0	0	1	0	1	0	0	0	0	0	1	1	0	0	4	5	5	4	3	4	4	3	5	3	3	3	5	5	4	4	5	3	3	5
32160	3	1	37	2	5	1	1	0	1	1	0	1	0	1	1	0	1	1	0	1	0	0	0	1	1	1	1	0	0	4	4	5	4	3	5	4	3	5	3	3	4	5	5	5	3	3	3	3	4
32161	3	2	55	2	5	1	0	0	0	1	0	0	0	1	0	0	0	1	0	0	0	0	0	0	0	1	1	0	0	1	3	3	1	3	3	3	4	3	4	4	4	4	4	4	4	5	4	4	4
32162	3	2	19	1	4	1	1	0	0	1	1	1	0	1	0	0	0	1	1	0	0	0	0	0	0	1	1	1	1	4	5	5	5	4	4	5	5	5	2	2	5	5	2	5	4	4	1	5	5
32163	3	1	19	1	5	0	0	0	0	1	0	0	0	0	0	0	1	0	0	0	0	0	0	0	1	1	0	0	0	1	1	5	1	3	1	5	1	4	5	2	5	2	1	1	1	4	2	4	5
32164	3	2	21	1	5	1	0	0	0	1	0	0	0	1	0	0	1	0	0	0	0	0	0	0	1	1	0	0	0	3	4	5	3	4	4	4	4	4	4	3	4	3	2	5	5	3	4	5	3
32165	3	2	53	2	4	1	0	0	0	1	1	0	0	1	0	0	0	1	1	0	0	0	0	0	0	1	1	1	1	5	4	4	4	3	4	4	4	5	3	4	5	3	3	4	5	3	4	3	3
32166	3	2	51	2	5	1	0	0	0	1	0	0	0	1	0	0	0	1	0	0	0	0	0	0	0	1	1	0	0	4	5	5	4	3	4	5	4	4	3	3	4	3	3	5	5	4	3	4	4
32167	3	2	32	1	6	1	1	0	0	1	0	0	0	1	0	0	1	1	0	0	0	0	0	0	1	1	1	0	0	4	4	5	3	3	5	3	3	4	4	4	5	3	3	4	4	4	3	5	4
32168	3	1	50	2	4	1	0	0	1	1	0	0	0	1	0	0	1	1	0	0	0	0	0	1	1	1	1	0	0	4	5	5	4	4	4	5	4	5	2	2	2	2	3	5	4	4	2	4	3
32169	3	2	38	2	6	1	0	0	0	1	0	0	0	0	0	0	0	1	0	0	0	0	0	0	0	1	1	0	0	4	5	4	4	4	5	5	5	5	2	3	3	3	2	3	3	4	2	3	3
32170	3	1	22	1	5	1	0	0	0	1	0	1	0	1	1	0	0	1	0	1	0	0	0	0	0	1	1	0	0	5	4	5	5	5	4	5	4	5	1	3	3	4	4	4	4	5	1	4	4
32171	3	1	28	1	5	1	0	0	0	0	0	1	0	1	0	1	0	1	0	0	0	0	1	0	0	0	1	0	0	5	5	5	5	4	4	2	5	5	4	4	4	4	4	4	4	3	3	4	4
32172	3	2	35	1	5	1	0	0	0	1	0	0	0	1	0	0	0	1	0	0	0	0	0	0	0	1	1	0	0	4	4	5	4	5	4	4	4	5	4	4	3	4	3	4	4	4	4	4	3
32173	3	1	42	2	5	0	0	0	1	1	0	0	0	0	0	0	1	1	0	0	0	0	0	1	1	1	1	0	0	4	5	5	4	3	4	4	4	4	4	4	5	4	4	4	4	4	4	5	4
32174	3	2	37	2	5	1	1	1	0	1	1	1	0	1	1	1	0	1	1	1	0	1	1	0	0	1	1	1	1	4	4	5	4	3	3	4	4	4	3	2	5	5	5	5	2	3	3	3	5
32175	3	1	55	2	7	1	1	0	1	1	1	0	0	1	0	0	1	1	1	0	0	0	0	1	1	1	1	1	1	4	5	5	5	4	4	4	4	5	3	5	4	5	5	5	4	3	3	4	5
32176	3	2	53	2	5	1	1	1	1	1	1	1	0	1	1	1	0	1	1	0	0	1	1	1	0	1	1	1	1	4	5	5	4	3	5	4	4	4	3	3	4	4	5	4	3	4	3	4	5
32177	3	1	36	2	4	0	0	0	1	0	0	0	0	0	0	0	1	0	0	0	0	0	0	1	1	0	0	0	0	5	5	5	5	4	5	4	5	5	5	5	5	5	4	4	4	5	5	5	4
32178	3	1	35	1	6	1	1	1	0	1	0	1	0	1	1	1	0	1	0	1	0	1	1	0	0	1	1	0	0	5	5	5	5	3	3	3	5	5	3	4	3	4	3	2	1	4	3	3	4
32179	3	1	26	1	4	1	1	0	0	1	0	1	0	1	0	0	0	1	0	1	0	0	0	0	0	1	1	0	0	4	5	5	5	3	4	4	4	5	5	5	4	5	5	5	4	5	4	4	4
32180	3	1	54	2	6	1	0	0	0	1	0	0	0	1	0	0	0	1	0	0	0	0	0	0	0	1	1	0	0	5	5	5	5	3	5	5	5	5	5	5	5	3	5	5	3	5	5	5	5
32181	3	2	30	1	6	1	0	0	0	1	0	1	0	1	0	0	0	1	0	0	0	0	0	0	0	1	1	0	0	4	4	4	4	4	4	4	5	4	5	4	4	3	4	4	3	3	4	3	3
32182	3	1	50	2	5	1	0	0	0	1	0	1	0	1	0	0	0	1	0	1	0	0	0	0	0	1	1	0	0	4	4	5	5	4	5	4	5	5	4	5	4	5	4	4	5	5	5	4	5
32183	3	1	24	1	5	1	1	0	0	1	0	1	0	1	0	0	0	1	0	0	0	0	0	0	0	1	1	0	0	5	4	4	5	5	5	4	5	5	5	5	5	3	4	4	4	5	5	4	4
32185	3	1	52	2	5	1	0	0	0	1	1	0	0	1	0	0	0	1	0	0	0	0	0	0	0	1	1	1	0	5	5	4	5	3	5	2	5	5	2	3	4	2	4	5	5	2	2	4	3
32186	3	1	52	2	4	1	0	1	0	1	0	1	0	1	0	1	0	1	0	1	0	1	1	0	0	1	1	0	0	5	5	5	5	4	4	4	5	5	5	5	5	3	4	5	3	5	5	5	3
32187	3	1	37	2	5	1	0	0	0	1	0	1	0	1	0	0	0	1	0	1	0	0	0	0	0	1	1	0	0	5	5	5	5	5	5	5	5	5	2	2	4	4	2	4	4	4	4	4	4
32189	3	2	27	1	5	1	1	1	0	1	1	1	0	1	0	0	1	1	1	0	0	1	0	0	1	1	1	1	1	5	5	5	5	4	5	5	5	5	3	3	5	4	4	5	5	4	4	5	5
32190	3	1	32	1	4	1	0	1	0	1	0	0	0	0	0	0	0	1	1	0	0	1	0	0	0	1	1	0	1	5	5	5	5	5	5	4	5	5	3	3	5	4	4	5	4	5	3	4	4
32191	3	2	33	1	5	1	1	1	1	1	0	0	0	1	0	1	0	1	0	0	0	1	1	1	0	1	1	0	0	5	5	5	5	4	5	4	4	5	3	3	4	4	4	5	4	4	2	1	3
32192	3	2	28	1	4	0	0	1	0	0	0	0	0	1	0	1	0	0	0	0	0	1	1	0	0	0	0	0	0	5	3	3	3	4	4	4	4	4	3	4	4	4	5	4	5	4	4	4	4
32193	3	2	53	2	5	1	1	1	0	0	0	0	0	1	0	1	0	0	0	0	0	1	1	0	0	0	0	0	0	5	5	5	5	5	5	5	5	5	4	4	4	4	4	4	4	5	3	4	4
32194	3	2	30	1	5	1	0	1	0	1	0	1	0	1	0	1	0	1	0	0	0	1	1	0	0	1	1	0	0	5	5	4	5	3	3	5	4	5	2	4	5	5	5	5	5	5	5	5	5
32195	3	1	38	2	5	1	1	0	1	0	0	1	0	1	1	0	1	0	0	1	0	0	0	1	1	0	0	0	0	5	5	5	5	5	5	5	5	5	4	5	5	5	5	5	4	5	5	5	5
32196	3	2	27	1	4	1	1	1	0	0	0	0	0	1	0	1	0	0	0	0	0	1	1	0	0	0	0	0	0	4	5	4	5	4	4	3	3	5	3	3	4	4	4	3	3	3	3	4	4
32197	3	2	54	2	5	1	1	1	0	1	1	1	0	1	1	1	0	1	1	1	0	1	1	0	0	1	1	1	1	5	5	5	5	5	4	5	5	5	5	5	5	4	4	4	4	4	5	4	5
32198	3	2	38	2	5	1	0	1	0	1	0	0	0	0	0	1	0	1	0	0	0	1	1	0	0	1	1	0	0	4	5	5	5	5	5	5	5	5	4	5	5	5	4	5	4	4	3	4	4
32199	3	1	22	1	4	0	0	0	1	0	0	1	0	1	0	0	1	0	0	0	0	0	0	1	1	0	0	0	0	4	5	4	5	2	3	4	3	4	3	3	4	5	4	4	3	4	3	4	4
32200	3	1	26	1	5	1	1	0	1	0	0	0	0	1	1	0	1	0	0	0	0	0	0	1	1	0	0	0	0	4	4	5	5	3	5	3	3	5	5	5	5	5	5	5	3	5	5	5	5
32201	3	2	33	1	5	1	0	1	0	1	0	1	0	1	0	1	0	1	0	0	0	1	1	0	0	1	1	0	0	5	5	5	5	5	5	4	5	5	2	4	5	4	5	4	4	4	2	5	3
32202	3	1	25	1	4	1	0	0	1	1	0	0	0	1	0	0	1	1	0	0	0	0	0	1	1	1	1	0	0	5	5	5	5	3	5	5	5	5	4	5	5	4	4	5	5	4	5	4	3
32203	3	2	23	1	4	1	1	0	0	1	0	1	0	1	0	0	0	1	0	1	0	0	0	0	0	1	1	0	0	5	5	5	5	4	5	4	4	5	4	4	4	4	5	5	5	5	5	5	4
32204	3	2	48	2	4	1	0	1	0	1	0	0	0	1	0	1	0	1	0	0	0	1	1	0	0	1	1	0	0	5	5	5	5	5	5	5	5	5	5	5	5	4	5	5	4	5	5	5	4
32205	3	1	45	2	5	1	0	0	0	1	0	1	0	1	0	0	0	1	0	1	0	0	0	0	0	1	1	0	0	3	4	4	4	4	3	4	4	4	4	4	3	4	3	4	3	4	4	4	4
32206	3	2	38	2	6	0	0	0	1	1	1	1	0	0	1	0	0	1	0	0	0	0	0	1	0	1	1	1	0	5	5	5	5	4	5	4	5	5	2	2	5	4	4	4	3	4	3	4	3
32207	3	2	50	2	5	1	0	0	0	1	1	0	0	1	0	0	0	1	1	0	0	0	0	0	0	1	1	1	1	5	4	5	5	4	4	2	4	4	2	2	4	3	3	4	3	4	2	4	4
32208	3	2	53	2	4	1	0	0	0	1	0	0	0	1	0	0	0	1	0	0	0	0	0	0	0	1	1	0	0	5	4	5	4	4	4	4	5	4	3	2	4	4	3	4	3	4	2	4	3
32210	3	1	18	1	4	1	0	0	0	1	1	1	0	1	0	0	0	1	1	1	0	0	0	0	0	1	1	1	1	5	5	5	5	5	5	5	5	5	2	3	4	4	5	4	4	4	4	4	5
32211	3	1	18	1	5	1	1	0	0	1	0	1	0	1	1	0	0	1	0	1	0	0	0	0	0	1	1	0	0	4	5	5	5	4	4	5	5	5	3	3	5	5	5	5	4	4	3	4	5
32212	3	2	33	1	4	1	0	1	0	0	1	0	0	1	0	1	0	0	1	0	0	1	1	0	0	0	0	1	1	4	4	4	5	4	4	4	4	4	5	4	4	4	4	4	4	4	4	4	4
32213	3	1	54	2	5	1	0	0	1	1	0	0	0	1	0	0	1	0	0	0	0	0	0	1	1	1	0	0	0	4	4	5	4	5	4	4	4	5	4	5	4	4	4	4	4	4	4	4	5
32214	3	2	54	2	5	1	0	1	0	1	0	1	0	1	0	1	0	1	0	0	0	1	1	0	0	1	1	0	0	5	5	5	5	4	5	5	4	5	3	4	5	5	5	5	5	5	5	5	5
32215	3	1	49	2	4	1	1	0	0	1	0	0	0	1	0	0	0	1	0	0	0	0	0	0	0	1	1	0	0	4	5	5	5	4	5	4	5	5	4	4	4	5	4	4	5	5	4	5	5
32216	3	1	50	2	5	1	0	0	1	1	0	1	0	1	0	0	1	1	0	1	0	0	0	1	1	1	1	0	0	5	5	5	5	5	5	4	5	5	2	2	4	3	4	4	4	4	2	4	4
32217	3	2	20	1	5	1	0	0	0	1	0	1	0	1	0	0	0	1	0	1	0	0	0	0	0	1	1	0	0	5	5	5	5	5	5	5	5	5	3	4	4	3	3	4	4	4	2	4	4
32218	3	2	36	2	4	1	0	0	0	1	0	1	0	1	0	0	0	1	0	1	0	0	0	0	0	1	1	0	0	5	5	5	5	4	5	5	4	5	5	5	5	5	4	4	5	5	2	5	5
32219	3	1	36	2	6	1	0	0	0	1	0	1	0	1	0	0	0	1	0	1	0	0	0	0	0	1	1	0	0	5	5	5	5	5	5	5	5	5	3	3	3	3	2	4	3	4	3	4	3
32220	3	1	39	2	4	1	0	0	0	1	0	1	0	1	1	0	0	1	0	1	0	0	0	0	0	1	1	0	0	5	5	5	5	5	5	5	5	5	2	2	5	3	2	4	4	4	2	4	3
32221	3	1	54	2	4	1	1	0	0	1	0	1	0	1	1	0	0	1	0	1	0	0	0	0	0	1	1	0	0	5	5	5	5	5	5	4	5	5	5	5	5	4	4	4	4	5	4	5	4
32222	3	1	52	2	5	1	1	0	1	1	0	0	0	1	1	0	1	1	0	0	0	0	0	1	1	1	1	0	0	4	4	5	5	4	4	4	4	5	5	4	5	5	4	5	4	4	5	4	5
32223	3	1	54	2	4	1	1	1	0	1	0	1	0	0	1	0	1	1	0	0	0	1	0	0	1	1	1	0	0	5	5	5	5	4	5	5	5	5	4	5	5	5	4	5	5	4	4	5	5
32224	3	1	36	2	5	0	0	0	1	0	1	0	0	1	0	0	1	0	0	0	0	0	0	1	1	0	0	1	0	5	4	5	4	5	5	4	4	4	5	4	4	4	4	5	4	5	4	5	5
32225	3	2	32	1	6	1	0	1	0	1	0	0	0	1	0	1	0	1	0	0	0	1	1	0	0	1	1	0	0	5	4	5	4	4	5	4	4	5	4	5	4	5	5	5	4	4	4	4	4
32226	3	1	27	1	7	1	1	1	0	1	1	1	0	1	1	0	0	1	0	1	0	1	0	0	0	1	1	1	0	5	4	5	5	4	4	5	4	5	4	5	4	5	5	4	4	5	4	4	5
32227	3	1	36	2	5	1	1	0	0	1	0	1	0	1	1	0	0	1	0	1	0	0	0	0	0	1	1	0	0	4	5	4	5	5	5	4	4	4	5	5	5	3	4	5	3	5	5	5	3
32228	3	2	35	1	4	0	0	0	0	1	0	0	0	0	0	0	0	1	0	0	0	0	0	0	0	1	1	0	0	4	4	4	4	4	4	4	4	4	5	5	5	4	5	4	4	4	5	5	3
32229	3	1	38	2	5	0	0	0	0	1	0	0	0	0	0	0	0	1	0	0	0	0	0	0	0	1	1	0	0	5	5	5	5	5	5	5	5	5	5	4	5	2	5	5	3	5	5	5	2
32230	3	1	55	2	6	1	0	0	1	1	0	0	0	1	0	0	1	1	0	0	0	0	0	1	1	1	1	0	0	4	5	5	5	5	5	5	5	5	4	4	5	4	4	5	4	5	4	4	4
32231	3	1	37	2	4	0	0	1	0	1	0	0	0	0	0	1	0	1	0	0	0	1	1	0	0	1	1	0	0	5	5	5	5	4	5	5	5	5	2	2	4	4	3	4	4	4	2	4	3
32232	3	1	48	2	5	1	0	0	0	1	0	0	0	0	0	0	0	1	0	0	0	0	0	0	0	1	1	0	0	5	5	5	5	4	5	5	5	5	2	2	5	4	2	5	4	4	4	2	4
32233	3	1	55	2	4	1	0	0	0	1	1	0	0	1	0	0	0	1	1	0	0	0	0	0	0	1	1	1	1	5	5	5	5	5	5	4	4	5	2	2	4	4	4	5	4	4	2	4	4
32234	3	1	37	2	5	1	0	0	0	1	0	0	0	1	0	0	0	1	0	0	0	0	0	0	0	1	1	0	0	5	5	5	5	5	4	5	5	5	2	2	4	4	4	4	4	4	2	4	4
32235	3	1	48	2	4	1	1	0	1	1	1	1	0	1	0	0	1	1	1	1	0	0	0	1	1	1	1	1	1	5	5	5	5	5	5	4	5	5	4	5	5	5	5	5	4	5	5	5	5
32236	3	2	53	2	4	1	0	1	0	0	1	0	0	1	0	1	0	1	0	0	0	1	1	0	0	0	1	1	0	5	5	5	5	5	4	4	5	5	3	5	5	5	5	5	5	5	4	5	4
32238	3	2	32	1	6	0	0	1	0	1	0	1	0	1	1	1	0	0	0	0	0	1	1	0	0	1	0	0	0	5	4	5	5	4	5	4	4	4	4	4	4	4	4	5	4	5	5	4	5
32239	3	1	51	2	5	1	1	0	1	0	0	1	0	1	1	0	1	0	0	1	0	0	0	1	1	0	0	0	0	5	5	5	5	4	4	4	4	5	3	5	4	4	4	4	4	5	5	5	4
32240	3	1	32	1	5	0	1	1	1	1	1	1	0	0	0	1	1	1	1	1	0	1	1	1	1	1	1	1	1	5	5	5	5	5	4	5	4	5	3	4	5	3	3	4	4	5	5	5	5
32241	3	2	52	2	5	1	0	1	0	1	1	1	0	1	1	1	0	1	1	1	0	1	1	0	0	1	1	1	1	5	5	5	4	5	5	5	4	5	3	3	4	4	4	4	4	5	4	4	4
32242	3	2	31	1	6	1	0	1	0	1	0	0	0	1	0	1	0	1	0	0	0	1	1	0	0	1	1	0	0	5	5	5	5	5	4	4	4	5	5	5	3	5	5	5	4	5	4	5	5
32243	3	2	37	2	5	0	0	1	0	0	0	0	0	0	0	1	0	0	0	0	0	1	1	0	0	0	0	0	0	5	5	5	5	4	5	5	4	5	5	5	5	5	5	5	5	5	4	5	4
32244	3	2	41	2	4	1	0	1	1	1	1	0	0	1	0	1	1	1	1	0	0	1	1	1	1	1	1	1	1	5	4	5	5	4	5	4	4	5	4	4	4	4	4	4	4	4	4	4	4
32246	3	2	37	2	4	1	0	1	0	0	0	0	0	1	0	1	0	0	0	0	0	1	1	0	0	0	0	0	0	5	5	5	5	5	5	5	5	5	4	4	5	4	4	4	5	5	5	4	4
32247	3	2	36	2	5	1	0	1	0	1	0	0	0	1	0	1	0	1	0	0	0	1	1	0	0	1	1	0	0	5	5	5	5	5	5	5	5	5	4	4	5	5	5	5	5	5	4	4	4
32248	3	1	26	1	5	1	1	0	1	0	0	1	0	1	1	0	1	0	0	1	0	0	0	1	1	0	0	0	0	5	5	5	5	5	5	4	5	5	5	5	5	4	5	4	5	5	5	5	4
32249	3	1	23	1	5	0	1	0	1	1	0	0	0	0	1	0	1	1	0	0	0	0	0	1	1	1	1	0	0	5	5	5	5	5	5	5	5	5	3	3	4	4	4	4	4	5	5	4	4
32250	3	2	32	1	5	1	1	1	0	1	1	1	0	1	1	1	0	1	1	1	0	1	1	0	0	1	1	1	1	5	5	4	5	4	5	5	5	5	4	4	4	3	3	3	4	5	3	3	3
32251	3	2	37	2	4	0	1	1	0	0	0	1	0	1	0	1	0	1	0	0	0	1	1	0	0	0	1	0	0	5	5	5	5	5	5	5	5	5	5	4	4	4	4	5	4	4	5	4	5
32252	3	2	18	1	6	1	1	0	0	1	1	1	0	1	1	0	0	1	1	1	0	0	0	0	0	1	1	1	1	4	4	5	5	3	3	3	4	5	2	1	4	3	3	4	3	4	1	4	3
32253	3	1	50	2	4	1	0	0	1	1	0	0	0	1	0	0	0	1	1	0	0	0	0	1	0	1	1	0	1	4	5	5	5	4	5	4	4	5	3	4	3	4	5	4	5	5	3	4	4
32254	3	2	52	2	5	1	0	1	1	1	0	1	0	1	0	1	0	0	0	1	0	1	1	1	0	1	0	0	0	4	5	5	5	4	5	5	4	5	3	3	4	4	4	3	4	5	4	4	4
32255	3	1	26	1	5	0	0	0	1	1	0	0	0	0	0	0	1	1	0	0	0	0	0	1	1	1	1	0	0	5	4	5	5	4	4	4	4	5	3	4	3	4	4	3	4	5	3	4	4
32256	3	2	34	1	5	1	1	1	0	1	0	1	0	1	0	1	0	1	0	1	0	1	1	0	0	1	1	0	0	4	4	5	5	3	3	4	4	4	3	2	3	3	4	5	3	3	3	4	4
32257	3	1	25	1	4	1	1	0	0	1	0	0	0	1	1	0	1	1	0	0	0	0	0	0	1	1	1	0	0	4	4	5	5	4	5	4	4	5	3	4	3	4	4	3	4	5	4	5	4
32258	3	1	23	1	4	1	0	0	1	1	0	1	0	0	1	0	1	1	0	0	0	0	0	1	1	1	1	0	0	4	5	5	4	5	5	4	3	5	3	3	4	4	4	4	4	5	3	4	4
32259	3	1	26	1	4	1	1	0	1	0	0	1	0	1	1	0	1	0	0	1	0	0	0	1	1	0	0	0	0	4	5	4	4	4	4	5	4	5	4	4	4	4	4	4	4	5	3	4	4
32260	3	1	53	2	4	1	1	0	0	1	0	0	0	1	0	0	0	1	0	0	0	0	0	0	0	1	1	0	0	4	5	4	5	5	4	5	5	5	5	5	5	5	5	5	5	5	5	5	5
32261	3	2	34	1	5	1	0	0	0	1	1	0	0	1	0	0	0	1	1	0	0	0	0	0	0	1	1	1	1	5	5	4	5	4	5	5	4	5	3	5	4	4	4	4	4	5	4	4	5
32262	3	1	22	1	4	1	1	0	0	1	0	0	0	1	0	0	0	1	0	0	0	0	0	0	0	1	1	0	0	5	5	5	5	4	4	3	5	5	5	5	5	5	4	5	5	5	5	5	5
32263	3	2	19	1	4	1	0	0	0	1	0	1	0	1	1	0	0	1	0	1	0	0	0	0	0	1	1	0	0	5	5	5	5	5	4	4	5	5	3	4	4	4	4	4	4	5	3	4	3
32264	3	1	19	1	4	1	0	1	0	1	0	0	0	1	0	1	0	1	0	0	0	1	1	0	0	1	1	0	0	5	5	5	5	4	5	4	5	5	4	3	4	4	4	5	4	5	4	4	5
32265	3	2	20	1	4	1	1	0	0	1	0	1	0	1	0	0	0	1	0	1	0	0	0	0	0	1	1	0	0	5	5	5	5	4	5	4	4	5	4	2	4	4	4	4	4	5	3	4	4
32266	3	1	37	2	4	0	0	0	1	0	0	0	0	0	0	0	1	0	0	1	0	0	0	1	1	0	0	0	0	4	4	5	5	3	3	5	3	5	4	4	4	5	4	5	4	5	4	4	5
32267	3	1	39	2	4	1	0	0	0	1	0	0	0	1	0	0	0	1	0	0	0	0	0	0	0	1	1	0	0	5	5	5	4	5	5	5	5	5	4	4	5	4	4	4	4	5	5	5	4
32268	3	1	51	2	4	1	0	0	0	1	0	0	0	1	0	0	0	1	0	0	0	0	0	0	0	1	1	0	0	5	4	5	5	4	5	4	4	5	3	3	3	3	4	4	4	5	5	4	4
32269	3	2	53	2	4	1	0	0	0	1	0	0	0	1	0	1	0	1	1	0	0	0	1	0	0	1	1	0	1	4	5	5	5	4	4	5	4	5	3	4	4	3	4	4	5	5	4	5	5
32270	3	1	38	2	5	1	1	0	1	1	1	1	0	1	1	0	1	1	1	1	0	0	0	1	1	1	1	1	1	5	5	5	5	2	5	5	5	5	5	5	5	5	5	5	5	5	5	5	5
32271	3	1	53	2	4	1	0	0	0	1	0	0	0	1	0	0	0	1	0	0	0	0	0	0	0	1	1	0	0	5	5	5	5	5	5	4	4	5	3	3	5	5	4	5	4	4	4	4	4
32272	3	1	18	1	4	1	0	0	0	1	0	0	0	1	0	0	0	1	0	1	0	0	0	0	0	1	1	0	0	3	4	4	5	2	4	2	5	5	4	5	3	3	3	3	4	4	4	4	5
32273	3	1	29	1	4	1	1	0	0	1	1	0	0	1	0	0	0	1	0	1	0	0	0	0	0	1	1	1	0	5	5	4	5	4	4	4	4	5	2	2	3	4	3	5	3	3	3	4	4
32274	3	1	27	1	5	1	1	0	1	1	0	1	0	0	0	0	1	1	0	1	0	0	0	1	1	1	1	0	0	4	5	5	4	4	4	5	4	5	3	2	4	3	2	5	3	3	2	3	3
32275	3	1	54	2	5	1	0	0	0	1	0	0	0	1	0	0	1	1	0	0	0	0	0	0	1	1	1	0	0	4	4	5	5	3	4	5	4	4	4	4	4	5	5	5	4	4	4	4	4
32276	3	2	34	1	4	1	0	0	0	1	0	0	0	1	0	0	0	1	0	0	0	0	0	0	0	1	1	0	0	5	5	4	5	4	4	2	5	5	4	4	4	4	5	5	5	5	4	4	4
32277	3	1	28	1	4	1	0	0	0	1	0	0	0	1	0	1	0	0	0	0	0	0	1	0	0	1	0	0	0	5	4	5	5	5	5	4	4	5	1	5	5	4	4	5	1	4	3	4	4
32278	3	1	36	2	5	1	0	1	0	1	0	0	0	1	0	1	0	1	0	0	0	1	1	0	0	1	1	0	0	5	5	5	5	4	5	4	5	5	2	3	5	3	4	5	3	2	3	5	5
32279	3	1	48	2	5	0	1	0	0	1	0	0	0	0	0	0	0	1	0	0	0	0	0	0	0	1	1	0	0	5	5	5	5	5	5	5	5	5	4	5	5	5	3	5	5	4	4	4	4
32280	3	1	40	2	4	0	0	0	0	1	1	0	0	1	0	0	0	1	1	0	0	0	0	0	0	1	1	1	1	5	5	5	5	5	5	5	5	5	1	1	3	2	1	4	3	3	2	3	3
32281	3	1	36	2	4	1	0	0	1	1	1	0	0	0	0	0	0	1	0	0	0	0	0	1	0	1	1	1	0	5	5	5	5	5	5	5	5	5	4	5	5	5	5	5	4	5	5	5	5
32282	3	1	38	2	4	1	1	0	0	1	0	0	0	1	0	0	0	1	0	0	0	0	0	0	0	1	1	0	0	5	5	5	5	4	4	4	4	3	4	5	5	2	5	5	5	4	5	4	5
32283	3	2	52	2	4	1	0	0	0	1	0	0	0	1	0	0	0	1	0	0	0	0	0	0	0	1	1	0	0	5	5	5	4	4	5	5	4	5	4	4	5	5	5	5	4	4	4	4	5
32284	3	2	55	2	4	1	0	1	0	1	0	0	0	1	0	1	0	1	0	0	0	1	1	0	0	1	1	0	0	5	5	5	4	4	4	4	5	5	4	4	4	5	5	5	4	5	4	5	5
32285	3	2	27	1	7	1	1	0	1	1	0	0	0	1	1	1	1	1	0	0	0	0	1	1	1	1	1	0	0	5	5	5	5	4	5	4	5	5	3	4	4	4	5	5	3	4	4	4	4
32286	3	2	39	2	6	1	1	1	0	1	0	1	0	1	0	1	0	1	0	0	0	1	1	0	0	1	1	0	0	5	4	4	5	4	4	5	3	5	3	3	3	3	3	4	4	4	3	4	4
32287	3	2	36	2	7	1	0	1	1	0	1	0	0	1	0	1	1	0	1	0	0	1	1	1	1	0	0	1	1	4	3	3	4	3	4	5	3	4	3	4	4	3	3	4	4	4	5	4	4
32288	3	2	54	2	5	1	0	0	0	1	0	0	0	1	0	0	0	1	0	0	0	0	0	0	0	1	1	0	0	3	4	3	5	4	4	4	3	3	2	2	2	2	3	2	3	3	3	2	3
32289	3	2	55	2	5	1	0	0	1	1	0	0	0	1	0	0	1	1	0	0	0	0	0	1	1	1	1	0	0	4	4	4	3	3	3	4	4	4	3	3	3	4	3	3	5	4	3	3	3
32290	3	1	55	2	5	0	0	0	1	1	1	0	0	0	0	0	1	1	1	0	0	0	0	1	1	1	1	1	1	5	5	5	5	5	5	5	5	5	4	4	3	3	3	3	3	2	4	4	3
32291	3	1	25	1	4	1	1	0	1	0	0	1	0	1	1	0	1	0	0	0	0	0	0	1	1	0	0	0	0	4	4	3	3	4	3	3	3	4	3	2	3	3	3	3	4	3	4	3	3
32292	3	1	28	1	4	0	0	0	1	1	0	0	0	0	0	0	1	1	0	0	0	0	0	1	1	1	1	0	0	3	3	3	4	3	4	3	4	4	4	4	3	3	3	3	4	3	3	3	3
32293	3	1	32	1	5	0	1	1	1	0	0	0	0	0	0	1	1	0	0	0	0	1	1	1	1	0	0	0	0	3	4	4	4	3	3	4	4	4	4	4	4	3	4	3	3	4	4	4	4
32294	3	1	50	2	7	1	0	0	0	1	0	0	0	1	0	0	0	1	0	0	0	0	0	0	0	1	1	0	0	4	4	4	4	4	4	4	4	4	4	3	3	4	3	4	3	4	4	3	4
32295	3	1	35	1	5	1	1	0	1	0	0	0	0	1	0	0	1	0	0	0	0	0	0	1	1	0	0	0	0	4	5	5	5	3	5	5	4	4	4	4	5	4	4	5	4	4	4	4	4
32296	3	1	53	2	6	1	0	0	1	0	0	0	0	1	0	0	1	0	0	0	0	0	0	1	1	0	0	0	0	4	4	5	5	5	4	4	4	5	3	3	4	4	4	5	4	5	3	4	4
32297	3	1	40	2	4	1	0	0	1	1	0	0	0	1	0	0	1	1	0	1	0	0	0	1	1	1	1	0	0	4	5	5	5	5	5	4	3	5	3	3	5	4	4	5	4	5	3	5	4
32298	3	1	25	1	5	1	0	0	1	0	0	0	0	1	1	0	1	0	0	1	0	0	0	1	1	0	0	0	0	4	5	5	5	5	4	4	4	5	4	4	5	4	4	5	4	5	4	4	4
[truncated: 60 more columns]

## Sheet: Variable View
QrNo	Input QrNo (Five:One City Number+One Round Number+Three Swift Number)
S1	S1. Could you tell me which city you live in currently? [SA]
S4	S4. Record the gender
AGE	S5. How old are you?
S5	Agebands
S6	S6. What is your monthly household income?(SA)
S7_1_1	S7-1. What have you bought in the past 6 months?(random the options, MA) (Milk)
S7_1_2	S7-1. What have you bought in the past 6 months?(random the options, MA) (Coffee)
S7_1_3	S7-1. What have you bought in the past 6 months?(random the options, MA) (Infant milk formala)
S7_1_4	S7-1. What have you bought in the past 6 months?(random the options, MA) (Whiskey)
S7_1_5	S7-1. What have you bought in the past 6 months?(random the options, MA) (Cooking oil)
S7_1_6	S7-1. What have you bought in the past 6 months?(random the options, MA) (Olive oil)
S7_1_7	S7-1. What have you bought in the past 6 months?(random the options, MA) (Chocolate)
S7_1_9	S7-1. What have you bought in the past 6 months?(random the options, MA) (None of above)
S7_2_1	S7-2. What will you intend to buy in the next 3 months?(random the options, MA) (Milk)
S7_2_2	S7-2. What will you intend to buy in the next 3 months?(random the options, MA) (Coffee)
S7_2_3	S7-2. What will you intend to buy in the next 3 months?(random the options, MA) (Infant milk formala)
S7_2_4	S7-2. What will you intend to buy in the next 3 months?(random the options, MA) (Whiskey)
S7_2_5	S7-2. What will you intend to buy in the next 3 months?(random the options, MA) (Cooking oil)
S7_2_6	S7-2. What will you intend to buy in the next 3 months?(random the options, MA) (Olive oil)
S7_2_7	S7-2. What will you intend to buy in the next 3 months?(random the options, MA) (Chocolate)
S7_2_9	S7-2. What will you intend to buy in the next 3 months?(random the options, MA) (None of above)
S8_1	S8. Record the respondent type (Infant milk formala purchaser)
S8_2	S8. Record the respondent type (Infant milk formala indender)
S8_3	S8. Record the respondent type (Whiskey purchaser)
S8_4	S8. Record the respondent type (Whiskey intender)
S8_5	S8. Record the respondent type (Cooking oil purchaser)
S8_6	S8. Record the respondent type (Cooking oil intender)
S8_7	S8. Record the respondent type (Olive oil purchaser)
S8_8	S8. Record the respondent type (Olive oil intender)
Q1_1_T1	1.1 To what extent do you agree/disagree that you are worried about each of the following: (Counterfeit food & drink)
Q1_1_T2	1.1 To what extent do you agree/disagree that you are worried about each of the following: (Inferior quality food & drink)
Q1_1_T3	1.1 To what extent do you agree/disagree that you are worried about each of the following: (Food& drink containing residues of pesticides or veterinary drugs)
Q1_1_T4	1.1 To what extent do you agree/disagree that you are worried about each of the following: (Deteriorated food & drink (for example, mould and bacteria))
Q1_1_T5	1.1 To what extent do you agree/disagree that you are worried about each of the following: (Nutritionally imbalanced food & drink)
Q1_1_T6	1.1 To what extent do you agree/disagree that you are worried about each of the following: (Food & drink containing additives )
Q1_1_T7	1.1 To what extent do you agree/disagree that you are worried about each of the following: (Genetically Modified food & drink)
Q1_1_T8	1.1 To what extent do you agree/disagree that you are worried about each of the following: (Food & drink that has been miss-described )
Q1_1_T9	1.1 To what extent do you agree/disagree that you are worried about each of the following: (Adulterated food & drink (for example: tainted food & drink, food & drink that has been diluted or had chemicals added))
Q3_3_T1	3.3 I will read a list of organisations and individuals and I would like you to tell me the extent to which you agree/disagree that they can be trusted to protect the consumer from adulterated and unsafe food and drink? by ¡®adulterated food and drink¡¯
Q3_3_T2	3.3 I will read a list of organisations and individuals and I would like you to tell me the extent to which you agree/disagree that they can be trusted to protect the consumer from adulterated and unsafe food and drink? by ¡®adulterated food and drink¡¯
Q3_3_T3	3.3 I will read a list of organisations and individuals and I would like you to tell me the extent to which you agree/disagree that they can be trusted to protect the consumer from adulterated and unsafe food and drink? by ¡®adulterated food and drink¡¯
Q3_3_T4	3.3 I will read a list of organisations and individuals and I would like you to tell me the extent to which you agree/disagree that they can be trusted to protect the consumer from adulterated and unsafe food and drink? by ¡®adulterated food and drink¡¯
Q3_3_T5	3.3 I will read a list of organisations and individuals and I would like you to tell me the extent to which you agree/disagree that they can be trusted to protect the consumer from adulterated and unsafe food and drink? by ¡®adulterated food and drink¡¯
Q3_3_T6	3.3 I will read a list of organisations and individuals and I would like you to tell me the extent to which you agree/disagree that they can be trusted to protect the consumer from adulterated and unsafe food and drink? by ¡®adulterated food and drink¡¯
Q3_3_T7	3.3 I will read a list of organisations and individuals and I would like you to tell me the extent to which you agree/disagree that they can be trusted to protect the consumer from adulterated and unsafe food and drink? by ¡®adulterated food and drink¡¯
Q3_3_T8	3.3 I will read a list of organisations and individuals and I would like you to tell me the extent to which you agree/disagree that they can be trusted to protect the consumer from adulterated and unsafe food and drink? by ¡®adulterated food and drink¡¯
Q3_4_T1	3.4 I will read a list of organisations and individuals and I would like you to tell me the extent to which you agree/disagree that they can be trusted to provide consumers with accurate information about the authenticity of food and drink? (Food manufactu
Q3_4_T2	3.4 I will read a list of organisations and individuals and I would like you to tell me the extent to which you agree/disagree that they can be trusted to provide consumers with accurate information about the authenticity of food and drink? (Consumer organ
Q3_4_T3	3.4 I will read a list of organisations and individuals and I would like you to tell me the extent to which you agree/disagree that they can be trusted to provide consumers with accurate information about the authenticity of food and drink? (Medical doctor
Q3_4_T4	3.4 I will read a list of organisations and individuals and I would like you to tell me the extent to which you agree/disagree that they can be trusted to provide consumers with accurate information about the authenticity of food and drink? (Dieticians/nut
Q3_4_T5	3.4 I will read a list of organisations and individuals and I would like you to tell me the extent to which you agree/disagree that they can be trusted to provide consumers with accurate information about the authenticity of food and drink? (Friends and fa
Q3_4_T6	3.4 I will read a list of organisations and individuals and I would like you to tell me the extent to which you agree/disagree that they can be trusted to provide consumers with accurate information about the authenticity of food and drink? (The media)
Q3_4_T7	3.4 I will read a list of organisations and individuals and I would like you to tell me the extent to which you agree/disagree that they can be trusted to provide consumers with accurate information about the authenticity of food and drink? (Government)
Q3_4_T8	3.4 I will read a list of organisations and individuals and I would like you to tell me the extent to which you agree/disagree that they can be trusted to provide consumers with accurate information about the authenticity of food and drink? (Food retailers
Q4_1_T1	4.1. I will read out a list of potential risks posed by adulterated food and drink products. Please indicate the extent to which you agree/disagree that the adulterated food and drink poses a risk to: (Consumer health)
Q4_1_T2	4.1. I will read out a list of potential risks posed by adulterated food and drink products. Please indicate the extent to which you agree/disagree that the adulterated food and drink poses a risk to: (You personally)
Q4_1_T3	4.1. I will read out a list of potential risks posed by adulterated food and drink products. Please indicate the extent to which you agree/disagree that the adulterated food and drink poses a risk to: (Your family )
Q4_1_T4	4.1. I will read out a list of potential risks posed by adulterated food and drink products. Please indicate the extent to which you agree/disagree that the adulterated food and drink poses a risk to: (Food & drink quality)
Q4_1_T5	4.1. I will read out a list of potential risks posed by adulterated food and drink products. Please indicate the extent to which you agree/disagree that the adulterated food and drink poses a risk to: (The environment)
Q4_1_T6	4.1. I will read out a list of potential risks posed by adulterated food and drink products. Please indicate the extent to which you agree/disagree that the adulterated food and drink poses a risk to: (The economy)
Q4_1_T7	4.1. I will read out a list of potential risks posed by adulterated food and drink products. Please indicate the extent to which you agree/disagree that the adulterated food and drink poses a risk to: (The taste of food & drink)
Q4_1_T8	4.1. I will read out a list of potential risks posed by adulterated food and drink products. Please indicate the extent to which you agree/disagree that the adulterated food and drink poses a risk to: (Food & drink safety)
Q4_1_T9	4.1. I will read out a list of potential risks posed by adulterated food and drink products. Please indicate the extent to which you agree/disagree that the adulterated food and drink poses a risk to: (The nutritional quality of food & drink)
Q4_1_T10	4.1. I will read out a list of potential risks posed by adulterated food and drink products. Please indicate the extent to which you agree/disagree that the adulterated food and drink poses a risk to: (The reputation of China )
Q4_1_T11	4.1. I will read out a list of potential risks posed by adulterated food and drink products. Please indicate the extent to which you agree/disagree that the adulterated food and drink poses a risk to: (Your confidence in the food supply chain)
Q4_1_T12	4.1. I will read out a list of potential risks posed by adulterated food and drink products. Please indicate the extent to which you agree/disagree that the adulterated food and drink poses a risk to: (Your confidence in food regulators)
Q4_2_T1	4.2. I will read out a list of potential benefits demonstrating the authenticity of food and drink products. To what extent do you agree/ disagree that demonstrating the authenticity of food & drink will be of benefit to: (Improve consumer health)
Q4_2_T2	4.2. I will read out a list of potential benefits demonstrating the authenticity of food and drink products. To what extent do you agree/ disagree that demonstrating the authenticity of food & drink will be of benefit to: (Improve food & drink safety)
Q4_2_T3	4.2. I will read out a list of potential benefits demonstrating the authenticity of food and drink products. To what extent do you agree/ disagree that demonstrating the authenticity of food & drink will be of benefit to: (Improve food & drink quality)
Q4_2_T4	4.2. I will read out a list of potential benefits demonstrating the authenticity of food and drink products. To what extent do you agree/ disagree that demonstrating the authenticity of food & drink will be of benefit to: (Be beneficial to you )
Q4_2_T5	4.2. I will read out a list of potential benefits demonstrating the authenticity of food and drink products. To what extent do you agree/ disagree that demonstrating the authenticity of food & drink will be of benefit to: (Be beneficial to your family )
Q4_2_T6	4.2. I will read out a list of potential benefits demonstrating the authenticity of food and drink products. To what extent do you agree/ disagree that demonstrating the authenticity of food & drink will be of benefit to: (Improve consumer trust )
Q4_2_T7	4.2. I will read out a list of potential benefits demonstrating the authenticity of food and drink products. To what extent do you agree/ disagree that demonstrating the authenticity of food & drink will be of benefit to: (Be beneficial to the environment
Q4_2_T8	4.2. I will read out a list of potential benefits demonstrating the authenticity of food and drink products. To what extent do you agree/ disagree that demonstrating the authenticity of food & drink will be of benefit to: (Be beneficial to the Chinese eco
Q4_2_T9	4.2. I will read out a list of potential benefits demonstrating the authenticity of food and drink products. To what extent do you agree/ disagree that demonstrating the authenticity of food & drink will be of benefit to: (Increase the reliability of food
Q4_2_T10	4.2. I will read out a list of potential benefits demonstrating the authenticity of food and drink products. To what extent do you agree/ disagree that demonstrating the authenticity of food & drink will be of benefit to: (Improve the reputation of China)
Q4_2_T11	4.2. I will read out a list of potential benefits demonstrating the authenticity of food and drink products. To what extent do you agree/ disagree that demonstrating the authenticity of food & drink will be of benefit to: (Improve trust in the food chain)
Q4_2_T12	4.2. I will read out a list of potential benefits demonstrating the authenticity of food and drink products. To what extent do you agree/ disagree that demonstrating the authenticity of food & drink will be of benefit to: (Improve trust in food regulators
Q4_2_T13	4.2. I will read out a list of potential benefits demonstrating the authenticity of food and drink products. To what extent do you agree/ disagree that demonstrating the authenticity of food & drink will be of benefit to: (Improve trust in food & drink pr
Q4_2_T14	4.2. I will read out a list of potential benefits demonstrating the authenticity of food and drink products. To what extent do you agree/ disagree that demonstrating the authenticity of food & drink will be of benefit to: (Improve trust in Chinese food &
Q5_1_T1	5.1 Please tell me which of the following you would consider to be important when making judgements about the authenticity of a food and drink products? (Country of origin)
Q5_1_T2	5.1 Please tell me which of the following you would consider to be important when making judgements about the authenticity of a food and drink products? (A product that is produced and packaged in Europe)
Q5_1_T3	5.1 Please tell me which of the following you would consider to be important when making judgements about the authenticity of a food and drink products? (A product that is produced and packaged in China)
Q5_1_T4	5.1 Please tell me which of the following you would consider to be important when making judgements about the authenticity of a food and drink products? (The brand)
Q5_1_T5	5.1 Please tell me which of the following you would consider to be important when making judgements about the authenticity of a food and drink products? (The nutritional information)
Q5_1_T6	5.1 Please tell me which of the following you would consider to be important when making judgements about the authenticity of a food and drink products? (The price)
Q5_1_T7	5.1 Please tell me which of the following you would consider to be important when making judgements about the authenticity of a food and drink products? (The packaging )
Q5_1_T8	5.1 Please tell me which of the following you would consider to be important when making judgements about the authenticity of a food and drink products? (The retailer )
Q5_1_T9	5.1 Please tell me which of the following you would consider to be important when making judgements about the authenticity of a food and drink products? (The product has a tamper proof seal)
Q5_1_T10	5.1 Please tell me which of the following you would consider to be important when making judgements about the authenticity of a food and drink products? (The product has a certificate of authenticity)
Q5_1_T11	5.1 Please tell me which of the following you would consider to be important when making judgements about the authenticity of a food and drink products? (The barcode )
Q6_1_T1	6.1 To what extend do you agree /disagree that it is important to know the origin of the following food or drink products? (All food & drink products )
Q6_1_T2	6.1 To what extend do you agree /disagree that it is important to know the origin of the following food or drink products? (Food & drinks I buy in restaurants )
Q6_1_T3	6.1 To what extend do you agree /disagree that it is important to know the origin of the following food or drink products? (Food & drinks I consume at home )
Q6_1_T4	6.1 To what extend do you agree /disagree that it is important to know the origin of the following food or drink products? (Green food & drink products)
Q6_1_T5	6.1 To what extend do you agree /disagree that it is important to know the origin of the following food or drink products? (Luxury food & drink products)
Q6_1_T6	6.1 To what extend do you agree /disagree that it is important to know the origin of the following food or drink products? (Imported food & drink products )
Q6_1_T7	6.1 To what extend do you agree /disagree that it is important to know the origin of the following food or drink products? (Food & drinks I give as gifts )
Q6_1_T8	6.1 To what extend do you agree /disagree that it is important to know the origin of the following food or drink products? (Food & drink that I personally consume )
Q6_1_T9	6.1 To what extend do you agree /disagree that it is important to know the origin of the following food or drink products? (Food & drink that my family consume )
Q7_1_T1	7.1 I am going to ask you some questions about your purchasing attitudes and intentions. Please tell me the extent to which you agree/disagree with the following statements: (Beneficial)
Q7_1_T2	7.1 I am going to ask you some questions about your purchasing attitudes and intentions. Please tell me the extent to which you agree/disagree with the following statements: (Unimportant)
Q7_1_T3	7.1 I am going to ask you some questions about your purchasing attitudes and intentions. Please tell me the extent to which you agree/disagree with the following statements: (Essential)
Q7_2_T1	7.2 I am going to read three statements and I would like you to tell me on a 1-10 scale the extent to which you agree/disagree. (I intend to purchase food and drinks which have been traced for authenticity )
Q7_2_T2	7.2 I am going to read three statements and I would like you to tell me on a 1-10 scale the extent to which you agree/disagree. (I plan to purchase food and drinks which have been traced for authenticity)
Q7_2_T3	7.2 I am going to read three statements and I would like you to tell me on a 1-10 scale the extent to which you agree/disagree. (I will try to purchase authentic food and drinks which have been traced for authenticity)
Q9_3	9.3 Which of the following best describe your education level£¿
Q9_4	9.4 Which of the following best describes your parent¡¯s education level?
Q9_5	9.5 On average, what is your monthly spend on grocery shopping?
